# Supplementary material for: Combination of single-nucleus and bulk RNA-seq reveals the molecular mechanism of thalamus haemorrhage-induced central poststroke pain
Source: Front Immunol. 2023 Apr 20;14:1174008. doi: 10.3389/fimmu.2023.1174008 (PMC10157064; doi:10.3389/fimmu.2023.1174008)
Supplement: Appendix 1 — Marker genes specific to cell subtypes. [file Table_1.xls]

## Sheet: Sheet1
gene	Variant	Position	Eff. Allele	Trait	Beta	p-value	MAF	HWE	imp. score	ORbeta*
Apoe	rs143459034	45358026	T	I61 Intracerebral haemorrhage	0.00044805	0.29308	0.0107292	0.7443	0.959451	1.3
Apoe	rs71364511	45358181	A	I61 Intracerebral haemorrhage	4.54e-05	0.66248	0.232538	0.06273	0.969196	1.03
Apoe	rs7249933	45358235	T	I61 Intracerebral haemorrhage	5.7e-05	0.67028	0.122769	0.2373	0.961377	1.03
Apoe	rs10410835	45358353	C	I61 Intracerebral haemorrhage	7.63e-05	0.38577	0.476371	0.04276	0.964047	1.05
Apoe	rs192849087	45358575	A	I61 Intracerebral haemorrhage	7.98e-05	0.81806	0.0164242	0.6623	0.963864	1.05
Apoe	rs185347618	45358631	A	I61 Intracerebral haemorrhage	-0.0002165	0.6595	0.00853285	0.7457	0.914257	0.881
Apoe	rs2927466	45359148	G	I61 Intracerebral haemorrhage	4.29e-05	0.67973	0.232801	0.06671	0.968015	1.03
Apoe	rs375920298	45359451	T	I61 Intracerebral haemorrhage	-0.00059848	0.46586	0.00298353	0.1019	0.929413	0.704
Apoe	rs3112438	45359570	G	I61 Intracerebral haemorrhage	4.64e-05	0.65543	0.232988	0.08278	0.966826	1.03
Apoe	rs56317818	45359586	T	I61 Intracerebral haemorrhage	2.6e-05	0.79558	0.261219	0.932	0.962582	1.02
Apoe	rs41289514	45359667	G	I61 Intracerebral haemorrhage	0.00045826	0.28192	0.0106876	0.6839	0.968093	1.31
Apoe	rs12462573	45359706	A	I61 Intracerebral haemorrhage	2.35e-05	0.81445	0.260702	0.8502	0.962267	1.01
Apoe	rs75765623	45359776	T	I61 Intracerebral haemorrhage	7.2e-05	0.8354	0.0164278	0.7856	0.965286	1.04
Apoe	rs183610051	45359945	A	I61 Intracerebral haemorrhage	0.0012774	0.0019259	0.0116256	0.5996	0.957323	2.11
Apoe	rs375972689	45360488	G	I61 Intracerebral haemorrhage	0.00040368	0.3415	0.0107448	0.7467	0.964456	1.27
Apoe	rs2972557	45360573	A	I61 Intracerebral haemorrhage	-6.46e-05	0.61995	0.132494	0.8563	0.954084	0.963
Apoe	rs139397352	45360695	G	I61 Intracerebral haemorrhage	0.00028576	0.49543	0.0115399	0.1461	0.935573	1.18
Apoe	rs12463239	45360754	A	I61 Intracerebral haemorrhage	-8.1e-05	0.52366	0.142543	0.1794	0.947601	0.954
Apoe	rs8112526	45360762	G	I61 Intracerebral haemorrhage	-0.00012426	0.37206	0.114774	0.8572	0.945097	0.93
Apoe	rs440277	45361224	A	I61 Intracerebral haemorrhage	1.98e-05	0.83392	0.312036	0.07342	0.98655	1.01
Apoe	rs3852856	45361574	A	I61 Intracerebral haemorrhage	6.45e-06	0.95353	0.192998	0.1043	0.979963	1
Apoe	rs411920	45361632	C	I61 Intracerebral haemorrhage	2.78e-05	0.75625	0.375983	0.7132	0.994369	1.02
Apoe	rs365653	45361646	G	I61 Intracerebral haemorrhage	-8.05e-05	0.55705	0.115341	0.294	0.968359	0.954
Apoe	rs187045224	45361807	G	I61 Intracerebral haemorrhage	-0.00078975	0.23092	0.00460081	0.5483	0.936101	0.629
Apoe	rs418227	45361825	C	I61 Intracerebral haemorrhage	2.56e-05	0.77572	0.376325	0.6677	0.993847	1.02
Apoe	rs417193	45361960	C	I61 Intracerebral haemorrhage	2.37e-05	0.79128	0.376565	0.6625	0.99412	1.01
Apoe	rs143687838	45362033	A	I61 Intracerebral haemorrhage	-0.00028107	0.47864	0.0123566	0.01159	0.966033	0.848
Apoe	rs2436474	45362269	T	I61 Intracerebral haemorrhage	2.74e-05	0.75993	0.37598	0.716	0.995163	1.02
Apoe	rs151073910	45362302	T	I61 Intracerebral haemorrhage	-6.32e-05	0.89812	0.00838528	0.08767	0.916897	0.964
Apoe	rs377702	45362667	A	I61 Intracerebral haemorrhage	2.75e-05	0.75944	0.375972	0.7133	0.995656	1.02
Apoe	rs454050	45362809	A	I61 Intracerebral haemorrhage	2.51e-05	0.77959	0.376323	0.6678	0.994983	1.01
Apoe	rs387369	45363254	A	I61 Intracerebral haemorrhage	3.37e-05	0.7072	0.375073	0.7597	0.996504	1.02
Apoe	rs403155	45363299	T	I61 Intracerebral haemorrhage	3.34e-05	0.70917	0.375086	0.7736	0.996239	1.02
Apoe	rs12610257	45363392	T	I61 Intracerebral haemorrhage	-0.00012365	0.28006	0.175507	0.9669	0.984702	0.93
Apoe	rs12978931	45363700	G	I61 Intracerebral haemorrhage	-0.00010655	0.33567	0.191855	0.8814	0.982037	0.939
Apoe	rs384973	45363791	G	I61 Intracerebral haemorrhage	3.33e-05	0.70999	0.375072	0.7791	0.997052	1.02
Apoe	rs138607350	45363820	G	I61 Intracerebral haemorrhage	0.00062299	0.20971	0.0084411	0.7544	0.905693	1.44
Apoe	rs191160523	45363865	T	I61 Intracerebral haemorrhage	-0.00028099	0.47859	0.0123508	0.01467	0.967979	0.848
Apoe	rs411856	45364623	T	I61 Intracerebral haemorrhage	3.56e-05	0.69128	0.37613	0.8901	0.998326	1.02
Apoe	rs395683	45364782	G	I61 Intracerebral haemorrhage	3.52e-05	0.69435	0.37616	0.8872	0.998494	1.02
Apoe	rs395710	45364815	G	I61 Intracerebral haemorrhage	3.54e-05	0.69294	0.37615	0.8843	0.998528	1.02
Apoe	rs555608	45365072	G	I61 Intracerebral haemorrhage	3.54e-05	0.69243	0.376134	0.8872	0.998831	1.02
Apoe	rs2436475	45365248	C	I61 Intracerebral haemorrhage	3.5e-05	0.69608	0.376181	0.8843	0.999008	1.02
Apoe	rs11669109	45365476	C	I61 Intracerebral haemorrhage	3.48e-05	0.69717	0.376211	0.8843	0.999338	1.02
Apoe	rs12980613	45365604	G	I61 Intracerebral haemorrhage	3.48e-05	0.69774	0.376206	0.8958	0.999459	1.02
Apoe	rs12980631	45365641	C	I61 Intracerebral haemorrhage	3.47e-05	0.69809	0.37622	0.8901	0.999515	1.02
Apoe	rs11665829	45365817	G	I61 Intracerebral haemorrhage	-3.25e-05	0.71704	0.3765	0.4647	genotyped	0.981
Apoe	rs548011	45365961	G	I61 Intracerebral haemorrhage	3.28e-05	0.7142	0.376493	0.9305	0.999663	1.02
Apoe	rs415637	45366178	A	I61 Intracerebral haemorrhage	3.21e-05	0.71956	0.376611	0.9305	0.999454	1.02
Apoe	rs416116	45366345	A	I61 Intracerebral haemorrhage	3.32e-05	0.71072	0.37612	0.9275	0.998784	1.02
Apoe	rs403729	45366410	C	I61 Intracerebral haemorrhage	3.02e-05	0.7356	0.376873	0.9276	0.998703	1.02
Apoe	rs183427010	45366498	A	I61 Intracerebral haemorrhage	-0.00066296	0.26731	0.00579218	0.1614	0.906598	0.678
Apoe	rs521629	45366603	A	I61 Intracerebral haemorrhage	2.99e-05	0.73808	0.376909	0.9218	0.998632	1.02
Apoe	rs520566	45366656	A	I61 Intracerebral haemorrhage	3e-05	0.7376	0.37691	0.9276	0.9986	1.02
Apoe	rs519825	45366779	C	I61 Intracerebral haemorrhage	2.99e-05	0.73831	0.376909	0.9247	0.998464	1.02
Apoe	rs376938	45366830	G	I61 Intracerebral haemorrhage	3e-05	0.73771	0.376907	0.9305	0.998486	1.02
Apoe	rs394353	45367473	G	I61 Intracerebral haemorrhage	-4.12e-05	0.63735	0.448054	0.4683	0.990412	0.976
Apoe	rs73050216	45367502	C	I61 Intracerebral haemorrhage	-0.0001214	0.28852	0.175503	0.9058	0.986667	0.931
Apoe	rs8105340	45367777	T	I61 Intracerebral haemorrhage	-0.00011152	0.40291	0.122483	0.7331	0.978022	0.937
Apoe	rs112283362	45367905	G	I61 Intracerebral haemorrhage	3.56e-05	0.91723	0.016763	0.9582	0.95518	1.02
Apoe	rs520283	45368082	A	I61 Intracerebral haemorrhage	2.92e-05	0.74403	0.377036	0.971	0.997331	1.02
Apoe	rs419010	45368320	T	I61 Intracerebral haemorrhage	-4.14e-05	0.63578	0.447482	0.4704	0.990852	0.976
Apoe	rs394221	45368424	T	I61 Intracerebral haemorrhage	-4.07e-05	0.64149	0.447531	0.4768	0.991056	0.976
Apoe	rs112422902	45369203	A	I61 Intracerebral haemorrhage	-2.87e-05	0.90584	0.0336517	0.6556	0.978936	0.983
Apoe	rs78670068	45370151	T	I61 Intracerebral haemorrhage	0.0015063	0.045852	0.00354011	0.1237	0.929317	2.42
Apoe	rs41290098	45370278	T	I61 Intracerebral haemorrhage	-0.00012028	0.30695	0.169455	0.757	0.958244	0.932
Apoe	rs384653	45370335	A	I61 Intracerebral haemorrhage	3.52e-05	0.68694	0.447337	0.4262	0.990728	1.02
Apoe	rs511825	45370554	C	I61 Intracerebral haemorrhage	-2.78e-05	0.75642	0.375341	0.936	0.993956	0.984
Apoe	rs564724	45370649	G	I61 Intracerebral haemorrhage	-2.94e-05	0.74347	0.375129	0.9476	0.992986	0.983
Apoe	rs510297	45370673	A	I61 Intracerebral haemorrhage	-2.91e-05	0.74546	0.375171	0.9244	0.992925	0.983
Apoe	rs12610605	45370838	A	I61 Intracerebral haemorrhage	-9.08e-05	0.42401	0.179506	0.7752	0.984453	0.948
Apoe	rs416041	45370854	A	I61 Intracerebral haemorrhage	-2.81e-05	0.75463	0.375297	0.838	0.992093	0.984
Apoe	rs41290100	45370941	T	I61 Intracerebral haemorrhage	6.85e-05	0.79933	0.0281675	0.5393	0.930436	1.04
Apoe	rs150358728	45371093	T	I61 Intracerebral haemorrhage	-0.00042975	0.25978	0.0140829	0.8997	0.925705	0.777
Apoe	rs4803766	45371168	A	I61 Intracerebral haemorrhage	4.06e-05	0.64285	0.438737	0.4473	0.992132	1.02
Apoe	rs41290102	45371188	C	I61 Intracerebral haemorrhage	0.00068129	0.098105	0.0114	1.87e-16	genotyped	1.49
Apoe	rs149529419	45371328	A	I61 Intracerebral haemorrhage	0.000127	0.71641	0.0159055	0.8695	0.981694	1.08
Apoe	rs147483424	45372030	T	I61 Intracerebral haemorrhage	-0.00037905	0.33125	0.0126031	0.03029	0.983554	0.801
Apoe	rs561778352	45372039	A	I61 Intracerebral haemorrhage	0.00026137	0.81311	0.00167287	0.2321	0.90841	1.17
Apoe	rs58521715	45372129	T	I61 Intracerebral haemorrhage	-4.46e-05	0.64702	0.273094	0.5963	0.998539	0.974
Apoe	rs60389450	45372184	C	I61 Intracerebral haemorrhage	-5.34e-05	0.59086	0.256751	0.6799	0.997545	0.969
Apoe	rs17561351	45372329	G	I61 Intracerebral haemorrhage	-0.00013675	0.44238	0.0638413	0.6038	0.991659	0.923
Apoe	rs8104483	45372354	T	I61 Intracerebral haemorrhage	3.08e-05	0.75214	0.2722	0.1879	genotyped	1.02
Apoe	rs404935	45372794	A	I61 Intracerebral haemorrhage	0.00012876	0.26824	0.167846	0.1305	0.995562	1.08
Apoe	rs4803767	45372959	T	I61 Intracerebral haemorrhage	-6.09e-05	0.53989	0.256576	0.6861	0.996882	0.965
Apoe	rs11879589	45373276	G	I61 Intracerebral haemorrhage	0.00013453	0.36841	0.09286	0.3083	genotyped	1.08
Apoe	rs3852857	45373539	C	I61 Intracerebral haemorrhage	-0.00013913	0.35155	0.0929574	0.8948	0.998451	0.922
Apoe	rs395908	45373565	A	I61 Intracerebral haemorrhage	0.00012348	0.288	0.168059	0.1322	0.996565	1.08
Apoe	rs4081918	45373739	G	I61 Intracerebral haemorrhage	-0.00015086	0.31272	0.0928779	0.9269	0.998068	0.915
Apoe	rs140269962	45374101	G	I61 Intracerebral haemorrhage	0.00014104	0.88221	0.00227025	0.4093	0.903896	1.09
Apoe	rs79074020	45374350	C	I61 Intracerebral haemorrhage	-0.00016331	0.275	0.0927465	0.6908	0.997217	0.909
Apoe	Affx-52206012	45375164	C	I61 Intracerebral haemorrhage	0.00055251	0.49476	0.002886	0.08246	genotyped	1.38
Apoe	rs41290104	45375164	T	I61 Intracerebral haemorrhage	-0.00055582	0.49053	0.00289654	1	1	0.722
Apoe	rs71352236	45375413	A	I61 Intracerebral haemorrhage	-0.00029213	0.38015	0.0187833	0.4383	0.90993	0.843
Apoe	rs73936966	45376265	C	I61 Intracerebral haemorrhage	6.59e-06	0.99574	0.00125348	1	0.96837	1
Apoe	rs519113	45376284	C	I61 Intracerebral haemorrhage	-2.79e-05	0.7831	0.2431	0.2063	genotyped	0.984
Apoe	rs11671274	45376317	G	I61 Intracerebral haemorrhage	-0.00010549	0.55963	0.061451	0.2903	0.997233	0.94
Apoe	rs11672399	45377098	C	I61 Intracerebral haemorrhage	0.00019739	0.23518	0.07365	0.00632	genotyped	1.12
Apoe	rs393584	45377334	A	I61 Intracerebral haemorrhage	1.59e-05	0.86045	0.355229	0.8114	0.99561	1.01
Apoe	rs2075642	45377467	G	I61 Intracerebral haemorrhage	2.81e-05	0.79652	0.1969	0.05915	genotyped	1.02
Apoe	rs41290108	45377842	C	I61 Intracerebral haemorrhage	-4.78e-05	0.83163	0.0392509	0.6523	0.983366	0.972
Apoe	rs34278513	45378144	T	I61 Intracerebral haemorrhage	0.00010461	0.43545	0.119372	0.388	0.992932	1.06
Apoe	rs536212810	45378583	T	I61 Intracerebral haemorrhage	0.0032273	0.0039406	0.00161354	1	0.917314	6.63
Apoe	rs11665676	45378719	T	I61 Intracerebral haemorrhage	-0.00017528	0.37072	0.0519701	0.5634	0.994672	0.902
Apoe	rs41290110	45378770	A	I61 Intracerebral haemorrhage	-0.00046602	0.23581	0.012377	0.02356	0.987353	0.761
Apoe	rs387976	45379060	C	I61 Intracerebral haemorrhage	4.44e-06	0.96095	0.354722	0.679	0.994453	1
Apoe	rs3852859	45379309	T	I61 Intracerebral haemorrhage	1.64e-05	0.88014	0.1985	0.1451	genotyped	1.01
Apoe	rs369599	45379336	T	I61 Intracerebral haemorrhage	-2.63e-05	0.78027	0.30599	0.3511	0.992308	0.985
Apoe	rs412776	45379516	A	I61 Intracerebral haemorrhage	9.14e-05	0.49657	0.118834	0.4181	0.992899	1.06
Apoe	rs370705	45379638	T	I61 Intracerebral haemorrhage	-2.73e-05	0.77276	0.305795	0.351	0.992214	0.984
Apoe	rs73050293	45379746	G	I61 Intracerebral haemorrhage	5.21e-05	0.6889	0.131031	0.6532	0.971967	1.03
Apoe	rs11667640	45379791	T	I61 Intracerebral haemorrhage	-0.00023911	0.17673	0.0644226	0.2245	0.995395	0.869
Apoe	rs419925	45380126	C	I61 Intracerebral haemorrhage	-2.83e-05	0.76483	0.305709	0.3447	0.991114	0.984
Apoe	rs77196615	45380335	T	I61 Intracerebral haemorrhage	0.0002278	0.5055	0.0164	0.1121	genotyped	1.14
Apoe	rs421812	45380545	T	I61 Intracerebral haemorrhage	-2.29e-05	0.80847	0.305727	0.3445	0.990222	0.987
Apoe	rs3865427	45380961	A	I61 Intracerebral haemorrhage	9.65e-05	0.47426	0.118567	0.4642	0.988575	1.06
Apoe	rs11668861	45380970	T	I61 Intracerebral haemorrhage	-0.00012168	0.16361	0.456671	0.4562	0.991548	0.931
Apoe	rs150639620	45381292	T	I61 Intracerebral haemorrhage	-0.0001766	0.37106	0.051631	0.5357	0.982724	0.902
Apoe	rs144454647	45381860	C	I61 Intracerebral haemorrhage	-0.0027765	0.081033	0.000741	0.173	genotyped	0.196
Apoe	rs3729640	45381917	T	I61 Intracerebral haemorrhage	-3.33e-05	0.75645	0.206758	0.4463	0.989492	0.981
Apoe	rs6859	45382034	G	I61 Intracerebral haemorrhage	-4.49e-05	0.60904	0.4222	0.8831	genotyped	0.974
Apoe	rs777578636	45382152	A	I61 Intracerebral haemorrhage	0.0018921	0.087695	0.00161346	1	0.949764	3.03
Apoe	rs41290120	45382675	A	I61 Intracerebral haemorrhage	0.00018159	0.36819	0.0488499	0.2176	0.990401	1.11
Apoe	rs406456	45382717	A	I61 Intracerebral haemorrhage	-6.48e-05	0.46854	0.388937	0.5521	0.987271	0.963
Apoe	rs528419326	45382904	T	I61 Intracerebral haemorrhage	-0.00075657	0.43607	0.00214582	0.1996	0.918049	0.642
Apoe	rs3852860	45382966	C	I61 Intracerebral haemorrhage	6.2e-05	0.48106	0.4172	0.3082	genotyped	1.04
Apoe	rs11669338	45382984	G	I61 Intracerebral haemorrhage	-0.00012439	0.40723	0.0928111	0.6757	0.988889	0.93
Apoe	rs73050302	45382996	G	I61 Intracerebral haemorrhage	0.00045047	0.34595	0.00903967	0.8368	0.91052	1.3
Apoe	rs11673139	45383037	T	I61 Intracerebral haemorrhage	-0.00012447	0.40699	0.0928137	0.6534	0.988508	0.93
Apoe	rs3852861	45383061	T	I61 Intracerebral haemorrhage	-5.9e-05	0.50195	0.417507	0.7788	0.998192	0.966
Apoe	rs71352237	45383079	C	I61 Intracerebral haemorrhage	0.00010919	0.42209	0.116583	0.9143	0.983619	1.07
Apoe	rs34224078	45383115	G	I61 Intracerebral haemorrhage	0.00011042	0.41732	0.116528	0.8815	0.981652	1.07
Apoe	rs35879138	45383139	A	I61 Intracerebral haemorrhage	0.00010757	0.42906	0.116685	0.8817	0.982195	1.07
Apoe	rs577425827	45383486	T	I61 Intracerebral haemorrhage	-0.0002182	0.66756	0.00763929	0.5636	0.958404	0.88
Apoe	rs143254941	45383562	A	I61 Intracerebral haemorrhage	0.00022236	0.54867	0.0146476	0.8119	0.939377	1.14
Apoe	rs41290122	45383583	A	I61 Intracerebral haemorrhage	-0.00046991	0.23211	0.0124186	0.03297	0.982823	0.759
Apoe	rs183161720	45383808	A	I61 Intracerebral haemorrhage	-0.00035685	0.43033	0.0101483	0.5278	0.902229	0.811
Apoe	rs148303016	45383830	T	I61 Intracerebral haemorrhage	-0.00018506	0.34233	0.053115	0.5446	0.980227	0.897
Apoe	rs11083749	45384105	T	I61 Intracerebral haemorrhage	-5.24e-05	0.54912	0.482282	0.2256	0.9825	0.97
Apoe	rs406315	45384116	A	I61 Intracerebral haemorrhage	-7.2e-05	0.42616	0.370617	0.4871	0.982235	0.959
Apoe	rs73052307	45384405	C	I61 Intracerebral haemorrhage	-5.42e-05	0.65909	0.148641	0.4297	0.980799	0.969
Apoe	rs79701229	45384931	A	I61 Intracerebral haemorrhage	0.0010978	0.0038541	0.0136971	0.9488	0.956461	1.9
Apoe	rs78754926	45385102	A	I61 Intracerebral haemorrhage	-0.00069439	0.087747	0.0117618	0.1865	0.961468	0.666
Apoe	rs368375013	45385134	T	I61 Intracerebral haemorrhage	0.0014448	0.12885	0.00224279	1	0.922623	2.33
Apoe	rs144261139	45385356	A	I61 Intracerebral haemorrhage	0.00018117	0.65101	0.0121256	0.7708	0.971647	1.11
Apoe	rs116967764	45385389	G	I61 Intracerebral haemorrhage	-0.00013189	0.70247	0.01618	1.2e-10	genotyped	0.926
Apoe	rs369077933	45385421	C	I61 Intracerebral haemorrhage	0.00033393	0.7662	0.00161427	1	0.923024	1.22
Apoe	rs3745150	45385759	C	I61 Intracerebral haemorrhage	3.67e-05	0.68238	0.39333	0.1687	0.974499	1.02
Apoe	rs3745151	45385918	T	I61 Intracerebral haemorrhage	0.00020422	0.82215	0.00240273	0.1396	0.943503	1.13
Apoe	rs10420036	45386029	A	I61 Intracerebral haemorrhage	-0.00067486	0.10805	0.0110399	0.3631	0.957322	0.673
Apoe	rs76725281	45386460	G	I61 Intracerebral haemorrhage	-0.00031991	0.51263	0.00801168	0.04671	0.984365	0.829
Apoe	rs147636938	45386634	T	I61 Intracerebral haemorrhage	0.00025829	0.35452	0.0252339	0.4007	0.976811	1.16
Apoe	rs283808	45387034	C	I61 Intracerebral haemorrhage	-3.7e-05	0.86846	0.0397949	0.06521	0.977225	0.979
Apoe	rs283809	45387057	G	I61 Intracerebral haemorrhage	-3.69e-05	0.86898	0.0397868	0.07206	0.977334	0.979
Apoe	rs12972156	45387459	G	I61 Intracerebral haemorrhage	0.00017403	0.15658	0.148333	0.477	0.984489	1.11
Apoe	rs181518580	45387484	C	I61 Intracerebral haemorrhage	-0.0011167	0.13287	0.00350222	0.2994	0.968644	0.52
Apoe	rs12972970	45387596	A	I61 Intracerebral haemorrhage	0.00017273	0.15944	0.148428	0.4484	0.985246	1.11
Apoe	rs34342646	45388130	A	I61 Intracerebral haemorrhage	0.00014373	0.23747	0.15169	0.3929	0.985712	1.09
Apoe	rs283810	45388241	G	I61 Intracerebral haemorrhage	8.24e-05	0.64127	0.0650901	0.05224	0.984929	1.05
Apoe	rs283813	45389174	A	I61 Intracerebral haemorrhage	2.36e-05	0.89079	0.0688187	0.191	0.989391	1.01
Apoe	rs283814	45389224	G	I61 Intracerebral haemorrhage	5.09e-05	0.75282	0.07816	0.5534	genotyped	1.03
Apoe	rs7254892	45389596	G	I61 Intracerebral haemorrhage	-6.41e-05	0.79685	0.03141	0.4657	genotyped	0.963
Apoe	rs142934707	45389776	A	I61 Intracerebral haemorrhage	-0.00020917	0.66486	0.00815488	0.1101	0.993669	0.885
Apoe	rs283815	45390333	G	I61 Intracerebral haemorrhage	0.00013878	0.18969	0.21521	0.3135	0.994152	1.08
Apoe	rs41290128	45391505	G	I61 Intracerebral haemorrhage	0.00020133	0.67723	0.008108	0.9147	genotyped	1.13
Apoe	rs373193858	45391741	T	I61 Intracerebral haemorrhage	-0.0011287	0.12013	0.00363559	0.4646	0.977375	0.516
Apoe	rs145067941	45391941	T	I61 Intracerebral haemorrhage	2.69e-05	0.96547	0.00508499	0.4925	0.95919	1.02
Apoe	rs6857	45392254	T	I61 Intracerebral haemorrhage	0.0001949	0.091136	0.171059	0.6661	0.99456	1.12
Apoe	rs45438598	45392580	A	I61 Intracerebral haemorrhage	-0.0011318	0.11807	0.00365461	0.4684	0.978081	0.515
Apoe	rs117310449	45393516	T	I61 Intracerebral haemorrhage	0.00022377	0.57593	0.0120341	0.6138	0.981405	1.14
Apoe	rs561654715	45394204	A	I61 Intracerebral haemorrhage	0.001557	0.048399	0.00316422	0.2699	0.955909	2.49
Apoe	rs76692773	45394211	T	I61 Intracerebral haemorrhage	-6.47e-05	0.69027	0.0830289	0.7685	0.931193	0.963
Apoe	rs71352238	45394336	C	I61 Intracerebral haemorrhage	0.00013541	0.26695	0.148891	0.4446	0.997353	1.08
Apoe	rs144590550	45394470	T	I61 Intracerebral haemorrhage	-0.0011296	0.11836	0.0036517	0.4677	0.981168	0.516
Apoe	rs184017	45394969	G	I61 Intracerebral haemorrhage	0.00014161	0.18006	0.215113	0.3642	0.998021	1.09
Apoe	rs78245864	45395193	C	I61 Intracerebral haemorrhage	-0.00027828	0.56311	0.00817879	0.1086	0.996048	0.85
Apoe	rs157580	45395266	A	I61 Intracerebral haemorrhage	0.00014116	0.11127	0.3947	0.277	genotyped	1.09
Apoe	rs2075649	45395330	G	I61 Intracerebral haemorrhage	3.94e-05	0.65751	0.389473	0.3114	0.997523	1.02
Apoe	rs2075650	45395619	A	I61 Intracerebral haemorrhage	-0.00016227	0.18715	0.146	0.1561	genotyped	0.909
Apoe	rs157581	45395714	T	I61 Intracerebral haemorrhage	-0.00014542	0.1684	0.2158	0.135	genotyped	0.918
Apoe	rs73936968	45395816	G	I61 Intracerebral haemorrhage	-0.00031198	0.28113	0.02298	0.5959	genotyped	0.833
Apoe	rs34095326	45395844	A	I61 Intracerebral haemorrhage	0.00013676	0.31845	0.113746	1	0.990754	1.08
Apoe	rs151285748	45395875	A	I61 Intracerebral haemorrhage	2.8e-05	0.96014	0.00610958	0.3252	0.976707	1.02
Apoe	rs34404554	45395909	G	I61 Intracerebral haemorrhage	0.00016248	0.18603	0.145937	0.5262	0.999309	1.1
Apoe	rs11556505	45396144	T	I61 Intracerebral haemorrhage	0.00016185	0.18776	0.145954	0.5352	0.999103	1.1
Apoe	rs157582	45396219	T	I61 Intracerebral haemorrhage	0.00014262	0.1772	0.214825	0.3179	0.99852	1.09
Apoe	rs4803768	45396276	A	I61 Intracerebral haemorrhage	-0.00020203	0.74884	0.00517318	0.1414	0.909745	0.888
Apoe	rs775397018	45396363	T	I61 Intracerebral haemorrhage	0.0033142	0.0032156	0.00160409	1	0.915494	6.98
Apoe	rs59007384	45396665	T	I61 Intracerebral haemorrhage	0.00016045	0.13557	0.206321	0.2398	0.992556	1.1
Apoe	rs157584	45396899	C	I61 Intracerebral haemorrhage	6.56e-05	0.45069	0.463519	0.07354	0.995372	1.04
Apoe	rs77301115	45396973	A	I61 Intracerebral haemorrhage	0.00024411	0.37253	0.0259053	0.6367	0.991164	1.15
Apoe	rs73936970	45397171	C	I61 Intracerebral haemorrhage	-0.00012625	0.79177	0.00831519	0.1385	0.985948	0.929
Apoe	rs1160983	45397229	A	I61 Intracerebral haemorrhage	8.62e-05	0.73377	0.0302642	0.5819	0.990176	1.05
Apoe	rs112849259	45397307	T	I61 Intracerebral haemorrhage	0.00023948	0.38111	0.0259747	0.7617	0.991192	1.15
Apoe	rs157585	45397512	C	I61 Intracerebral haemorrhage	4.68e-05	0.59047	0.458424	0.0793	0.995793	1.03
Apoe	rs116881820	45397952	C	I61 Intracerebral haemorrhage	0.00023586	0.38805	0.0260242	0.6374	0.990748	1.15
Apoe	rs157588	45398264	T	I61 Intracerebral haemorrhage	4.26e-05	0.6245	0.458406	0.0842	0.995461	1.03
Apoe	rs11668327	45398633	C	I61 Intracerebral haemorrhage	-5.71e-05	0.62047	0.175651	0.6975	0.974078	0.967
Apoe	rs157590	45398716	C	I61 Intracerebral haemorrhage	3.86e-05	0.65799	0.46421	0.0946	0.99009	1.02
Apoe	rs79398853	45398785	T	I61 Intracerebral haemorrhage	0.00023637	0.38738	0.0259892	0.6857	0.99068	1.15
Apoe	rs2238681	45398817	T	I61 Intracerebral haemorrhage	1.2e-05	0.89288	0.393083	0.2393	0.994289	1.01
Apoe	rs75687619	45399344	T	I61 Intracerebral haemorrhage	0.00023636	0.3875	0.0259857	0.6856	0.990443	1.15
Apoe	rs139399286	45399356	A	I61 Intracerebral haemorrhage	-0.00043726	0.28423	0.012518	0.7135	0.900343	0.774
Apoe	rs140684051	45399456	T	I61 Intracerebral haemorrhage	9.67e-05	0.80908	0.0130542	0.8352	0.906564	1.06
Apoe	rs76366838	45399896	A	I61 Intracerebral haemorrhage	0.00023278	0.39453	0.0260233	0.7109	0.989919	1.15
Apoe	rs114536010	45400725	T	I61 Intracerebral haemorrhage	0.00023362	0.39289	0.0260127	0.685	0.99021	1.15
Apoe	rs61679753	45400747	A	I61 Intracerebral haemorrhage	8.98e-05	0.72303	0.0303051	0.5418	0.992514	1.05
Apoe	rs116874600	45400871	A	I61 Intracerebral haemorrhage	-0.00013632	0.77776	0.00816656	0.1054	0.988074	0.923
Apoe	rs73052317	45401211	A	I61 Intracerebral haemorrhage	-0.00086102	0.24225	0.00380252	1	0.907668	0.604
Apoe	rs8106922	45401666	G	I61 Intracerebral haemorrhage	2.66e-05	0.76495	0.39372	0.3113	0.993852	1.02
Apoe	rs118170342	45401868	C	I61 Intracerebral haemorrhage	0.00025453	0.25233	0.0407529	0.8945	0.966106	1.16
Apoe	rs34878901	45402477	T	I61 Intracerebral haemorrhage	2.07e-05	0.81524	0.392786	0.4082	0.997165	1.01
Apoe	rs35568738	45402718	C	I61 Intracerebral haemorrhage	-1.36e-05	0.94155	0.0581795	0.673	0.989256	0.992
Apoe	rs115881343	45403216	T	I61 Intracerebral haemorrhage	0.00014519	0.58296	0.027831	0.3595	0.992344	1.09
Apoe	rs1160985	45403412	C	I61 Intracerebral haemorrhage	-2.79e-05	0.74981	0.4311	0.4152	genotyped	0.984
Apoe	rs760136	45403858	G	I61 Intracerebral haemorrhage	2.53e-05	0.77211	0.431425	0.1175	0.999451	1.01
Apoe	rs1160984	45403924	T	I61 Intracerebral haemorrhage	-1.79e-05	0.92343	0.058295	0.7313	0.990675	0.99
Apoe	rs142412517	45404058	T	I61 Intracerebral haemorrhage	0.00040731	0.7228	0.0015639	1	0.911896	1.27
Apoe	rs73052321	45404121	A	I61 Intracerebral haemorrhage	0.00077617	0.13195	0.00769265	0.5381	0.921251	1.58
Apoe	rs741780	45404431	C	I61 Intracerebral haemorrhage	2.48e-05	0.77674	0.431442	0.1199	0.998859	1.01
Apoe	rs117264457	45404432	G	I61 Intracerebral haemorrhage	-7.07e-05	0.8004	0.02462	0.8068	genotyped	0.959
Apoe	rs405697	45404691	G	I61 Intracerebral haemorrhage	0.00012408	0.20376	0.276413	0.7901	0.98313	1.08
Apoe	rs116977783	45404721	T	I61 Intracerebral haemorrhage	-0.00016511	0.7318	0.0082427	0.1089	0.984126	0.908
Apoe	rs112019714	45404857	C	I61 Intracerebral haemorrhage	0.00014263	0.58947	0.0278724	0.3768	0.991889	1.09
Apoe	rs1038025	45404972	C	I61 Intracerebral haemorrhage	2.4e-05	0.78416	0.431501	0.1199	0.998431	1.01
Apoe	rs1038026	45405062	G	I61 Intracerebral haemorrhage	2.38e-05	0.78543	0.431529	0.1216	0.998184	1.01
Apoe	rs149311267	45405113	A	I61 Intracerebral haemorrhage	-0.00015557	0.74756	0.00818981	0.1053	0.983505	0.913
Apoe	rs141864196	45405499	A	I61 Intracerebral haemorrhage	-0.00031386	0.24467	0.0268169	0.8955	0.988787	0.832
Apoe	rs1305062	45405521	C	I61 Intracerebral haemorrhage	1.83e-05	0.83698	0.392746	0.3957	0.997001	1.01
Apoe	rs10119	45406673	A	I61 Intracerebral haemorrhage	8.88e-05	0.3568	0.290578	0.632	0.980499	1.05
Apoe	rs7256173	45407655	T	I61 Intracerebral haemorrhage	-0.00029414	0.54409	0.00817634	0.06553	0.976167	0.842
Apoe	rs7259620	45407788	A	I61 Intracerebral haemorrhage	2.67e-05	0.76058	0.430648	0.1245	0.995548	1.02
Apoe	rs449647	45408564	T	I61 Intracerebral haemorrhage	-7.29e-05	0.54587	0.164355	0.8458	0.934371	0.958
Apoe	rs769446	45408628	C	I61 Intracerebral haemorrhage	-0.00010185	0.50253	0.0968124	0.3335	0.92497	0.942
Apoe	rs405509	45408836	G	I61 Intracerebral haemorrhage	3.81e-05	0.66093	0.4881	0.4237	genotyped	1.02
Apoe	rs440446	45409167	G	I61 Intracerebral haemorrhage	0.00015501	0.087015	0.359704	0.8904	0.993786	1.1
Apoe	rs769448	45409579	T	I61 Intracerebral haemorrhage	-0.00017029	0.5503	0.025792	0.1783	0.916244	0.905
Apoe	rs769449	45410002	G	I61 Intracerebral haemorrhage	-0.00019854	0.13012	0.1256	0.305	genotyped	0.89
Apoe	rs769450	45410444	G	I61 Intracerebral haemorrhage	-7.55e-06	0.93218	0.396	0.8137	genotyped	0.996
Apoe	rs769452	45411110	C	I61 Intracerebral haemorrhage	0.00042332	0.69604	0.00160305	0.5493	1	1.28
Apoe	rs429358	45411941	C	I61 Intracerebral haemorrhage	0.00020775	0.083154	0.154841	0.266	1	1.13
Apoe	rs7412	45412079	T	I61 Intracerebral haemorrhage	0.0001421	0.37311	0.0803955	0.3412	1	1.09
Apoe	rs1081105	45412955	C	I61 Intracerebral haemorrhage	0.00017671	0.50465	0.0276668	0.2972	0.994969	1.11
Apoe	rs1081106	45413366	C	I61 Intracerebral haemorrhage	2.7e-06	0.98699	0.0806833	0.3625	0.918627	1
Apoe	rs75627662	45413576	T	I61 Intracerebral haemorrhage	0.00020369	0.05776	0.205819	0.8517	0.99675	1.13
Apoe	rs72654472	45414392	G	I61 Intracerebral haemorrhage	0.00030963	0.24917	0.02678	0.4924	genotyped	1.2
Apoe	rs72654473	45414399	A	I61 Intracerebral haemorrhage	0.00017441	0.212	0.108032	0.6786	0.99723	1.11
Apoe	rs439401	45414451	C	I61 Intracerebral haemorrhage	0.00014941	0.098026	0.3619	0.236	genotyped	1.09
Apoe	rs138235833	45415285	G	I61 Intracerebral haemorrhage	-0.00022836	0.31974	0.0392862	0.7572	0.939836	0.875
Apoe	rs547648737	45415296	T	I61 Intracerebral haemorrhage	0.0026771	0.0021615	0.0026315	0.4851	0.938494	4.8
Apoe	rs445925	45415640	G	I61 Intracerebral haemorrhage	-0.0001826	0.19061	0.1084	0.7989	genotyped	0.899
Apoe	rs10414043	45415713	A	I61 Intracerebral haemorrhage	0.00018679	0.15212	0.127324	0.9756	0.99157	1.12
Apoe	rs7256200	45415935	T	I61 Intracerebral haemorrhage	0.00019688	0.13106	0.127445	1	0.991249	1.12
Apoe	rs483082	45416178	T	I61 Intracerebral haemorrhage	0.00021125	0.038962	0.236047	0.8026	0.993498	1.13
Apoe	rs59325138	45416291	T	I61 Intracerebral haemorrhage	-5.46e-06	0.95097	0.400586	0.3989	0.99139	0.997
Apoe	rs584007	45416478	G	I61 Intracerebral haemorrhage	0.00015385	0.089701	0.358878	0.2894	0.993829	1.09
Apoe	rs438811	45416741	T	I61 Intracerebral haemorrhage	0.00021103	0.039171	0.2361	0.8099	0.993213	1.13
Apoe	rs390082	45416831	G	I61 Intracerebral haemorrhage	0.00018043	0.19566	0.108611	0.6422	0.99683	1.11
Apoe	rs72654447	45417527	A	I61 Intracerebral haemorrhage	-0.0012688	0.18177	0.00218253	1	0.943104	0.475
Apoe	rs66807996	45417575	T	I61 Intracerebral haemorrhage	0.00041664	0.33642	0.0105813	0.9311	0.950483	1.28
Apoe	rs72654449	45417618	A	I61 Intracerebral haemorrhage	-0.0012673	0.1818	0.00218868	1	0.943094	0.476
Apoe	rs5117	45418790	C	I61 Intracerebral haemorrhage	0.00020048	0.050647	0.235168	0.917	0.991319	1.12
Apoe	rs3925681	45421100	A	I61 Intracerebral haemorrhage	-7.84e-05	0.38137	0.41869	0.5976	0.955946	0.955
Apoe	rs150966173	45421204	T	I61 Intracerebral haemorrhage	0.00020685	0.43385	0.0279933	0.2091	0.986493	1.13
Apoe	rs12721046	45421254	A	I61 Intracerebral haemorrhage	0.00023748	0.046433	0.157739	0.9847	0.992638	1.15
Apoe	rs12721056	45421744	T	I61 Intracerebral haemorrhage	-2.83e-05	0.75987	0.344462	0.852	0.964557	0.984
Apoe	rs12721051	45422160	G	I61 Intracerebral haemorrhage	0.00025371	0.022011	0.189192	0.8552	0.996947	1.16
Apoe	rs1064725	45422561	G	I61 Intracerebral haemorrhage	-0.00030486	0.17655	0.0414137	0.9457	0.923876	0.836
Apoe	rs56131196	45422846	A	I61 Intracerebral haemorrhage	0.00025165	0.02296	0.189397	0.8813	0.999105	1.16
Apoe	rs4420638	45422946	A	I61 Intracerebral haemorrhage	-0.00024366	0.027867	0.1895	0.2884	genotyped	0.867
Apoe	rs78959900	45423636	A	I61 Intracerebral haemorrhage	-3.19e-05	0.73165	0.342094	0.9087	0.957653	0.981
Apoe	rs144311893	45423944	T	I61 Intracerebral haemorrhage	4.5e-05	0.88215	0.0221478	0.4854	0.939516	1.03
Apoe	rs157595	45425460	G	I61 Intracerebral haemorrhage	0.00011946	0.19088	0.383165	0.1859	0.950904	1.07
Apoe	rs750836130	45425645	A	I61 Intracerebral haemorrhage	0.0032828	0.0034524	0.00160892	1	0.916829	6.85
Apoe	rs75654248	45425762	G	I61 Intracerebral haemorrhage	7.3e-05	0.82638	0.0183789	0.1139	0.935183	1.04
Apoe	rs141622900	45426792	A	I61 Intracerebral haemorrhage	8.55e-05	0.66757	0.0524244	0.3927	0.945698	1.05
Apoe	rs111789331	45427125	A	I61 Intracerebral haemorrhage	0.00023745	0.050032	0.159037	0.7206	0.953847	1.15
Apoe	rs4803770	45427353	G	I61 Intracerebral haemorrhage	-3.34e-05	0.71711	0.376398	0.4002	0.937078	0.981
Apoe	rs4803771	45427648	C	I61 Intracerebral haemorrhage	0.00046479	0.13144	0.02018	0.06858	genotyped	1.31
Apoe	rs117664574	45427779	G	I61 Intracerebral haemorrhage	-0.00036626	0.18424	0.0268506	0.8429	0.943724	0.807
Apoe	rs66626994	45428234	A	I61 Intracerebral haemorrhage	0.00024395	0.045488	0.158678	0.5379	0.941536	1.15
Apoe	rs4803772	45428459	T	I61 Intracerebral haemorrhage	-4.56e-05	0.63302	0.338685	0.5524	0.915667	0.974
Apoe	rs11878790	45430417	T	I61 Intracerebral haemorrhage	-0.00013944	0.67029	0.01788	1	genotyped	0.922
Apoe	rs114448690	45431453	A	I61 Intracerebral haemorrhage	7.2e-05	0.6349	0.0913884	0.5101	0.97801	1.04
Apoe	rs113345881	45431636	G	I61 Intracerebral haemorrhage	0.00017616	0.21925	0.102953	0.5995	0.986918	1.11
Apoe	rs112871012	45431897	A	I61 Intracerebral haemorrhage	0.00018557	0.19502	0.102986	0.5495	0.989694	1.11
Apoe	rs7259350	45432278	C	I61 Intracerebral haemorrhage	0.00018373	0.19871	0.102947	0.5683	0.994789	1.11
Apoe	rs7259004	45432557	G	I61 Intracerebral haemorrhage	-0.00018016	0.20696	0.1028	0.6586	genotyped	0.9
Apoe	rs28795074	45436657	A	I61 Intracerebral haemorrhage	4.34e-05	0.78547	0.0867631	0.9566	0.923923	1.03
Apoe	rs114533385	45436753	T	I61 Intracerebral haemorrhage	0.0010077	0.017878	0.0111507	0.8717	0.919587	1.81
Apoe	rs141441332	45438575	A	I61 Intracerebral haemorrhage	0.0010334	0.01525	0.0112418	0.9344	0.918899	1.83
Apoe	rs73045691	45440529	A	I61 Intracerebral haemorrhage	8.61e-05	0.38501	0.302328	0.8829	0.900633	1.05
Apoe	rs78592970	45441283	T	I61 Intracerebral haemorrhage	-4e-05	0.75682	0.144224	0.6623	0.905387	0.977
Apoe	rs34041051	45442349	C	I61 Intracerebral haemorrhage	8.2e-05	0.40131	0.306508	0.7105	0.920668	1.05
Apoe	rs35336243	45442519	T	I61 Intracerebral haemorrhage	7.92e-05	0.41712	0.306832	0.7385	0.92267	1.05
Apoe	rs10413096	45442962	A	I61 Intracerebral haemorrhage	2.38e-05	0.79163	0.498816	0.817	0.919886	1.01
Apoe	rs73045696	45443088	C	I61 Intracerebral haemorrhage	7.1e-05	0.46526	0.306577	0.6821	0.928896	1.04
Apoe	rs59859410	45443504	G	I61 Intracerebral haemorrhage	6.98e-05	0.47141	0.308035	0.714	0.934058	1.04
Apoe	rs71352241	45443934	T	I61 Intracerebral haemorrhage	-0.00021472	0.37465	0.0356865	0.2783	0.925982	0.882
Apoe	rs117812557	45444126	T	I61 Intracerebral haemorrhage	0.00029975	0.45811	0.0124516	0.8317	0.931435	1.19
Apoe	rs112784534	45444566	T	I61 Intracerebral haemorrhage	7.43e-05	0.44056	0.307642	0.4377	0.945722	1.04
Apoe	rs76214972	45445506	G	I61 Intracerebral haemorrhage	-0.00021134	0.38609	0.0352033	0.3603	0.931101	0.884
Apoe	rs79429216	45445517	G	I61 Intracerebral haemorrhage	9.15e-05	0.81564	0.01234	0.08004	genotyped	1.06
Apoe	rs5157	45447161	C	I61 Intracerebral haemorrhage	1.94e-05	0.8251	0.498647	0.3677	0.970033	1.01
Apoe	rs5158	45447178	T	I61 Intracerebral haemorrhage	5.96e-07	0.9962	0.143635	0.02904	0.96678	1
Apoe	rs12721109	45447221	G	I61 Intracerebral haemorrhage	-0.00039595	0.14819	0.02575	0.7613	genotyped	0.793
Apoe	rs12721108	45447241	G	I61 Intracerebral haemorrhage	-0.00017175	0.70861	0.00895	0.004826	genotyped	0.904
Apoe	rs1132899	45448036	C	I61 Intracerebral haemorrhage	3.44e-05	0.69383	0.491122	0.2271	0.978435	1.02
Apoe	rs12691089	45448084	G	I61 Intracerebral haemorrhage	-0.0014104	0.080835	0.002895	0.1924	genotyped	0.438
Apoe	Affx-80288175	45448102	TG	I61 Intracerebral haemorrhage	0.0016665	0.63738	0.0001505	1	genotyped	2.66
Apoe	rs5167	45448465	T	I61 Intracerebral haemorrhage	-4e-05	0.65993	0.3506	0.4508	genotyped	0.977
Apoe	rs12721063	45449166	G	I61 Intracerebral haemorrhage	-0.00031073	0.4549	0.01097	0.4802	genotyped	0.834
Apoe	rs2288912	45449199	G	I61 Intracerebral haemorrhage	1.24e-05	0.88636	0.495295	0.2787	0.992101	1.01
Apoe	rs2288911	45449284	G	I61 Intracerebral haemorrhage	2.07e-05	0.81169	0.499824	0.3817	0.992508	1.01
Apoe	rs12709886	45449693	T	I61 Intracerebral haemorrhage	-0.00014949	0.53322	0.0348073	0.8389	0.970284	0.916
Apoe	rs9304644	45450033	T	I61 Intracerebral haemorrhage	3.62e-05	0.6783	0.452754	0.5192	0.99449	1.02
Apoe	rs12721076	45450252	C	I61 Intracerebral haemorrhage	-1.4e-05	0.91032	0.14283	0.01186	0.99069	0.992
Apoe	rs9304645	45450328	A	I61 Intracerebral haemorrhage	5.79e-05	0.60469	0.185445	0.007679	0.989478	1.03
Apoe	rs11879392	45450777	G	I61 Intracerebral haemorrhage	-1.9e-05	0.87894	0.142123	0.02072	0.989424	0.989
Apoe	rs10419086	45450852	G	I61 Intracerebral haemorrhage	-0.00015723	0.44414	0.0470525	0.1109	0.989946	0.912
Apoe	rs4803774	45450872	G	I61 Intracerebral haemorrhage	3.28e-05	0.70646	0.452976	0.5557	0.995203	1.02
Apoe	rs4803775	45450928	C	I61 Intracerebral haemorrhage	7.48e-06	0.93127	0.499855	0.4691	0.996408	1
Apoe	rs10420434	45451190	A	I61 Intracerebral haemorrhage	-0.00015655	0.44589	0.0470251	0.09956	0.991728	0.912
Apoe	rs7256684	45451442	G	I61 Intracerebral haemorrhage	2.91e-05	0.73794	0.453386	0.5284	0.996926	1.02
Apoe	rs5120	45451620	A	I61 Intracerebral haemorrhage	1.75e-07	0.99839	0.499595	0.4165	0.998263	1
Apoe	rs7257095	45451647	G	I61 Intracerebral haemorrhage	0.0005281	0.35075	0.00646669	0.2519	0.90397	1.36
Apoe	rs10422603	45451656	G	I61 Intracerebral haemorrhage	4.77e-05	0.66853	0.186096	0.00722	0.994099	1.03
Apoe	rs120074114	45452024	A	I61 Intracerebral haemorrhage	0.00042487	0.77071	0.0008816	1	genotyped	1.28
Apoe	rs4803776	45452335	C	I61 Intracerebral haemorrhage	-4.43e-06	0.95928	0.499494	0.4011	0.998717	0.997
Apoe	rs1130742	45452812	T	I61 Intracerebral haemorrhage	-8.29e-06	0.93263	0.266724	0.05746	0.996704	0.995
Apoe	rs10421404	45452845	A	I61 Intracerebral haemorrhage	3.92e-05	0.7247	0.186196	0.004632	0.995056	1.02
Apoe	rs7257468	45453144	T	I61 Intracerebral haemorrhage	2.74e-05	0.75322	0.454773	0.5375	0.996053	1.02
Apoe	rs7258345	45453151	G	I61 Intracerebral haemorrhage	2.7e-05	0.7567	0.454843	0.5443	0.996021	1.02
Apoe	rs7257476	45453165	T	I61 Intracerebral haemorrhage	2.71e-05	0.75613	0.45482	0.5466	0.996067	1.02
Apoe	rs12709889	45453239	A	I61 Intracerebral haemorrhage	3.99e-07	0.99675	0.266922	0.05707	0.997353	1
Apoe	rs10423208	45453656	A	I61 Intracerebral haemorrhage	2.25e-05	0.79586	0.453459	0.4953	0.999006	1.01
Apoe	rs10422888	45453763	G	I61 Intracerebral haemorrhage	-3.13e-05	0.79972	0.143565	0.006007	0.995804	0.982
Apoe	rs10402642	45453878	A	I61 Intracerebral haemorrhage	2.25e-05	0.79609	0.453456	0.4975	0.999038	1.01
Apoe	rs7246900	45454236	A	I61 Intracerebral haemorrhage	2.26e-05	0.79552	0.453308	0.5173	0.99967	1.01
Apoe	rs11083752	45454363	A	I61 Intracerebral haemorrhage	2.26e-05	0.79538	0.453471	0.5018	0.999047	1.01
Apoe	rs7248162	45454686	C	I61 Intracerebral haemorrhage	2.26e-05	0.79506	0.453482	0.5129	0.999115	1.01
Apoe	rs7247227	45454759	G	I61 Intracerebral haemorrhage	2.24e-05	0.79647	0.453344	0.5195	0.999741	1.01
Apoe	rs7247551	45454766	A	I61 Intracerebral haemorrhage	-3.14e-06	0.97113	0.4991	0.8375	genotyped	0.998
Apoe	rs892101	45455458	A	I61 Intracerebral haemorrhage	1.94e-05	0.82357	0.453138	0.5018	0.999743	1.01
Apoe	rs10413089	45455588	C	I61 Intracerebral haemorrhage	3.81e-05	0.73182	0.186182	0.005915	0.996009	1.02
Apoe	rs7251501	45455706	T	I61 Intracerebral haemorrhage	1.76e-05	0.83998	0.453664	0.4909	0.998251	1.01
Apoe	rs7251503	45455715	G	I61 Intracerebral haemorrhage	1.76e-05	0.83984	0.453662	0.4909	0.998243	1.01
Apoe	rs190651665	45456103	G	I61 Intracerebral haemorrhage	-0.00023389	0.33578	0.0329404	0.3444	0.999331	0.872
Apoe	rs4803779	45456497	C	I61 Intracerebral haemorrhage	1.91e-05	0.82647	0.453373	0.4974	0.99902	1.01
Apoe	rs4803780	45456628	T	I61 Intracerebral haemorrhage	1.94e-05	0.82389	0.453336	0.4909	0.999169	1.01
Apoe	rs12983572	45456832	C	I61 Intracerebral haemorrhage	-0.00016324	0.63157	0.0167735	0.6032	0.981186	0.909
Apoe	rs3760625	45456941	A	I61 Intracerebral haemorrhage	1.93e-05	0.82405	0.453335	0.4909	0.999202	1.01
Apoe	rs3760626	45457105	G	I61 Intracerebral haemorrhage	1.93e-05	0.82464	0.453344	0.4823	0.999222	1.01
Apoe	rs3760627	45457180	T	I61 Intracerebral haemorrhage	-1.62e-05	0.85294	0.4548	0.1521	genotyped	0.991
Apoe	rs3760628	45457225	A	I61 Intracerebral haemorrhage	1.85e-05	0.83153	0.453311	0.478	0.99912	1.01
Apoe	rs66867801	45457293	T	I61 Intracerebral haemorrhage	1.9e-05	0.82716	0.453287	0.4713	0.996756	1.01
Apoe	rs7259679	45457306	T	I61 Intracerebral haemorrhage	2.23e-05	0.79776	0.453476	0.465	0.995901	1.01
Apoe	rs66771331	45457319	A	I61 Intracerebral haemorrhage	1.03e-05	0.90571	0.452438	0.4443	0.998235	1.01
Apoe	rs73047641	45457377	A	I61 Intracerebral haemorrhage	1.26e-05	0.88455	0.452977	0.4887	0.999601	1.01
Apoe	rs10426750	45457684	C	I61 Intracerebral haemorrhage	1.59e-05	0.85515	0.453164	0.5084	0.999597	1.01
Apoe	rs3760629	45458146	C	I61 Intracerebral haemorrhage	1.83e-05	0.83366	0.453478	0.4695	0.998741	1.01
Apoe	rs117316645	45458212	A	I61 Intracerebral haemorrhage	0.00026874	0.2151	0.0419152	0.9488	0.988191	1.17
Apoe	rs41334244	45458235	G	I61 Intracerebral haemorrhage	0.0002454	0.25448	0.0424637	0.7839	0.988596	1.15
Apoe	rs143674704	45458466	G	I61 Intracerebral haemorrhage	5.31e-05	0.87528	0.0181852	0.7598	0.91152	1.03
Apoe	rs2238682	45458593	T	I61 Intracerebral haemorrhage	-8.66e-06	0.92958	0.266859	0.04947	0.99764	0.995
Apoe	rs7252480	45458925	T	I61 Intracerebral haemorrhage	-8.6e-06	0.93004	0.266856	0.04556	0.997688	0.995
Apoe	rs4803781	45459671	A	I61 Intracerebral haemorrhage	2.23e-05	0.7978	0.453554	0.4568	0.998273	1.01
Apoe	rs2239375	45459851	C	I61 Intracerebral haemorrhage	2.17e-05	0.80324	0.453645	0.4506	0.998281	1.01
Apoe	rs77659021	45460254	A	I61 Intracerebral haemorrhage	2.42e-05	0.93623	0.0214366	3.38e-34	1	1.01
Apoe	rs115873701	45460692	C	I61 Intracerebral haemorrhage	0.00044349	0.34133	0.00936579	0.9212	0.922253	1.3
Apoe	rs204905	45460764	A	I61 Intracerebral haemorrhage	-6.22e-06	0.94281	0.499356	0.3567	0.998865	0.996
Apoe	rs1882752	45461342	C	I61 Intracerebral haemorrhage	-1.39e-05	0.88644	0.27236	0.0412	0.997852	0.992
Apoe	rs204906	45461980	C	I61 Intracerebral haemorrhage	0.0003266	0.17972	0.03305	0.1055	genotyped	1.21
Apoe	rs204907	45461996	G	I61 Intracerebral haemorrhage	-0.00012169	0.54246	0.0498947	0.6365	0.990488	0.931
Apoe	rs61062133	45463256	G	I61 Intracerebral haemorrhage	0.00024566	0.25387	0.0424717	0.784	0.988695	1.15
Apoe	rs204910	45463385	T	I61 Intracerebral haemorrhage	-0.00024057	0.32134	0.0330675	0.5182	0.9989	0.868
Apoe	rs116949436	45463386	A	I61 Intracerebral haemorrhage	-0.0001427	0.73323	0.010999	0.4319	0.977182	0.92
Apoe	rs576651896	45463398	G	I61 Intracerebral haemorrhage	0.0011515	0.051702	0.00581314	0.4545	0.921786	1.96
Apoe	rs204911	45463540	A	I61 Intracerebral haemorrhage	-0.00023877	0.3251	0.0330348	0.4839	0.999336	0.869
Abca1	rs12348106	107493297	T	I61 Intracerebral haemorrhage	0.001664	0.2261	0.00103682	1	0.941269	2.65
Abca1	rs12338711	107493329	A	I61 Intracerebral haemorrhage	2.04e-05	0.84462	0.224002	0.5905	0.997349	1.01
Abca1	rs7357744	107494546	G	I61 Intracerebral haemorrhage	2.03e-05	0.84577	0.224023	0.604	0.997208	1.01
Abca1	rs792503	107494862	G	I61 Intracerebral haemorrhage	2.09e-05	0.80985	0.474176	0.6409	0.993722	1.01
Abca1	rs149795530	107496153	G	I61 Intracerebral haemorrhage	0.00018234	0.72104	0.00779925	0.4354	0.92794	1.11
Abca1	rs62565985	107496806	G	I61 Intracerebral haemorrhage	-0.00010883	0.26693	0.279119	0.09121	0.967448	0.938
Abca1	rs1541741	107497286	C	I61 Intracerebral haemorrhage	1.12e-05	0.9146	0.224545	0.6182	0.996546	1.01
Abca1	rs569345527	107497419	C	I61 Intracerebral haemorrhage	-5.39e-05	0.93877	0.00413151	0.01443	0.91969	0.969
Abca1	rs10217476	107497956	A	I61 Intracerebral haemorrhage	1.43e-05	0.89058	0.224257	0.6777	0.996224	1.01
Abca1	rs10217335	107497979	G	I61 Intracerebral haemorrhage	1.61e-05	0.87731	0.224047	0.6178	0.996596	1.01
Abca1	rs792504	107497997	T	I61 Intracerebral haemorrhage	1.25e-05	0.89492	0.296473	0.2912	0.995967	1.01
Abca1	rs748949271	107498253	G	I61 Intracerebral haemorrhage	-0.00039926	0.71918	0.00159496	0.1699	0.951042	0.791
Abca1	rs792505	107498792	C	I61 Intracerebral haemorrhage	1.74e-05	0.84083	0.478844	0.5357	0.996056	1.01
Abca1	rs792506	107499174	C	I61 Intracerebral haemorrhage	1.23e-05	0.8967	0.296554	0.2839	0.995688	1.01
Abca1	rs4743754	107499327	A	I61 Intracerebral haemorrhage	1.62e-05	0.87636	0.224041	0.6006	0.99638	1.01
Abca1	rs4742920	107499430	T	I61 Intracerebral haemorrhage	1.21e-05	0.9073	0.224477	0.5942	0.995958	1.01
Abca1	rs113695268	107499546	C	I61 Intracerebral haemorrhage	0.00053548	0.13875	0.0153037	0.09249	0.951807	1.37
Abca1	rs792507	107500237	C	I61 Intracerebral haemorrhage	1.13e-05	0.90523	0.296534	0.2839	0.995016	1.01
Abca1	rs7866108	107500580	C	I61 Intracerebral haemorrhage	1.1e-05	0.91619	0.224582	0.5776	0.995262	1.01
Abca1	rs34939149	107500837	G	I61 Intracerebral haemorrhage	0.0001533	0.34536	0.0772486	0.2642	0.994819	1.09
Abca1	rs117527750	107501880	T	I61 Intracerebral haemorrhage	0.0004264	0.24819	0.01423	0.006522	genotyped	1.28
Abca1	rs12376920	107502019	C	I61 Intracerebral haemorrhage	-6.44e-05	0.71	0.0677724	1.86e-08	1	0.963
Abca1	rs806829	107502120	G	I61 Intracerebral haemorrhage	1.04e-05	0.91272	0.296489	0.2839	0.993875	1.01
Abca1	rs7020472	107502982	C	I61 Intracerebral haemorrhage	-0.00029359	0.27301	0.0274364	0.5622	0.979279	0.842
Abca1	rs140128883	107503070	C	I61 Intracerebral haemorrhage	-0.00045069	0.52438	0.00403991	0.5051	0.930912	0.768
Abca1	rs792508	107503369	A	I61 Intracerebral haemorrhage	-1.44e-05	0.86958	0.450635	0.537	0.98783	0.992
Abca1	rs79828711	107503731	A	I61 Intracerebral haemorrhage	7.62e-05	0.89924	0.00569852	0.8766	0.911811	1.05
Abca1	rs4743755	107504235	T	I61 Intracerebral haemorrhage	-1.93e-05	0.82632	0.440357	0.205	0.985921	0.989
Abca1	rs71511783	107504241	A	I61 Intracerebral haemorrhage	0.00015609	0.33523	0.0780657	0.1261	0.989389	1.1
Abca1	rs68023192	107504423	A	I61 Intracerebral haemorrhage	0.00013998	0.36845	0.0850318	0.2435	0.992598	1.09
Abca1	rs10761079	107504752	G	I61 Intracerebral haemorrhage	-4.46e-05	0.68286	0.198648	0.4354	0.993708	0.974
Abca1	rs143531580	107504757	T	I61 Intracerebral haemorrhage	-0.0001615	0.67692	0.0131331	0.3624	0.961517	0.91
Abca1	rs2417561	107504849	G	I61 Intracerebral haemorrhage	-3.56e-05	0.74316	0.200294	0.6064	0.994035	0.979
Abca1	rs13296284	107504958	T	I61 Intracerebral haemorrhage	0.00013781	0.37501	0.0850502	0.2534	0.996615	1.08
Abca1	rs4743756	107505000	C	I61 Intracerebral haemorrhage	1.63e-05	0.86945	0.2589	0.7319	genotyped	1.01
Abca1	rs7047626	107505056	A	I61 Intracerebral haemorrhage	-2.22e-05	0.79957	0.448198	0.1428	0.992534	0.987
Abca1	rs35613856	107505084	A	I61 Intracerebral haemorrhage	0.00013748	0.37606	0.0850567	0.2357	0.996872	1.08
Abca1	rs77029687	107505235	G	I61 Intracerebral haemorrhage	0.00014073	0.36529	0.0849155	0.262	0.997244	1.09
Abca1	rs7034016	107505262	G	I61 Intracerebral haemorrhage	8.86e-05	0.43904	0.173649	0.9054	0.998538	1.05
Abca1	rs10761080	107505887	A	I61 Intracerebral haemorrhage	8.86e-05	0.4392	0.173632	0.896	0.998472	1.05
Abca1	rs10761081	107506029	T	I61 Intracerebral haemorrhage	8.99e-05	0.43236	0.173735	0.9054	0.998488	1.05
Abca1	rs12684679	107506047	C	I61 Intracerebral haemorrhage	0.00014331	0.22097	0.165281	0.6022	0.989545	1.09
Abca1	rs10739905	107506122	T	I61 Intracerebral haemorrhage	-4.39e-05	0.68705	0.19866	0.4452	0.995325	0.975
Abca1	rs1331925	107506278	C	I61 Intracerebral haemorrhage	8.89e-05	0.4377	0.173655	0.9007	0.998467	1.05
Abca1	rs1331926	107506490	C	I61 Intracerebral haemorrhage	-4.27e-05	0.64088	0.339874	0.2662	0.993842	0.975
Abca1	rs186885649	107506505	C	I61 Intracerebral haemorrhage	0.00022138	0.6615	0.0079379	0.5847	0.930205	1.14
Abca1	rs117376890	107506887	A	I61 Intracerebral haemorrhage	0.00059987	0.17899	0.0105483	0.865	0.901529	1.42
Abca1	rs73663517	107507821	T	I61 Intracerebral haemorrhage	0.00012523	0.43605	0.0801455	0.7357	0.982901	1.08
Abca1	rs4743757	107507823	A	I61 Intracerebral haemorrhage	9.01e-05	0.4314	0.173728	0.9432	0.998329	1.05
Abca1	rs13288256	107508626	T	I61 Intracerebral haemorrhage	0.00014046	0.36618	0.0849429	0.2574	0.996727	1.09
Abca1	rs12552509	107508879	G	I61 Intracerebral haemorrhage	0.00012653	0.43145	0.0800992	0.8068	0.982996	1.08
Abca1	rs13289344	107508913	G	I61 Intracerebral haemorrhage	0.00014376	0.21958	0.165287	0.6022	0.989373	1.09
Abca1	rs77113574	107509012	A	I61 Intracerebral haemorrhage	0.00039265	0.14511	0.0278834	0.8707	0.954725	1.26
Abca1	rs28384430	107509188	C	I61 Intracerebral haemorrhage	0.00013651	0.3956	0.0802793	0.8708	0.982776	1.08
Abca1	rs2417562	107509317	G	I61 Intracerebral haemorrhage	-2.67e-05	0.76016	0.4482	0.1721	0.992519	0.985
Abca1	rs10820720	107509404	C	I61 Intracerebral haemorrhage	-3.46e-05	0.74979	0.200291	0.6103	0.996038	0.98
Abca1	rs111397558	107509423	T	I61 Intracerebral haemorrhage	0.00013081	0.74745	0.0115986	0.8795	0.989843	1.08
Abca1	rs2417563	107509671	G	I61 Intracerebral haemorrhage	-3.45e-05	0.70647	0.339161	0.2807	0.993204	0.98
Abca1	rs3753023	107509700	A	I61 Intracerebral haemorrhage	8.86e-05	0.4392	0.173592	0.9148	0.998395	1.05
Abca1	rs532992638	107509957	G	I61 Intracerebral haemorrhage	0.0010614	0.40567	0.00127448	0.1061	0.902691	1.86
Abca1	rs3753024	107510145	C	I61 Intracerebral haemorrhage	-3.45e-05	0.70694	0.33916	0.2824	0.993131	0.98
Abca1	rs3753025	107510441	G	I61 Intracerebral haemorrhage	0.00013885	0.38759	0.0802721	0.8525	0.982796	1.08
Abca1	rs182788056	107510459	C	I61 Intracerebral haemorrhage	-0.00024333	0.41533	0.0237053	0.5413	0.907348	0.867
Abca1	rs527549296	107510795	A	I61 Intracerebral haemorrhage	-0.0010238	0.28567	0.00221728	0.2372	0.918499	0.549
Abca1	rs7869844	107510889	C	I61 Intracerebral haemorrhage	8.68e-05	0.4488	0.17338	0.8912	0.998442	1.05
Abca1	rs13286392	107511934	G	I61 Intracerebral haemorrhage	0.00013816	0.37389	0.0850613	0.2313	0.996038	1.08
Abca1	rs117323391	107511975	T	I61 Intracerebral haemorrhage	-0.00024796	0.32689	0.0313791	0.8455	0.96459	0.865
Abca1	rs117754793	107512430	T	I61 Intracerebral haemorrhage	0.00040562	0.32652	0.0114675	0.5951	0.964851	1.27
Abca1	rs1858555	107512431	A	I61 Intracerebral haemorrhage	-3.54e-05	0.69918	0.339005	0.2755	0.992837	0.979
Abca1	rs10512333	107512604	C	I61 Intracerebral haemorrhage	-2.55e-05	0.81065	0.212103	0.931	0.996613	0.985
Abca1	rs2417564	107512888	C	I61 Intracerebral haemorrhage	-3.57e-05	0.74212	0.200491	0.592	0.996862	0.979
Abca1	Affx-80237266	107513267	C	I61 Intracerebral haemorrhage	0.0015194	0.56815	0.0002654	1	genotyped	2.44
Abca1	Affx-80237268	107513395	G	I61 Intracerebral haemorrhage	0.0017104	0.66785	0.0001184	1	genotyped	2.72
Abca1	rs142558245	107513758	A	I61 Intracerebral haemorrhage	-0.00020046	0.61694	0.0121473	0.1421	0.970995	0.889
Abca1	rs10733735	107513920	T	I61 Intracerebral haemorrhage	8.93e-05	0.43588	0.173508	0.9431	0.998866	1.05
Abca1	rs10820721	107514123	A	I61 Intracerebral haemorrhage	-2.46e-05	0.8171	0.212101	0.9553	0.997908	0.986
Abca1	rs78958529	107514798	G	I61 Intracerebral haemorrhage	0.00010494	0.76734	0.01521	0.2069	genotyped	1.06
Abca1	rs2274870	107515214	A	I61 Intracerebral haemorrhage	8.52e-05	0.34193	0.372342	0.9042	0.999194	1.05
Abca1	Affx-80278191	107515285	CAA	I61 Intracerebral haemorrhage	-0.00089853	0.66865	0.0004275	1	genotyped	0.591
Abca1	rs4743758	107515814	T	I61 Intracerebral haemorrhage	-1.45e-05	0.86805	0.461295	0.4597	0.993738	0.992
Abca1	rs4742921	107516115	C	I61 Intracerebral haemorrhage	0.00022352	0.55529	0.0133348	0.5498	0.993509	1.14
Abca1	rs10761082	107516169	T	I61 Intracerebral haemorrhage	8.79e-05	0.32759	0.3723	0.5137	genotyped	1.05
Abca1	rs12351593	107516341	C	I61 Intracerebral haemorrhage	9.04e-05	0.79224	0.0167727	0.3622	0.970361	1.05
Abca1	rs28663024	107517006	C	I61 Intracerebral haemorrhage	0.00087553	0.40607	0.00171868	1	0.988568	1.67
Abca1	rs72730701	107517113	C	I61 Intracerebral haemorrhage	-0.00038037	0.50748	0.00622751	0.6696	0.916008	0.8
Abca1	rs11788520	107517232	C	I61 Intracerebral haemorrhage	-2.68e-05	0.75875	0.447981	0.1585	0.993274	0.984
Abca1	rs10820722	107517680	T	I61 Intracerebral haemorrhage	9.52e-05	0.28821	0.375125	0.7108	0.999171	1.06
Abca1	rs111849046	107518124	G	I61 Intracerebral haemorrhage	0.00022536	0.55198	0.0133291	0.5498	0.994226	1.14
Abca1	rs117530142	107518134	A	I61 Intracerebral haemorrhage	0.00039241	0.14957	0.0272512	0.58	0.953796	1.26
Abca1	rs10991370	107518918	G	I61 Intracerebral haemorrhage	9.58e-05	0.28522	0.375357	0.7299	0.998322	1.06
Abca1	rs10124782	107519073	C	I61 Intracerebral haemorrhage	0.00088963	0.39837	0.0017193	1	0.989921	1.68
Abca1	rs7853255	107519327	T	I61 Intracerebral haemorrhage	0.00013016	0.41886	0.0800204	0.9443	0.9818	1.08
Abca1	rs10820723	107519449	G	I61 Intracerebral haemorrhage	-6.36e-05	0.5574	0.20139	0.31	0.99821	0.963
Abca1	rs4743759	107520006	G	I61 Intracerebral haemorrhage	0.0002255	0.55151	0.0133363	0.5077	0.994623	1.14
Abca1	rs79621459	107520355	T	I61 Intracerebral haemorrhage	0.00013076	0.41681	0.0800017	0.9257	0.981781	1.08
Abca1	rs4742922	107520596	A	I61 Intracerebral haemorrhage	9.58e-05	0.28495	0.375267	0.7108	0.9984	1.06
Abca1	rs151261141	107520803	T	I61 Intracerebral haemorrhage	-0.00060346	0.11313	0.0144798	0.4061	0.904561	0.702
Abca1	rs28571030	107520819	G	I61 Intracerebral haemorrhage	0.00088628	0.39893	0.00172362	1	0.990642	1.68
Abca1	rs2297397	107521496	A	I61 Intracerebral haemorrhage	-6.32e-05	0.55957	0.201388	0.3	0.997833	0.964
Abca1	rs145918659	107521545	C	I61 Intracerebral haemorrhage	0.001346	0.72065	0.0001328	1	genotyped	2.2
Abca1	Affx-52371557	107521615	AAT	I61 Intracerebral haemorrhage	-0.00034468	0.60088	0.004369	0.01862	genotyped	0.817
Abca1	rs1046115	107521723	G	I61 Intracerebral haemorrhage	8.38e-05	0.46449	0.173708	0.9196	0.997889	1.05
Abca1	rs41277757	107522300	T	I61 Intracerebral haemorrhage	0.00013019	0.74812	0.0115983	0.9397	0.99419	1.08
Abca1	rs142404865	107522345	G	I61 Intracerebral haemorrhage	0.0002749	0.58558	0.00800162	0.8306	0.929569	1.17
Abca1	rs41277759	107522348	C	I61 Intracerebral haemorrhage	0.0001465	0.34439	0.0860457	0.2654	0.991234	1.09
Abca1	rs141888073	107522870	G	I61 Intracerebral haemorrhage	-9.36e-05	0.88221	0.0050739	0.6054	0.931435	0.947
Abca1	rs62565986	107523863	C	I61 Intracerebral haemorrhage	-0.00035405	0.18912	0.0274925	0.3167	0.964494	0.813
Abca1	rs10820724	107524390	T	I61 Intracerebral haemorrhage	5.29e-05	0.54467	0.455499	0.5768	0.992197	1.03
Abca1	rs62565987	107525011	G	I61 Intracerebral haemorrhage	-5.05e-05	0.69076	0.139105	0.2154	0.966626	0.971
Abca1	rs2472479	107525165	T	I61 Intracerebral haemorrhage	9.53e-05	0.28806	0.375405	0.6971	0.997362	1.06
Abca1	rs7874756	107525799	G	I61 Intracerebral haemorrhage	0.00012153	0.44969	0.0804873	0.9815	0.97954	1.07
Abca1	rs28465543	107526127	C	I61 Intracerebral haemorrhage	-0.00023187	0.54052	0.01332	0.05454	genotyped	0.873
Abca1	rs150502356	107526539	C	I61 Intracerebral haemorrhage	0.0016477	0.3169	0.0006947	1	genotyped	2.63
Abca1	rs62565988	107526619	A	I61 Intracerebral haemorrhage	-6.2e-05	0.62743	0.137822	0.2278	0.964462	0.964
Abca1	rs10820725	107526769	T	I61 Intracerebral haemorrhage	-2.99e-05	0.78377	0.200729	0.1917	0.992277	0.983
Abca1	rs77391147	107527369	G	I61 Intracerebral haemorrhage	1.01e-05	0.97632	0.0169404	0.0678	0.969921	1.01
Abca1	rs12552611	107527830	C	I61 Intracerebral haemorrhage	0.00012712	0.42982	0.0802654	0.898	0.9791	1.08
Abca1	rs2487714	107527916	A	I61 Intracerebral haemorrhage	3.76e-05	0.66631	0.46811	0.609	0.991207	1.02
Abca1	rs145408637	107527923	A	I61 Intracerebral haemorrhage	-0.00072448	0.4652	0.00208375	0.3835	0.906512	0.654
Abca1	rs72732604	107529025	T	I61 Intracerebral haemorrhage	-0.00019555	0.71417	0.00716039	0.9049	0.925182	0.892
Abca1	rs1559711	107529048	C	I61 Intracerebral haemorrhage	0.00088711	0.3963	0.00174988	1	0.991619	1.68
Abca1	rs35350211	107529105	C	I61 Intracerebral haemorrhage	0.00013992	0.35577	0.0905794	0.453	0.989351	1.09
Abca1	rs2482426	107529411	T	I61 Intracerebral haemorrhage	-8.82e-06	0.91979	0.441187	0.5882	0.98947	0.995
Abca1	rs2162116	107529413	T	I61 Intracerebral haemorrhage	0.00053964	0.61406	0.00169084	1	0.987099	1.37
Abca1	rs10991376	107529689	C	I61 Intracerebral haemorrhage	-3.6e-05	0.73863	0.203849	0.1902	0.999121	0.979
Abca1	rs190154301	107529970	G	I61 Intracerebral haemorrhage	0.00022746	0.58993	0.0117904	0.2789	0.902429	1.14
Abca1	rs4743760	107530409	C	I61 Intracerebral haemorrhage	0.00014732	0.32611	0.0936497	0.9757	0.981254	1.09
Abca1	rs10761083	107531005	C	I61 Intracerebral haemorrhage	-4.37e-05	0.68475	0.203982	0.1852	0.999735	0.975
Abca1	rs12351524	107531127	T	I61 Intracerebral haemorrhage	0.00014828	0.32328	0.0934627	0.9838	0.981575	1.09
Abca1	rs10761084	107531152	G	I61 Intracerebral haemorrhage	3.91e-05	0.71724	0.2036	0.01338	genotyped	1.02
Abca1	rs2472478	107531361	C	I61 Intracerebral haemorrhage	0.00010328	0.24999	0.373775	0.2646	0.996567	1.06
Abca1	rs2472477	107531658	T	I61 Intracerebral haemorrhage	0.00010355	0.24881	0.373896	0.2693	0.996219	1.06
Abca1	rs2472476	107531956	T	I61 Intracerebral haemorrhage	9.58e-05	0.28587	0.374189	0.2695	0.996436	1.06
Abca1	rs10820726	107532317	G	I61 Intracerebral haemorrhage	-4.24e-05	0.69368	0.2042	0.2052	0.999329	0.975
Abca1	rs2487715	107532394	G	I61 Intracerebral haemorrhage	9.04e-05	0.31378	0.374216	0.2695	0.997133	1.05
Abca1	rs2482427	107532425	G	I61 Intracerebral haemorrhage	9.11e-05	0.31001	0.374325	0.2743	0.996442	1.05
Abca1	rs2472475	107532641	C	I61 Intracerebral haemorrhage	9.37e-05	0.41773	0.170563	0.5699	0.993281	1.06
Abca1	rs3739740	107533159	A	I61 Intracerebral haemorrhage	-0.00086835	0.40079	0.001766	1	genotyped	0.601
Abca1	rs3739741	107533175	C	I61 Intracerebral haemorrhage	2.07e-05	0.84801	0.2039	0.0005673	genotyped	1.01
Abca1	rs41277761	107533232	C	I61 Intracerebral haemorrhage	0.00097461	0.2402	0.002741	1	genotyped	1.77
Abca1	rs117183798	107533330	T	I61 Intracerebral haemorrhage	-2.96e-05	0.94949	0.00903338	0.8449	0.960747	0.983
Abca1	rs13439932	107533518	T	I61 Intracerebral haemorrhage	0.00088149	0.39612	0.00176331	1	0.994411	1.68
Abca1	rs2487716	107533726	A	I61 Intracerebral haemorrhage	0.00010159	0.37987	0.170064	0.5287	0.994404	1.06
Abca1	rs10120882	107533808	A	I61 Intracerebral haemorrhage	0.00090304	0.38711	0.00174627	1	0.994929	1.7
Abca1	rs10118769	107533911	C	I61 Intracerebral haemorrhage	0.00023504	0.53434	0.0134595	0.4651	0.989107	1.15
Abca1	rs112661088	107533967	A	I61 Intracerebral haemorrhage	-0.00021172	0.4712	0.0232179	0.8508	0.955587	0.883
Abca1	rs2472474	107534787	C	I61 Intracerebral haemorrhage	7.27e-05	0.41573	0.385306	0.6087	0.994557	1.04
Abca1	rs2487718	107534906	G	I61 Intracerebral haemorrhage	6.58e-05	0.55794	0.183638	0.7232	0.991684	1.04
Abca1	rs143630689	107535190	G	I61 Intracerebral haemorrhage	0.0016278	0.60152	0.0001936	1	genotyped	2.6
Abca1	rs28379689	107535492	G	I61 Intracerebral haemorrhage	1.07e-05	0.97584	0.0155731	0.5693	0.982778	1.01
Abca1	rs2482429	107535864	G	I61 Intracerebral haemorrhage	0.00011348	0.32818	0.168851	0.4839	0.994736	1.07
Abca1	rs10820730	107536022	C	I61 Intracerebral haemorrhage	6.13e-05	0.49599	0.375802	0.2019	0.987356	1.04
Abca1	rs2515606	107536895	G	I61 Intracerebral haemorrhage	-2.64e-06	0.97595	0.444081	0.5302	0.986924	0.998
Abca1	rs10117535	107537021	T	I61 Intracerebral haemorrhage	7.15e-05	0.42412	0.386856	0.6035	0.987336	1.04
Abca1	rs35805725	107537087	G	I61 Intracerebral haemorrhage	0.00013324	0.3813	0.0896802	0.4132	0.988917	1.08
Abca1	rs57365304	107537395	A	I61 Intracerebral haemorrhage	0.00014472	0.37347	0.0789126	0.8586	0.974275	1.09
Abca1	rs2472473	107537681	A	I61 Intracerebral haemorrhage	0.0001175	0.30996	0.169735	0.4861	0.996311	1.07
Abca1	rs2777796	107537715	C	I61 Intracerebral haemorrhage	-2.66e-05	0.90556	0.03888	0.8366	genotyped	0.985
Abca1	rs2472472	107538407	G	I61 Intracerebral haemorrhage	-0.00013152	0.58649	0.0334	0.07048	genotyped	0.926
Abca1	rs75510317	107538817	G	I61 Intracerebral haemorrhage	-0.00010577	0.77837	0.0137406	0.8476	0.979143	0.94
Abca1	rs78269402	107539088	C	I61 Intracerebral haemorrhage	0.0002997	0.33046	0.0211224	0.4902	0.955862	1.19
Abca1	rs2482430	107539352	C	I61 Intracerebral haemorrhage	0.00011019	0.34223	0.168759	0.4959	0.995665	1.07
Abca1	rs2515605	107540189	T	I61 Intracerebral haemorrhage	9.46e-05	0.41237	0.170554	0.5793	0.998499	1.06
Abca1	rs117175701	107540279	C	I61 Intracerebral haemorrhage	0.00047893	0.26452	0.0109541	0.6877	0.936453	1.32
Abca1	rs2482431	107540284	T	I61 Intracerebral haemorrhage	9.65e-05	0.40207	0.1713	0.5322	genotyped	1.06
Abca1	rs73663521	107540366	G	I61 Intracerebral haemorrhage	0.00012947	0.42214	0.0802714	0.9069	0.974533	1.08
Abca1	rs10739906	107540484	A	I61 Intracerebral haemorrhage	7.9e-05	0.37835	0.387094	0.5302	0.984725	1.05
Abca1	rs12338431	107540745	G	I61 Intracerebral haemorrhage	0.00074784	0.46368	0.00189704	1	0.963287	1.55
Abca1	rs10820731	107540809	G	I61 Intracerebral haemorrhage	1.75e-05	0.8565	0.286023	0.3167	0.983687	1.01
Abca1	rs12683154	107540983	G	I61 Intracerebral haemorrhage	0.00012279	0.44581	0.0806153	0.8156	0.973323	1.07
Abca1	rs75863514	107541117	A	I61 Intracerebral haemorrhage	0.00032906	0.28906	0.0207608	0.3819	0.956582	1.21
Abca1	rs10124469	107541242	T	I61 Intracerebral haemorrhage	0.00079668	0.43994	0.00185517	1	0.963511	1.6
Abca1	rs28408753	107541618	G	I61 Intracerebral haemorrhage	0.00084383	0.41846	0.00183385	1	0.959971	1.64
Abca1	rs10761085	107542068	T	I61 Intracerebral haemorrhage	2.16e-05	0.82382	0.282559	0.3199	0.982601	1.01
Abca1	rs2482432	107543172	C	I61 Intracerebral haemorrhage	-1.56e-05	0.85907	0.444253	0.5785	0.980191	0.991
Abca1	rs10991377	107543376	C	I61 Intracerebral haemorrhage	8.44e-05	0.70903	0.0412839	0.0228	0.927353	1.05
Abca1	rs4149341	107544285	C	I61 Intracerebral haemorrhage	-3.56e-05	0.7429	0.203309	0.1542	0.984705	0.979
Abca1	rs41437944	107544673	G	I61 Intracerebral haemorrhage	0.00012926	0.75188	0.0116173	1	0.975672	1.08
Abca1	rs4149340	107544685	A	I61 Intracerebral haemorrhage	0.00080224	0.4368	0.00186345	1	0.962769	1.6
Abca1	rs363717	107544700	T	I61 Intracerebral haemorrhage	0.0001004	0.38662	0.169978	0.6989	0.991285	1.06
Abca1	rs4149339	107545156	A	I61 Intracerebral haemorrhage	4.94e-06	0.95958	0.282525	0.1527	0.977964	1
Abca1	rs4149338	107545903	A	I61 Intracerebral haemorrhage	1.87e-05	0.84676	0.292588	0.4591	0.97358	1.01
Abca1	rs2482433	107546901	A	I61 Intracerebral haemorrhage	4.7e-05	0.629	0.2762	0.8607	genotyped	1.03
Abca1	rs2472470	107547024	A	I61 Intracerebral haemorrhage	-0.00010582	0.34822	0.200138	0.5995	0.916324	0.94
Abca1	rs11789818	107547230	T	I61 Intracerebral haemorrhage	0.00013702	0.1993	0.236903	0.1175	0.908272	1.08
Abca1	rs76237581	107547273	C	I61 Intracerebral haemorrhage	-0.00013133	0.73804	0.01249	3.08e-14	genotyped	0.926
Abca1	rs139692954	107547471	T	I61 Intracerebral haemorrhage	0.00036475	0.5461	0.00564719	1	0.912467	1.24
Abca1	rs1331924	107547622	G	I61 Intracerebral haemorrhage	-1.14e-05	0.92942	0.139028	0.579	0.943849	0.993
Abca1	Affx-89012325	107547734	C	I61 Intracerebral haemorrhage	0.0017007	0.58428	0.0001948	1	genotyped	2.71
Abca1	rs62566031	107548250	A	I61 Intracerebral haemorrhage	-4.27e-05	0.77154	0.0983191	0.2137	0.978075	0.975
Abca1	rs2777797	107548375	A	I61 Intracerebral haemorrhage	4.61e-06	0.97489	0.102053	0.9156	0.950174	1
Abca1	rs2066882	107548462	C	I61 Intracerebral haemorrhage	0.00031586	0.052335	0.0791425	0.8404	0.969004	1.2
Abca1	rs2740485	107548493	T	I61 Intracerebral haemorrhage	-2.58e-08	0.99986	0.102088	0.8933	0.954444	1
Abca1	rs2066881	107548566	C	I61 Intracerebral haemorrhage	0.00030484	0.091656	0.0619239	0.3849	0.98976	1.2
Abca1	rs4149337	107548818	A	I61 Intracerebral haemorrhage	-0.00033454	0.07162	0.05891	0.8048	genotyped	0.822
Abca1	rs73517878	107549291	A	I61 Intracerebral haemorrhage	-3.73e-05	0.90963	0.0187779	0.1373	0.931326	0.978
Abca1	rs2274871	107549593	G	I61 Intracerebral haemorrhage	0.00031873	0.08705	0.0581295	0.4567	0.985517	1.21
Abca1	rs62566032	107549827	G	I61 Intracerebral haemorrhage	5.22e-05	0.72072	0.09767	0.5482	genotyped	1.03
Abca1	rs9282537	107550222	A	I61 Intracerebral haemorrhage	0.00012238	0.72125	0.0172185	0.3169	0.930032	1.07
Abca1	rs80237807	107550624	C	I61 Intracerebral haemorrhage	-0.00063217	0.15995	0.00968481	0.2328	0.965777	0.69
Abca1	rs4149336	107550639	G	I61 Intracerebral haemorrhage	0.00015166	0.18389	0.180715	1	0.971815	1.09
Abca1	rs2740484	107551180	T	I61 Intracerebral haemorrhage	-0.00016746	0.072049	0.35375	0.7641	0.946751	0.907
Abca1	rs2297405	107551247	C	I61 Intracerebral haemorrhage	0.00029643	0.10077	0.0624427	0.426	0.980089	1.19
Abca1	rs10116972	107551529	T	I61 Intracerebral haemorrhage	0.00034253	0.25072	0.0222013	0.6578	0.964716	1.22
Abca1	rs2297406	107551538	C	I61 Intracerebral haemorrhage	-5.18e-05	0.58113	0.3119	0.01654	genotyped	0.97
Abca1	rs4149335	107551726	A	I61 Intracerebral haemorrhage	0.00030023	0.036166	0.103234	0.525	0.983067	1.19
Abca1	rs115963220	107552061	C	I61 Intracerebral haemorrhage	1.05e-05	0.98536	0.00596613	0.3521	0.946039	1.01
Abca1	rs192886840	107552211	T	I61 Intracerebral haemorrhage	0.00059371	0.045538	0.0225754	0.6145	0.963428	1.42
Abca1	rs12003698	107552620	C	I61 Intracerebral haemorrhage	0.00038398	0.20428	0.0214857	0.6186	0.971419	1.25
Abca1	rs4149334	107552695	A	I61 Intracerebral haemorrhage	0.00032036	0.0161	0.121327	0.0925	0.991434	1.21
Abca1	rs4149333	107552924	G	I61 Intracerebral haemorrhage	0.00032107	0.015849	0.121322	0.09249	0.991827	1.21
Abca1	rs4149332	107552939	G	I61 Intracerebral haemorrhage	0.00032107	0.01585	0.121328	0.09249	0.991793	1.21
Abca1	rs2020927	107553185	G	I61 Intracerebral haemorrhage	0.00031572	0.015627	0.126923	0.1664	0.990964	1.2
Abca1	rs4149331	107553478	T	I61 Intracerebral haemorrhage	0.00031576	0.015608	0.126908	0.1617	0.991128	1.2
Abca1	rs10121901	107553524	G	I61 Intracerebral haemorrhage	0.00031478	0.015919	0.126958	0.1528	0.991083	1.2
Abca1	rs10124686	107553621	A	I61 Intracerebral haemorrhage	0.00052225	0.14093	0.0155275	0.9102	0.970412	1.36
Abca1	rs2066720	107554069	T	I61 Intracerebral haemorrhage	0.00032814	0.012046	0.126752	0.1758	0.990757	1.21
Abca1	rs142688906	107554263	C	I61 Intracerebral haemorrhage	0.00148	0.37364	0.0006766	0.1007	genotyped	2.38
Abca1	rs2297407	107554521	C	I61 Intracerebral haemorrhage	0.00032544	0.012681	0.126895	0.1527	0.991642	1.21
Abca1	rs2150867	107554534	C	I61 Intracerebral haemorrhage	-0.0001826	0.074952	0.23594	0.9848	0.989937	0.899
Abca1	rs4149330	107554744	G	I61 Intracerebral haemorrhage	0.00028479	0.074273	0.080671	0.4171	0.991185	1.18
Abca1	rs4149329	107554745	T	I61 Intracerebral haemorrhage	0.00032604	0.012521	0.126853	0.1549	0.991856	1.21
Abca1	rs4149328	107554828	G	I61 Intracerebral haemorrhage	0.0003359	0.23769	0.0239693	0.3621	0.982651	1.22
Abca1	rs2297408	107555306	A	I61 Intracerebral haemorrhage	0.00028828	0.31639	0.0234074	0.4335	0.983485	1.18
Abca1	rs4149327	107555711	C	I61 Intracerebral haemorrhage	-0.00027943	0.04757	0.1056	0.2092	genotyped	0.849
Abca1	rs4149326	107556349	C	I61 Intracerebral haemorrhage	0.00028963	0.20014	0.0387294	1	0.979865	1.19
Abca1	rs2740482	107556416	A	I61 Intracerebral haemorrhage	-0.0001509	0.15147	0.218343	0.96	0.992594	0.915
Abca1	rs2740481	107556417	A	I61 Intracerebral haemorrhage	-0.00015088	0.15152	0.218345	0.96	0.992586	0.915
Abca1	rs76996768	107557177	C	I61 Intracerebral haemorrhage	0.00028178	0.07654	0.081034	0.1981	0.992911	1.18
Abca1	rs13292026	107557315	A	I61 Intracerebral haemorrhage	-0.00031843	0.23086	0.0284289	0.5873	0.956214	0.83
Abca1	rs10115901	107557574	A	I61 Intracerebral haemorrhage	0.00052927	0.13549	0.0154065	0.9548	0.980772	1.36
Abca1	rs2777798	107557865	G	I61 Intracerebral haemorrhage	6.5e-05	0.65667	0.0975788	0.6883	0.994644	1.04
Abca1	rs73519810	107558766	G	I61 Intracerebral haemorrhage	0.00012974	0.81578	0.00624616	0.3072	0.978906	1.08
Abca1	rs118137700	107558921	G	I61 Intracerebral haemorrhage	0.00044372	0.28812	0.0114199	0.4422	0.948777	1.3
Abca1	rs4149325	107558983	C	I61 Intracerebral haemorrhage	-0.00025492	0.1115	0.07979	0.5569	genotyped	0.861
Abca1	rs2777799	107559059	A	I61 Intracerebral haemorrhage	4.9e-05	0.73053	0.1037	0.6896	genotyped	1.03
Abca1	rs4149324	107559479	C	I61 Intracerebral haemorrhage	0.00028479	0.074662	0.0799485	0.4693	0.999575	1.18
Abca1	rs4149323	107560291	A	I61 Intracerebral haemorrhage	0.00028209	0.077402	0.0800484	0.4489	0.997482	1.18
Abca1	rs75866150	107560454	C	I61 Intracerebral haemorrhage	0.00014083	0.80099	0.00621483	0.3733	0.977385	1.09
Abca1	rs60690601	107560647	G	I61 Intracerebral haemorrhage	9.82e-05	0.859	0.00634541	0.3076	0.968672	1.06
Abca1	rs150125857	107560784	C	I61 Intracerebral haemorrhage	0.00023607	0.88437	0.0007146	1	genotyped	1.15
Abca1	rs28690796	107561452	C	I61 Intracerebral haemorrhage	0.00024119	0.46586	0.0177813	0.806	0.978535	1.15
Abca1	rs2740480	107562557	A	I61 Intracerebral haemorrhage	-0.00016637	0.10319	0.236139	0.762	0.99939	0.907
Abca1	rs2230808	107562804	C	I61 Intracerebral haemorrhage	-0.000148	0.14955	0.235	0.0005725	genotyped	0.917
Abca1	rs147147986	107563174	A	I61 Intracerebral haemorrhage	0.00027671	0.67421	0.00451404	0.5457	0.960577	1.18
Abca1	rs58902766	107563227	C	I61 Intracerebral haemorrhage	0.00028008	0.079492	0.0801161	0.449	0.996416	1.18
Abca1	rs2777800	107563269	C	I61 Intracerebral haemorrhage	-0.00010153	0.36451	0.18403	0.8109	0.995868	0.942
Abca1	rs2740479	107563437	A	I61 Intracerebral haemorrhage	-0.00014781	0.11232	0.322612	0.5006	0.992232	0.917
Abca1	rs60707048	107563593	T	I61 Intracerebral haemorrhage	0.00029323	0.066309	0.0801939	0.4563	0.996331	1.19
Abca1	rs2245793	107563603	C	I61 Intracerebral haemorrhage	7.03e-05	0.6305	0.0977105	0.6883	0.994157	1.04
Abca1	rs2740478	107563687	A	I61 Intracerebral haemorrhage	-0.00018717	0.040106	0.363734	0.7082	0.975252	0.896
Abca1	rs12004453	107563752	T	I61 Intracerebral haemorrhage	0.000367	0.27287	0.0176359	0.6103	0.965222	1.24
Abca1	rs60065600	107563880	T	I61 Intracerebral haemorrhage	0.00029411	0.065546	0.0801783	0.4494	0.996191	1.19
Abca1	rs60401607	107564014	A	I61 Intracerebral haemorrhage	0.00029432	0.065364	0.0801764	0.4494	0.996087	1.19
Abca1	rs2740477	107564077	A	I61 Intracerebral haemorrhage	-0.00015334	0.14495	0.217528	0.912	0.995769	0.914
Abca1	rs2297404	107564466	G	I61 Intracerebral haemorrhage	0.00029247	0.066965	0.0802793	0.4429	0.995508	1.19
Abca1	rs1999431	107564676	C	I61 Intracerebral haemorrhage	0.00031296	0.16783	0.0383318	0.7096	0.982501	1.2
Abca1	rs914545	107564741	G	I61 Intracerebral haemorrhage	0.0001302	0.36513	0.101816	0.9322	0.992124	1.08
Abca1	rs914546	107564839	T	I61 Intracerebral haemorrhage	0.00034949	0.1536	0.0326657	0.5904	0.983287	1.23
Abca1	rs1883023	107564846	C	I61 Intracerebral haemorrhage	-0.00014902	0.14372	0.238215	0.8065	0.996355	0.916
Abca1	rs4149321	107564939	A	I61 Intracerebral haemorrhage	0.00029343	0.066163	0.0802729	0.4293	0.994704	1.19
Abca1	rs78689349	107565919	A	I61 Intracerebral haemorrhage	0.00029284	0.066675	0.0803665	0.4628	0.993736	1.19
Abca1	rs3780538	107565993	G	I61 Intracerebral haemorrhage	0.0002966	0.06274	0.0807178	0.4304	0.993233	1.19
Abca1	rs12351534	107566049	T	I61 Intracerebral haemorrhage	0.00049754	0.15821	0.0156091	0.7793	0.978892	1.34
Abca1	rs141152881	107566300	C	I61 Intracerebral haemorrhage	0.00012238	0.83585	0.00554499	0.6194	0.966403	1.07
Abca1	rs137990495	107566763	C	I61 Intracerebral haemorrhage	-0.00050406	0.60669	0.00213713	0.1777	0.903308	0.744
Abca1	rs2777801	107566877	A	I61 Intracerebral haemorrhage	0.00011581	0.40741	0.108374	0.6604	0.992463	1.07
Abca1	rs41277763	107566930	C	I61 Intracerebral haemorrhage	0.00032383	0.26131	0.0231	0.07412	genotyped	1.21
Abca1	rs12340337	107567482	G	I61 Intracerebral haemorrhage	0.00055075	0.13629	0.0145208	0.6241	0.956327	1.38
Abca1	rs191036283	107567802	G	I61 Intracerebral haemorrhage	-0.00036223	0.37481	0.0117487	1	0.96981	0.809
Abca1	rs12344798	107568207	A	I61 Intracerebral haemorrhage	0.00015263	0.63283	0.0191039	0.9262	0.975945	1.09
Abca1	rs2066716	107568705	T	I61 Intracerebral haemorrhage	3.88e-05	0.8058	0.0829118	0.0973	0.987762	1.02
Abca1	rs79617159	107568936	G	I61 Intracerebral haemorrhage	0.00017953	0.75998	0.00575645	0.6193	0.943418	1.11
Abca1	rs2777802	107569337	C	I61 Intracerebral haemorrhage	-0.00014622	0.1577	0.228671	0.4849	0.99366	0.918
Abca1	rs117736319	107569591	A	I61 Intracerebral haemorrhage	-0.00034968	0.38407	0.0119863	0.8321	0.982166	0.815
Abca1	rs61548263	107570241	C	I61 Intracerebral haemorrhage	0.00011544	0.71519	0.019396	0.8219	0.978465	1.07
Abca1	rs2740476	107570714	G	I61 Intracerebral haemorrhage	0.00019449	0.068089	0.210708	0.9139	0.992195	1.12
Abca1	rs2777803	107571208	A	I61 Intracerebral haemorrhage	0.00014331	0.32265	0.100052	0.8931	0.992112	1.09
Abca1	rs2777804	107571241	T	I61 Intracerebral haemorrhage	-0.00012833	0.17065	0.3138	0.08904	genotyped	0.928
Abca1	rs2777805	107571375	A	I61 Intracerebral haemorrhage	-0.00014283	0.16686	0.229162	0.591	0.995443	0.92
Abca1	rs113132415	107572024	A	I61 Intracerebral haemorrhage	0.00014396	0.65098	0.0191209	0.9638	0.982103	1.09
Abca1	rs2777806	107572119	G	I61 Intracerebral haemorrhage	-9.13e-05	0.56899	0.0798736	0.4385	0.992113	0.948
Abca1	rs116888079	107573458	G	I61 Intracerebral haemorrhage	-0.00034912	0.38272	0.0120529	0.8881	0.985893	0.815
Abca1	rs4149319	107573757	A	I61 Intracerebral haemorrhage	0.00057761	0.052785	0.0217764	0.747	0.984735	1.4
Abca1	rs141810477	107575839	T	I61 Intracerebral haemorrhage	-0.00087841	0.21047	0.00419848	0.01352	0.908345	0.598
Abca1	rs2297409	107576246	G	I61 Intracerebral haemorrhage	-0.00015347	0.16207	0.1939	0.2042	genotyped	0.914
Abca1	rs111337110	107576665	G	I61 Intracerebral haemorrhage	0.00017316	0.76869	0.00571701	0.5144	0.941625	1.11
Abca1	rs58694166	107577200	C	I61 Intracerebral haemorrhage	0.00013405	0.82149	0.00545995	0.6178	0.96811	1.08
Abca1	rs144810775	107577774	A	I61 Intracerebral haemorrhage	0.00051808	0.38083	0.00558655	0.6347	0.964265	1.35
Abca1	rs3780540	107578048	G	I61 Intracerebral haemorrhage	0.00048377	0.086027	0.0248329	0.9715	0.971429	1.33
Abca1	rs71511786	107578059	T	I61 Intracerebral haemorrhage	-8.11e-05	0.61417	0.0794811	0.2897	0.989553	0.954
Abca1	rs3780541	107578103	C	I61 Intracerebral haemorrhage	0.00032199	0.043919	0.0806448	0.3149	0.989422	1.21
Abca1	rs2234885	107578401	C	I61 Intracerebral haemorrhage	-0.00024325	0.45395	0.01831	3.88e-07	genotyped	0.867
Abca1	rs34788556	107578529	C	I61 Intracerebral haemorrhage	0.00016562	0.76954	0.00617926	0.4479	0.95855	1.1
Abca1	rs143180998	107578618	C	I61 Intracerebral haemorrhage	0.00080343	0.51574	0.001234	1	genotyped	1.6
Abca1	rs76881554	107578620	G	I61 Intracerebral haemorrhage	-7.06e-05	0.94366	0.001888	0.6489	genotyped	0.959
Abca1	rs55858182	107578675	T	I61 Intracerebral haemorrhage	0.00035658	0.45854	0.00889837	0.9182	0.91469	1.23
Abca1	rs111975414	107579252	G	I61 Intracerebral haemorrhage	2.22e-05	0.96873	0.00601472	0.4483	0.966022	1.01
Abca1	rs2297401	107579472	A	I61 Intracerebral haemorrhage	-0.0003308	0.10738	0.04685	0.4368	genotyped	0.824
Abca1	rs33918808	107579632	C	I61 Intracerebral haemorrhage	-0.00045587	0.072155	0.03012	0.4818	genotyped	0.766
Abca1	rs13292447	107579750	T	I61 Intracerebral haemorrhage	-0.00048981	0.075409	0.027786	0.4881	0.908584	0.75
Abca1	rs28652716	107579818	C	I61 Intracerebral haemorrhage	0.00014021	0.66152	0.0198022	0.4494	0.938235	1.09
Abca1	rs2297402	107579880	T	I61 Intracerebral haemorrhage	8.59e-05	0.77174	0.0236653	0.1784	0.915291	1.05
Abca1	rs9299383	107580210	C	I61 Intracerebral haemorrhage	0.00026291	0.43569	0.0178963	0.3869	0.93414	1.17
Abca1	rs58866705	107580480	C	I61 Intracerebral haemorrhage	-0.00060577	0.091108	0.01487	0.3541	genotyped	0.701
Abca1	rs3818688	107580657	A	I61 Intracerebral haemorrhage	0.0001676	0.3354	0.0720914	0.1546	0.91666	1.1
Abca1	rs12338782	107580659	C	I61 Intracerebral haemorrhage	-9.4e-05	0.57356	0.07285	0.1665	genotyped	0.946
Abca1	rs2020926	107580842	C	I61 Intracerebral haemorrhage	0.00020992	0.22846	0.0720185	0.07677	0.913705	1.13
Abca1	rs56246085	107582675	T	I61 Intracerebral haemorrhage	0.00069672	0.13939	0.00886876	0.03238	0.956836	1.5
Abca1	rs3780542	107582780	A	I61 Intracerebral haemorrhage	0.00030405	0.099719	0.0603141	0.3089	0.967093	1.2
Abca1	rs115139126	107582787	G	I61 Intracerebral haemorrhage	-0.00076561	0.22303	0.00494979	0.5966	0.957863	0.638
Abca1	rs55993392	107582998	G	I61 Intracerebral haemorrhage	0.00020816	0.1551	0.100697	0.2735	0.964514	1.13
Abca1	Affx-80237285	107583713	A	I61 Intracerebral haemorrhage	0.0016989	0.5458	0.0002378	1	genotyped	2.71
Abca1	rs182567285	107584263	A	I61 Intracerebral haemorrhage	0.00081656	0.13635	0.00650347	0.3259	0.963589	1.61
Abca1	rs4149315	107584309	C	I61 Intracerebral haemorrhage	0.00039077	0.039258	0.0557065	0.2449	0.992992	1.26
Abca1	rs4149314	107584351	C	I61 Intracerebral haemorrhage	0.0001795	0.2072	0.104922	0.2627	0.985522	1.11
Abca1	rs3818689	107585016	C	I61 Intracerebral haemorrhage	-8.93e-05	0.60931	0.0661185	0.847	0.996872	0.949
Abca1	rs112853430	107585213	C	I61 Intracerebral haemorrhage	-0.00016415	0.46757	0.03834	0.9626	genotyped	0.908
Abca1	rs7025776	107585316	G	I61 Intracerebral haemorrhage	0.00029782	0.098964	0.0616804	0.2449	0.992818	1.19
Abca1	rs75003539	107585841	A	I61 Intracerebral haemorrhage	0.00039481	0.037196	0.0556263	0.2445	0.994852	1.26
Abca1	rs35093463	107586238	A	I61 Intracerebral haemorrhage	-0.00018787	0.29338	0.0628061	0.6547	0.997784	0.896
Abca1	rs56104133	107586671	T	I61 Intracerebral haemorrhage	0.00063467	0.17164	0.0092835	0.2554	0.946013	1.45
Abca1	rs2066714	107586753	T	I61 Intracerebral haemorrhage	-9.6e-05	0.45998	0.1277	0.6392	genotyped	0.945
Abca1	rs13291863	107587325	G	I61 Intracerebral haemorrhage	1.85e-05	0.91848	0.06157	0.9883	genotyped	1.01
Abca1	rs2066715	107588033	C	I61 Intracerebral haemorrhage	0.00018111	0.31098	0.06285	0.8287	genotyped	1.11
Abca1	rs3824477	107588328	A	I61 Intracerebral haemorrhage	6.08e-05	0.81507	0.0285704	0.5939	0.998763	1.04
Abca1	rs3780543	107588572	G	I61 Intracerebral haemorrhage	8.59e-05	0.51885	0.120216	0.2642	0.999691	1.05
Abca1	rs4149311	107588777	C	I61 Intracerebral haemorrhage	-9.28e-05	0.48816	0.1195	0.313	genotyped	0.947
Abca1	rs4149310	107589134	A	I61 Intracerebral haemorrhage	-0.00010018	0.40175	0.1558	0.1401	genotyped	0.943
Abca1	rs138880920	107589238	G	I61 Intracerebral haemorrhage	0.00096613	0.36096	0.0018241	0.616	0.915109	1.76
Abca1	rs35819696	107589246	T	I61 Intracerebral haemorrhage	-4.82e-05	0.94168	0.004357	0.04785	genotyped	0.972
Abca1	rs2066718	107589255	C	I61 Intracerebral haemorrhage	-3.64e-05	0.88892	0.02847	0.7527	genotyped	0.979
Abca1	rs7024300	107589567	T	I61 Intracerebral haemorrhage	6.06e-05	0.81581	0.0285687	0.5937	0.998576	1.04
Abca1	rs4149309	107589580	T	I61 Intracerebral haemorrhage	8.88e-05	0.50544	0.119933	0.221	0.999695	1.05
Abca1	rs4149308	107589630	T	I61 Intracerebral haemorrhage	8.86e-05	0.50625	0.119935	0.2241	0.999692	1.05
Abca1	rs4149307	107589744	T	I61 Intracerebral haemorrhage	5.37e-05	0.65465	0.153536	0.09224	0.998794	1.03
Abca1	rs10991383	107589795	G	I61 Intracerebral haemorrhage	0.00039244	0.038212	0.0556935	0.2321	0.995547	1.26
Abca1	rs4149306	107589815	T	I61 Intracerebral haemorrhage	-0.00082006	0.18222	0.00508841	0.4905	0.980358	0.618
Abca1	rs10820736	107589947	C	I61 Intracerebral haemorrhage	0.00039582	0.036694	0.0556083	0.2444	0.995671	1.26
Abca1	rs78794757	107590446	T	I61 Intracerebral haemorrhage	0.00039489	0.037129	0.0556361	0.2445	0.995394	1.26
Abca1	rs142709915	107590665	A	I61 Intracerebral haemorrhage	-0.00074304	0.30596	0.00383015	0.07186	0.933149	0.647
Abca1	rs147342628	107590883	C	I61 Intracerebral haemorrhage	0.00060459	0.18893	0.0090615	0.08931	0.983349	1.43
Abca1	rs13306069	107591024	T	I61 Intracerebral haemorrhage	-0.00020161	0.25901	0.0628452	0.6339	0.999534	0.889
Abca1	rs10820737	107591082	T	I61 Intracerebral haemorrhage	0.00039525	0.036959	0.0556132	0.238	0.995633	1.26
Abca1	rs10820738	107591116	C	I61 Intracerebral haemorrhage	0.00039222	0.038309	0.0556992	0.2258	0.995586	1.26
Abca1	rs2853579	107591272	G	I61 Intracerebral haemorrhage	-4.88e-05	0.71494	0.1198	0.5643	genotyped	0.972
Abca1	rs2066717	107591478	G	I61 Intracerebral haemorrhage	0.00018359	0.30453	0.06287	0.8174	genotyped	1.11
Abca1	rs77120011	107591807	T	I61 Intracerebral haemorrhage	0.00039222	0.038323	0.0556982	0.2258	0.995436	1.26
Abca1	rs139575234	107592109	T	I61 Intracerebral haemorrhage	-0.00079257	0.27127	0.00392831	0.8249	0.921341	0.628
Abca1	rs4743762	107592189	A	I61 Intracerebral haemorrhage	7.58e-05	0.56955	0.120211	0.2782	0.999176	1.05
Abca1	rs78548599	107592356	C	I61 Intracerebral haemorrhage	0.00016941	0.36347	0.05766	0.002062	genotyped	1.1
Abca1	rs72607108	107592641	G	I61 Intracerebral haemorrhage	0.00018454	0.20203	0.100375	0.2372	0.992617	1.11
Abca1	rs140636454	107592708	T	I61 Intracerebral haemorrhage	0.00070195	0.061445	0.0146869	0.06144	0.914346	1.51
Abca1	rs2482416	107592976	T	I61 Intracerebral haemorrhage	-4.3e-05	0.94866	0.00453452	0.01622	0.916483	0.975
Abca1	rs4743763	107593182	T	I61 Intracerebral haemorrhage	0.00016785	0.087383	0.266076	0.05435	0.995139	1.1
Abca1	rs150237889	107593620	C	I61 Intracerebral haemorrhage	0.00018744	0.1949	0.100372	0.2566	0.993464	1.12
Abca1	rs2515629	107594364	A	I61 Intracerebral haemorrhage	-0.00013334	0.24441	0.1734	0.981	genotyped	0.925
Abca1	rs4149304	107594474	C	I61 Intracerebral haemorrhage	0.00039383	0.037684	0.0556812	0.2254	0.994013	1.26
Abca1	rs4149303	107594515	G	I61 Intracerebral haemorrhage	0.00012263	0.35441	0.122311	0.389	0.994391	1.07
Abca1	rs77437185	107594698	A	I61 Intracerebral haemorrhage	0.0001719	0.44823	0.0381468	0.3699	0.993298	1.11
Abca1	rs13306066	107595210	A	I61 Intracerebral haemorrhage	0.00014012	0.53645	0.0381869	0.45	0.992366	1.09
Abca1	rs7873387	107595602	C	I61 Intracerebral haemorrhage	7.13e-05	0.59377	0.119877	0.2586	0.992474	1.04
Abca1	rs79153526	107595684	G	I61 Intracerebral haemorrhage	0.00039116	0.039116	0.0557051	0.2316	0.99221	1.26
Abca1	rs12351480	107595978	A	I61 Intracerebral haemorrhage	2.94e-05	0.8231	0.124781	0.2512	0.991304	1.02
Abca1	rs7019569	107596101	C	I61 Intracerebral haemorrhage	-0.0002061	0.24467	0.0644602	0.4427	0.987132	0.886
Abca1	rs150768275	107596124	A	I61 Intracerebral haemorrhage	0.00010947	0.86373	0.00479555	0.4715	0.964313	1.07
Abca1	rs4149302	107596205	A	I61 Intracerebral haemorrhage	-0.00024005	0.15972	0.0706605	0.4753	0.974509	0.869
Abca1	rs4149301	107596285	C	I61 Intracerebral haemorrhage	-0.00021934	0.19733	0.0711124	0.4225	0.975574	0.879
Abca1	rs4149300	107596411	G	I61 Intracerebral haemorrhage	0.00016089	0.19305	0.145539	0.1593	0.986555	1.1
Abca1	rs2472390	107596602	C	I61 Intracerebral haemorrhage	3.42e-05	0.81154	0.103362	0.2688	0.980152	1.02
Abca1	rs77776122	107596728	T	I61 Intracerebral haemorrhage	-0.00081509	0.18863	0.00501022	0.8604	0.977347	0.62
Abca1	rs2472389	107596743	C	I61 Intracerebral haemorrhage	3.5e-05	0.80725	0.103285	0.2451	0.980645	1.02
Abca1	rs7034361	107596854	A	I61 Intracerebral haemorrhage	-0.00017527	0.3226	0.0651526	0.5679	0.975336	0.902
Abca1	rs115040046	107596931	C	I61 Intracerebral haemorrhage	-0.00081257	0.19074	0.00499531	0.86	0.976341	0.621
Abca1	rs2472388	107597504	A	I61 Intracerebral haemorrhage	3.78e-05	0.79305	0.102212	0.2796	0.985362	1.02
Abca1	rs2482418	107597722	G	I61 Intracerebral haemorrhage	0.00013564	0.14031	0.335592	0.0382	0.991904	1.08
Abca1	rs79325047	107598399	T	I61 Intracerebral haemorrhage	-0.00083783	0.17372	0.00507542	0.7313	0.978291	0.612
Abca1	rs115905886	107598619	A	I61 Intracerebral haemorrhage	-0.00082501	0.18172	0.00503788	0.861	0.979184	0.617
Abca1	rs2065412	107598740	T	I61 Intracerebral haemorrhage	0.00011472	0.19276	0.4185	0.07956	genotyped	1.07
Abca1	rs2297398	107598884	G	I61 Intracerebral haemorrhage	0.00037982	0.045481	0.055805	0.2072	0.987184	1.25
Abca1	rs2297399	107599390	G	I61 Intracerebral haemorrhage	0.00010774	0.53902	0.06554	0.7707	genotyped	1.07
Abca1	rs2297400	107599481	C	I61 Intracerebral haemorrhage	8.36e-05	0.52109	0.127572	0.3753	0.990147	1.05
Abca1	rs2515602	107600168	G	I61 Intracerebral haemorrhage	0.00012565	0.17204	0.336183	0.02466	0.990074	1.08
Abca1	rs2515601	107600193	G	I61 Intracerebral haemorrhage	1.66e-05	0.90821	0.102417	0.309	0.981771	1.01
Abca1	rs4149299	107600251	C	I61 Intracerebral haemorrhage	0.00018316	0.19323	0.106177	0.1405	0.99685	1.11
Abca1	rs35545100	107600404	G	I61 Intracerebral haemorrhage	-0.00010032	0.56859	0.0651648	0.9444	0.995935	0.943
Abca1	rs2472387	107600815	A	I61 Intracerebral haemorrhage	1.78e-05	0.90149	0.102382	0.3132	0.981652	1.01
Abca1	rs4742924	107601276	G	I61 Intracerebral haemorrhage	-0.00012067	0.48915	0.0665914	0.8049	0.988891	0.932
Abca1	rs6479282	107601512	C	I61 Intracerebral haemorrhage	0.00014271	0.16471	0.233572	0.3086	0.990968	1.09
Abca1	rs2472386	107601541	A	I61 Intracerebral haemorrhage	0.00012152	0.18682	0.33599	0.02638	0.989315	1.07
Abca1	rs12235875	107601625	C	I61 Intracerebral haemorrhage	0.00037816	0.046811	0.0558029	0.1473	0.98366	1.25
Abca1	rs12342847	107601703	A	I61 Intracerebral haemorrhage	-0.00082197	0.18465	0.00502903	0.86	0.973657	0.618
Abca1	rs139956430	107601862	T	I61 Intracerebral haemorrhage	0.00095499	0.04345	0.00868192	0.09067	0.97064	1.75
Abca1	rs151032318	107602231	T	I61 Intracerebral haemorrhage	0.0001411	0.83244	0.00464762	0.5552	0.908115	1.09
Abca1	rs55874167	107602342	G	I61 Intracerebral haemorrhage	0.00019489	0.16652	0.106016	0.1282	0.996997	1.12
Abca1	rs2246841	107602666	T	I61 Intracerebral haemorrhage	1.67e-05	0.908	0.102358	0.3957	0.980728	1.01
Abca1	rs2274873	107602678	A	I61 Intracerebral haemorrhage	0.00019129	0.18002	0.102885	0.1183	0.998033	1.12
Abca1	rs2067484	107602813	A	I61 Intracerebral haemorrhage	8.55e-05	0.62473	0.06613	0.8795	genotyped	1.05
Abca1	rs4149298	107603043	A	I61 Intracerebral haemorrhage	0.00019268	0.17689	0.102863	0.1161	0.998123	1.12
Abca1	rs2472450	107603174	T	I61 Intracerebral haemorrhage	2.58e-05	0.85811	0.102366	0.3699	0.980443	1.02
Abca1	rs77865320	107603183	A	I61 Intracerebral haemorrhage	0.00045888	0.17105	0.0175584	0.2059	0.964006	1.31
Abca1	rs2472385	107603278	C	I61 Intracerebral haemorrhage	2.77e-05	0.84758	0.102262	0.3596	0.980626	1.02
Abca1	rs2515600	107603284	G	I61 Intracerebral haemorrhage	2.59e-05	0.85762	0.102358	0.3698	0.980313	1.02
Abca1	rs2487062	107603439	C	I61 Intracerebral haemorrhage	1.55e-05	0.91433	0.102234	0.3845	0.980147	1.01
Abca1	rs12335579	107603454	T	I61 Intracerebral haemorrhage	-0.00060129	0.33036	0.00507788	0.8603	0.971067	0.703
Abca1	rs2487065	107603963	C	I61 Intracerebral haemorrhage	1.54e-05	0.91494	0.102209	0.3841	0.980374	1.01
Abca1	rs2482419	107604042	C	I61 Intracerebral haemorrhage	1.33e-05	0.92663	0.102318	0.4269	0.979889	1.01
Abca1	rs4149297	107604104	A	I61 Intracerebral haemorrhage	-0.00018452	0.18927	0.1064	0.2741	genotyped	0.897
Abca1	rs2472449	107604197	T	I61 Intracerebral haemorrhage	9.62e-05	0.29718	0.333637	0.01725	0.988043	1.06
Abca1	rs3824478	107604385	T	I61 Intracerebral haemorrhage	0.00037336	0.049864	0.0558429	0.1165	0.981107	1.24
Abca1	rs3824479	107604394	A	I61 Intracerebral haemorrhage	-0.00021381	0.23498	0.0625223	0.9768	0.987991	0.882
Abca1	rs2472448	107604507	T	I61 Intracerebral haemorrhage	1.22e-05	0.93261	0.10231	0.4026	0.977443	1.01
Abca1	rs3780546	107604582	T	I61 Intracerebral haemorrhage	0.00038242	0.041128	0.0580042	0.06592	0.978703	1.25
Abca1	rs2487054	107604722	C	I61 Intracerebral haemorrhage	7.75e-05	0.3887	0.403017	0.2403	0.963734	1.05
Abca1	rs56274651	107604918	C	I61 Intracerebral haemorrhage	0.00041558	0.023835	0.0607051	0.05267	0.971447	1.28
Abca1	rs12002265	107604957	T	I61 Intracerebral haemorrhage	-8.35e-05	0.61923	0.07191	0.2705	genotyped	0.952
Abca1	rs145359296	107605204	T	I61 Intracerebral haemorrhage	0.00030522	0.3238	0.020702	0.2309	0.963115	1.2
Abca1	rs28599759	107605344	T	I61 Intracerebral haemorrhage	0.00023233	0.05188	0.159123	0.2895	0.978163	1.15
Abca1	rs34390877	107606044	T	I61 Intracerebral haemorrhage	0.00012344	0.37287	0.111066	0.03989	0.98713	1.08
Abca1	rs113925334	107606129	A	I61 Intracerebral haemorrhage	0.00049742	0.15312	0.0158665	0.0006961	0.986147	1.34
Abca1	rs4149295	107607061	A	I61 Intracerebral haemorrhage	0.00017069	0.18426	0.130907	0.02096	0.9949	1.11
Abca1	rs914544	107607212	C	I61 Intracerebral haemorrhage	0.00036559	0.10988	0.0381475	0.07816	0.980085	1.24
Abca1	rs41483745	107607420	C	I61 Intracerebral haemorrhage	-0.00027982	0.69053	0.00401036	0.8112	0.959922	0.849
Abca1	rs148825246	107608219	G	I61 Intracerebral haemorrhage	0.00060662	0.22969	0.00808661	0.03844	0.911861	1.43
Abca1	rs73521816	107608622	T	I61 Intracerebral haemorrhage	-0.00012538	0.86502	0.00361447	0.7893	0.969621	0.929
Abca1	rs4149292	107609065	A	I61 Intracerebral haemorrhage	0.00012207	0.37585	0.111274	0.0287	0.995507	1.07
Abca1	rs77864495	107609121	A	I61 Intracerebral haemorrhage	-0.00020026	0.46948	0.02512	0.04923	genotyped	0.889
Abca1	rs4149291	107609476	C	I61 Intracerebral haemorrhage	-0.00014782	0.24403	0.1348	0.04777	genotyped	0.917
Abca1	rs116606062	107610009	T	I61 Intracerebral haemorrhage	-0.0001327	0.87246	0.00280496	0.7403	0.974835	0.925
Abca1	rs113337137	107610152	C	I61 Intracerebral haemorrhage	-0.00014474	0.86065	0.00282646	0.7412	0.970119	0.919
Abca1	rs143018779	107610469	C	I61 Intracerebral haemorrhage	-0.00024129	0.67865	0.00595492	0.5447	0.922125	0.868
Abca1	rs147453422	107610647	C	I61 Intracerebral haemorrhage	-0.00013895	0.86634	0.00281734	0.7412	0.9732	0.922
Abca1	rs115763221	107611337	T	I61 Intracerebral haemorrhage	-0.00020969	0.79603	0.00295449	0.7474	0.950132	0.884
Abca1	rs4149290	107611827	C	I61 Intracerebral haemorrhage	6.61e-05	0.62745	0.114578	0.06127	0.993346	1.04
Abca1	rs4149289	107611830	A	I61 Intracerebral haemorrhage	6.6e-05	0.62784	0.114729	0.06382	0.993449	1.04
Abca1	rs537689282	107612426	A	I61 Intracerebral haemorrhage	0.00058482	0.23344	0.00807543	0.08939	0.968406	1.41
Abca1	rs115231467	107612922	G	I61 Intracerebral haemorrhage	-0.00014501	0.86042	0.00282242	0.7412	0.973956	0.919
Abca1	rs115883100	107613082	G	I61 Intracerebral haemorrhage	-0.00018932	0.81661	0.00291085	0.746	0.955164	0.895
Abca1	rs114404472	107613115	T	I61 Intracerebral haemorrhage	-0.00020617	0.79954	0.00294026	0.7469	0.956959	0.886
Abca1	rs76153796	107613364	A	I61 Intracerebral haemorrhage	-0.00019203	0.81419	0.0029035	0.7436	0.956654	0.894
Abca1	rs115467372	107613678	A	I61 Intracerebral haemorrhage	-0.00015311	0.85256	0.0028372	0.7412	0.972229	0.914
Abca1	rs113483939	107614132	C	I61 Intracerebral haemorrhage	-0.00048738	0.16365	0.01555	0.001528	genotyped	0.752
Abca1	rs112979062	107614464	T	I61 Intracerebral haemorrhage	0.00049666	0.15705	0.0154682	0.0008165	0.996314	1.34
Abca1	rs188816861	107615653	T	I61 Intracerebral haemorrhage	0.00034242	0.41697	0.0110018	0.6885	0.968303	1.22
Abca1	rs1340353	107615852	A	I61 Intracerebral haemorrhage	-0.00015266	0.85289	0.00283067	0.7412	0.97691	0.914
Abca1	rs562942184	107615953	A	I61 Intracerebral haemorrhage	-0.00054097	0.61821	0.00174179	0.07028	0.91299	0.728
Abca1	rs1340354	107616084	A	I61 Intracerebral haemorrhage	-0.00017687	0.82935	0.0028752	0.7417	0.959494	0.902
Abca1	rs117995078	107616173	A	I61 Intracerebral haemorrhage	-9.71e-05	0.81603	0.0117209	0.2066	0.919411	0.945
Abca1	rs551929870	107616231	C	I61 Intracerebral haemorrhage	-0.00067584	0.4601	0.00246985	0.1214	0.905312	0.673
Abca1	rs114432666	107617281	C	I61 Intracerebral haemorrhage	-0.00015801	0.84763	0.0028365	0.741	0.976535	0.912
Abca1	rs2487037	107617337	C	I61 Intracerebral haemorrhage	-4.49e-05	0.72475	0.134	0.6574	genotyped	0.974
Abca1	rs2487039	107617433	T	I61 Intracerebral haemorrhage	4.42e-05	0.72819	0.133897	0.3516	0.999576	1.03
Abca1	Affx-80237290	107618254	G	I61 Intracerebral haemorrhage	0.0015217	0.66924	0.0001483	1	genotyped	2.44
Abca1	rs72732679	107618298	A	I61 Intracerebral haemorrhage	0.0009824	0.0091733	0.013735	0.8492	0.969125	1.78
Abca1	rs2472384	107618681	C	I61 Intracerebral haemorrhage	9.42e-05	0.33453	0.26952	0.01164	0.99824	1.06
Abca1	rs2253304	107619063	A	I61 Intracerebral haemorrhage	9.16e-05	0.34672	0.272406	0.008491	0.998277	1.06
Abca1	rs4506285	107619194	T	I61 Intracerebral haemorrhage	5.37e-05	0.68915	0.118283	0.0447	0.995074	1.03
Abca1	rs2472383	107619266	C	I61 Intracerebral haemorrhage	9.44e-05	0.33365	0.269436	0.01348	0.998493	1.06
Abca1	rs143221034	107619346	A	I61 Intracerebral haemorrhage	-0.00011105	0.79968	0.0108187	0.7347	0.906745	0.937
Abca1	rs2472445	107619350	A	I61 Intracerebral haemorrhage	4.39e-05	0.72997	0.133944	0.3401	0.998853	1.03
Abca1	rs2472444	107619510	G	I61 Intracerebral haemorrhage	9.47e-05	0.33228	0.269445	0.01284	0.998706	1.06
Abca1	rs2487055	107619620	T	I61 Intracerebral haemorrhage	9.19e-05	0.34525	0.272241	0.008051	0.998262	1.06
Abca1	rs2472382	107619684	G	I61 Intracerebral haemorrhage	4.8e-05	0.7059	0.134368	0.3721	0.998556	1.03
Abca1	rs114231421	107619763	A	I61 Intracerebral haemorrhage	-0.00015719	0.84842	0.00283569	0.741	0.978056	0.912
Abca1	rs2472441	107619808	A	I61 Intracerebral haemorrhage	9.48e-05	0.3314	0.269381	0.01194	0.998621	1.06
Abca1	rs2487057	107619812	T	I61 Intracerebral haemorrhage	9.48e-05	0.33174	0.269387	0.01194	0.998623	1.06
Abca1	rs2253182	107620124	G	I61 Intracerebral haemorrhage	9.22e-05	0.34375	0.272135	0.009857	0.998307	1.06
Abca1	rs2253175	107620299	T	I61 Intracerebral haemorrhage	9.15e-05	0.34709	0.272246	0.009625	0.998476	1.06
Abca1	rs2253174	107620332	A	I61 Intracerebral haemorrhage	9.21e-05	0.34393	0.272179	0.009381	0.998667	1.06
Abca1	rs2253172	107620387	T	I61 Intracerebral haemorrhage	9.45e-05	0.33384	0.268126	0.01406	0.997635	1.06
Abca1	rs188308962	107620797	A	I61 Intracerebral haemorrhage	0.001012	0.35522	0.001572	0.5795	genotyped	1.81
Abca1	rs2230806	107620867	C	I61 Intracerebral haemorrhage	-7.93e-05	0.419	0.2706	0.2462	genotyped	0.955
Abca1	rs2243313	107621140	C	I61 Intracerebral haemorrhage	9.63e-05	0.32401	0.269345	0.008809	0.999234	1.06
Abca1	rs2482420	107621638	A	I61 Intracerebral haemorrhage	-0.0001045	0.28551	0.2686	0.0301	genotyped	0.941
Abca1	rs4149287	107621672	A	I61 Intracerebral haemorrhage	0.00041464	0.11644	0.028479	0.05019	0.97516	1.28
Abca1	rs2472440	107621921	C	I61 Intracerebral haemorrhage	0.00010501	0.28354	0.268405	0.006709	0.994653	1.06
Abca1	rs2482421	107621977	G	I61 Intracerebral haemorrhage	0.00010549	0.28154	0.268399	0.006535	0.993805	1.06
Abca1	rs2472381	107622098	G	I61 Intracerebral haemorrhage	0.00010706	0.27486	0.268377	0.006882	0.991938	1.06
Abca1	rs542456395	107622292	A	I61 Intracerebral haemorrhage	-0.0010399	0.2935	0.00209427	1	0.915335	0.544
Abca1	rs2472439	107622483	G	I61 Intracerebral haemorrhage	0.0001009	0.30519	0.268074	0.008132	0.985135	1.06
Abca1	rs2472438	107622498	C	I61 Intracerebral haemorrhage	0.00010018	0.30857	0.268169	0.007931	0.985271	1.06
Abca1	rs2472437	107622832	T	I61 Intracerebral haemorrhage	0.00010979	0.26753	0.264714	0.01628	0.981151	1.07
Abca1	rs2482422	107623094	G	I61 Intracerebral haemorrhage	0.0001076	0.27914	0.264285	0.00794	0.974045	1.07
Abca1	rs2472436	107623100	C	I61 Intracerebral haemorrhage	0.00010645	0.28423	0.26437	0.006004	0.974004	1.06
Abca1	rs2472435	107623109	T	I61 Intracerebral haemorrhage	0.00010715	0.28116	0.264306	0.006951	0.97395	1.06
Abca1	rs2472434	107623249	C	I61 Intracerebral haemorrhage	0.00013388	0.17499	0.27261	0.007255	0.968686	1.08
Abca1	rs142678973	107623295	T	I61 Intracerebral haemorrhage	-4.47e-05	0.95925	0.00261682	0.4502	0.937276	0.974
Abca1	rs2472433	107623326	T	I61 Intracerebral haemorrhage	0.00010391	0.29606	0.263908	0.00674	0.974035	1.06
Abca1	rs74526913	107623378	T	I61 Intracerebral haemorrhage	-2.34e-06	0.99789	0.00256924	0.4397	0.941241	0.999
Abca1	rs2472378	107623570	T	I61 Intracerebral haemorrhage	0.00012275	0.2206	0.259249	0.008774	0.970238	1.07
Abca1	rs2487058	107623626	T	I61 Intracerebral haemorrhage	0.00012185	0.22425	0.259221	0.01123	0.969267	1.07
Abca1	rs10114399	107623653	A	I61 Intracerebral haemorrhage	3.68e-05	0.97724	0.00130918	1	0.945303	1.02
Abca1	rs2487059	107623750	G	I61 Intracerebral haemorrhage	0.00011033	0.26957	0.264299	0.006063	0.96183	1.07
Abca1	rs2230805	107624029	T	I61 Intracerebral haemorrhage	0.00015203	0.13405	0.254005	0.002639	0.956483	1.09
Abca1	rs56209001	107624209	C	I61 Intracerebral haemorrhage	3.51e-05	0.86948	0.04296	0.005114	genotyped	1.02
Abca1	rs2249891	107624242	A	I61 Intracerebral haemorrhage	-0.00015525	0.25832	0.1125	0.9862	genotyped	0.913
Abca1	rs2487060	107624383	C	I61 Intracerebral haemorrhage	-5.42e-05	0.71101	0.101264	0.07743	0.956575	0.969
Abca1	rs138333716	107624438	A	I61 Intracerebral haemorrhage	0.0010995	0.052176	0.00635943	0.07504	0.923274	1.9
Abca1	rs1831554	107625312	A	I61 Intracerebral haemorrhage	0.00053774	0.035697	0.0300503	0.976	0.981505	1.37
Abca1	rs4149286	107625803	T	I61 Intracerebral haemorrhage	0.00049898	0.05009	0.0300661	0.8106	0.99208	1.34
Abca1	rs4149285	107625932	A	I61 Intracerebral haemorrhage	-0.00049887	0.047837	0.03056	0.378	genotyped	0.746
Abca1	rs4149284	107626108	A	I61 Intracerebral haemorrhage	0.00045209	0.098511	0.0260734	0.1541	0.987264	1.3
Abca1	rs4149283	107626189	T	I61 Intracerebral haemorrhage	0.00049299	0.053972	0.0300368	0.7622	0.983021	1.33
Abca1	rs142749263	107626271	T	I61 Intracerebral haemorrhage	0.00066706	0.33704	0.00410422	0.6458	0.948726	1.48
Abca1	rs4149282	107626284	G	I61 Intracerebral haemorrhage	0.00053523	0.036405	0.0300422	0.9757	0.983533	1.37
Abca1	rs4149281	107626389	T	I61 Intracerebral haemorrhage	-3.31e-06	0.98053	0.126134	0.9281	0.923331	0.998
Abca1	rs4149280	107626542	C	I61 Intracerebral haemorrhage	-0.00065807	0.019677	0.02431	0.03839	genotyped	0.68
Abca1	rs139150659	107626733	C	I61 Intracerebral haemorrhage	-0.00018239	0.65318	0.0127117	0.2767	0.902159	0.899
Abca1	rs61340780	107626900	A	I61 Intracerebral haemorrhage	-0.00025935	0.52822	0.012232	0.2948	0.9132	0.859
Abca1	rs4149279	107627259	A	I61 Intracerebral haemorrhage	0.00010126	0.28932	0.33611	0.3901	0.91482	1.06
Abca1	rs145114530	107627962	T	I61 Intracerebral haemorrhage	-0.00046505	0.47831	0.00471804	1	0.929022	0.761
Abca1	rs2740499	107628188	G	I61 Intracerebral haemorrhage	-6.82e-05	0.47429	0.2944	0.4373	genotyped	0.961
Abca1	rs148681264	107628390	G	I61 Intracerebral haemorrhage	-0.00031481	0.37202	0.0162302	0.5094	0.939384	0.832
Abca1	rs75259112	107628400	C	I61 Intracerebral haemorrhage	-0.00044817	0.23656	0.01333	0.5185	genotyped	0.769
Abca1	rs75400479	107628712	C	I61 Intracerebral haemorrhage	-0.0015061	0.2365	0.00121744	0.2543	0.962883	0.414
Abca1	rs72732692	107628733	A	I61 Intracerebral haemorrhage	0.00013161	0.48155	0.0571	0.6127	genotyped	1.08
Abca1	rs111373539	107628892	A	I61 Intracerebral haemorrhage	-0.00023277	0.2918	0.0409558	0.9647	0.975628	0.872
Abca1	rs12004282	107629058	T	I61 Intracerebral haemorrhage	-2.71e-05	0.81739	0.167839	0.6886	0.974967	0.984
Abca1	rs4743764	107629104	C	I61 Intracerebral haemorrhage	-5.65e-05	0.53316	0.39298	0.5101	0.955156	0.967
Abca1	rs13301006	107629336	C	I61 Intracerebral haemorrhage	9.46e-05	0.43335	0.1523	0.5828	genotyped	1.06
Abca1	rs72732694	107629601	A	I61 Intracerebral haemorrhage	-4.71e-05	0.76964	0.0804964	0.5472	0.980639	0.973
Abca1	rs189953132	107629858	A	I61 Intracerebral haemorrhage	0.00018228	0.57217	0.0192752	0.7461	0.952951	1.11
Abca1	rs75815430	107630028	A	I61 Intracerebral haemorrhage	4.36e-05	0.84992	0.0378297	0.906	0.972839	1.03
Abca1	rs561399340	107630193	C	I61 Intracerebral haemorrhage	-0.00034305	0.59607	0.00485113	0.1435	0.926776	0.818
Abca1	rs117860433	107630430	T	I61 Intracerebral haemorrhage	-7.45e-06	0.97252	0.0427787	1	0.978917	0.996
Abca1	rs10991386	107630433	G	I61 Intracerebral haemorrhage	-6.63e-06	0.94009	0.443195	0.7614	0.974463	0.996
Abca1	rs112460067	107630570	C	I61 Intracerebral haemorrhage	0.0001496	0.64003	0.0195619	0.5529	0.953517	1.09
Abca1	rs146744108	107630582	A	I61 Intracerebral haemorrhage	-8.38e-06	0.96909	0.0428082	0.9833	0.979815	0.995
Abca1	rs13291032	107630620	T	I61 Intracerebral haemorrhage	-7.92e-05	0.46974	0.196164	0.3987	0.99318	0.955
Abca1	rs72732695	107630859	C	I61 Intracerebral haemorrhage	0.00030616	0.2997	0.02218	0.8145	genotyped	1.2
Abca1	rs57989482	107631071	T	I61 Intracerebral haemorrhage	6.64e-05	0.52742	0.224517	0.9603	0.971979	1.04
Abca1	rs10118061	107631134	A	I61 Intracerebral haemorrhage	-9.46e-05	0.38628	0.198017	0.2138	0.991309	0.946
Abca1	rs76481425	107631307	A	I61 Intracerebral haemorrhage	-4.91e-06	0.98186	0.0426792	0.9498	0.984605	0.997
Abca1	rs142664016	107631832	A	I61 Intracerebral haemorrhage	0.00026104	0.54252	0.0109267	0.3109	0.936576	1.17
Abca1	rs11791258	107632644	G	I61 Intracerebral haemorrhage	8.61e-05	0.43888	0.1919	8.95e-15	genotyped	1.05
Abca1	rs4149276	107632660	G	I61 Intracerebral haemorrhage	8.95e-05	0.43401	0.176519	0.5849	0.981982	1.05
Abca1	rs1929842	107633623	G	I61 Intracerebral haemorrhage	-5.46e-05	0.60221	0.2204	0.269	genotyped	0.969
Abca1	rs1929841	107633725	C	I61 Intracerebral haemorrhage	7.12e-05	0.51926	0.190448	0.7889	0.993902	1.04
Abca1	rs1340355	107633777	A	I61 Intracerebral haemorrhage	-0.0016898	0.18534	0.00123634	0.2502	0.911367	0.371
Abca1	rs72732698	107633815	C	I61 Intracerebral haemorrhage	-0.00012163	0.58875	0.0389331	0.1487	0.993366	0.931
Abca1	rs76716911	107633845	A	I61 Intracerebral haemorrhage	5.61e-05	0.79289	0.04313	0.6202	genotyped	1.03
Abca1	rs57353097	107634102	C	I61 Intracerebral haemorrhage	-4.64e-05	0.82866	0.042858	0.9668	0.992256	0.973
Abca1	rs746863212	107634550	C	I61 Intracerebral haemorrhage	-0.00065996	0.60192	0.00123203	1	0.945235	0.679
Abca1	rs4742927	107634640	A	I61 Intracerebral haemorrhage	8.55e-06	0.93354	0.234253	0.7628	0.993647	1.01
Abca1	rs28558214	107634783	G	I61 Intracerebral haemorrhage	-6.75e-05	0.75186	0.0434217	0.7104	0.983933	0.961
Abca1	rs2777782	107634951	T	I61 Intracerebral haemorrhage	0.00028105	0.56579	0.00863824	1	0.911106	1.18
Abca1	rs73504136	107635507	C	I61 Intracerebral haemorrhage	0.00012635	0.68659	0.019839	0.7229	0.98005	1.08
Abca1	rs548570476	107635557	T	I61 Intracerebral haemorrhage	0.00017586	0.81459	0.00361717	1	0.918018	1.11
Abca1	rs145225245	107635766	T	I61 Intracerebral haemorrhage	-0.0017979	0.20224	0.00101939	1	0.906948	0.349
Abca1	rs2000069	107635869	C	I61 Intracerebral haemorrhage	2.13e-06	0.98064	0.4355	0.2043	genotyped	1
Abca1	rs111919605	107636559	A	I61 Intracerebral haemorrhage	4.78e-05	0.66665	0.190095	0.7495	0.986035	1.03
Abca1	rs13285112	107636707	A	I61 Intracerebral haemorrhage	6.07e-06	0.94489	0.434606	0.476	0.993118	1
Abca1	rs552034591	107637081	T	I61 Intracerebral haemorrhage	-0.00096524	0.085513	0.00643807	0.6683	0.92949	0.568
Abca1	rs185776746	107637247	A	I61 Intracerebral haemorrhage	-0.00021553	0.54038	0.016089	0.3054	0.952614	0.881
Abca1	rs59237458	107637306	G	I61 Intracerebral haemorrhage	8.23e-07	0.99253	0.435171	0.3943	0.988955	1
Abca1	rs12346461	107637863	C	I61 Intracerebral haemorrhage	-6.98e-05	0.74508	0.0433921	0.8353	0.975922	0.96
Abca1	rs76244174	107637937	T	I61 Intracerebral haemorrhage	-6.26e-05	0.77109	0.0431791	0.8511	0.979745	0.964
Abca1	rs12350745	107638062	C	I61 Intracerebral haemorrhage	-6.3e-05	0.76951	0.0432097	0.8347	0.979862	0.964
Abca1	rs117930054	107638194	A	I61 Intracerebral haemorrhage	0.00014405	0.64665	0.019681	0.6861	0.983904	1.09
Abca1	rs4149275	107638507	G	I61 Intracerebral haemorrhage	4.4e-05	0.70785	0.167855	0.2707	0.969409	1.03
Abca1	rs140277506	107638698	G	I61 Intracerebral haemorrhage	4.24e-05	0.89114	0.0203448	0.6941	0.978272	1.03
Abca1	rs67740686	107639180	A	I61 Intracerebral haemorrhage	8.14e-05	0.55385	0.114564	0.2858	0.977802	1.05
Abca1	rs75516297	107639297	C	I61 Intracerebral haemorrhage	-0.00085023	0.51724	0.00120721	1	0.911541	0.608
Abca1	rs4149274	107639414	A	I61 Intracerebral haemorrhage	2.49e-05	0.79055	0.318327	0.4078	0.9797	1.01
Abca1	rs117642205	107640410	G	I61 Intracerebral haemorrhage	0.00067345	0.31179	0.00461805	0.1757	0.923521	1.48
Abca1	rs1999430	107640688	A	I61 Intracerebral haemorrhage	-3.14e-05	0.91381	0.0230329	0.6739	0.985121	0.982
Abca1	rs1999429	107640786	T	I61 Intracerebral haemorrhage	-0.00017136	0.53654	0.0252814	0.722	0.991834	0.904
Abca1	rs761980782	107641287	A	I61 Intracerebral haemorrhage	0.001971	0.04119	0.00214063	0.6603	0.939348	3.17
Abca1	rs190343834	107641342	A	I61 Intracerebral haemorrhage	-0.00030028	0.40067	0.0156394	0.4253	0.956584	0.839
Abca1	rs56948527	107642019	G	I61 Intracerebral haemorrhage	-0.00017457	0.52817	0.0253953	0.7494	0.991684	0.903
Abca1	rs4149273	107642211	C	I61 Intracerebral haemorrhage	1.44e-05	0.87433	0.357502	0.3497	0.993699	1.01
Abca1	rs4149272	107642287	T	I61 Intracerebral haemorrhage	1.46e-05	0.87205	0.357421	0.3575	0.993535	1.01
Abca1	rs12001061	107643080	A	I61 Intracerebral haemorrhage	1.43e-05	0.87477	0.357459	0.3595	0.994497	1.01
Abca1	rs12006437	107643120	C	I61 Intracerebral haemorrhage	0.00084499	0.14798	0.005548	0.6008	genotyped	1.64
Abca1	rs12002435	107643299	C	I61 Intracerebral haemorrhage	-0.00084911	0.1465	0.00554056	0.6	0.996593	0.608
Abca1	rs143112685	107643327	A	I61 Intracerebral haemorrhage	0.00031882	0.61828	0.00479042	0.2683	0.961869	1.21
Abca1	rs148281698	107643361	A	I61 Intracerebral haemorrhage	4.56e-06	0.9883	0.0199588	0.482	0.992448	1
Abca1	rs139025219	107643590	C	I61 Intracerebral haemorrhage	9.17e-05	0.78816	0.0165337	0.1042	0.983681	1.06
Abca1	rs62568179	107643786	A	I61 Intracerebral haemorrhage	3.3e-05	0.80207	0.124118	0.7951	0.994049	1.02
Abca1	rs11790326	107643810	C	I61 Intracerebral haemorrhage	1.38e-05	0.89696	0.211014	0.7072	0.992473	1.01
Abca1	rs116856985	107643936	A	I61 Intracerebral haemorrhage	-0.00032622	0.36186	0.0150427	0.4862	0.990951	0.826
Abca1	rs7859265	107644124	C	I61 Intracerebral haemorrhage	-0.0015613	0.076601	0.00245398	1	0.989508	0.4
Abca1	rs115950766	107644138	T	I61 Intracerebral haemorrhage	3.95e-06	0.98985	0.0200042	0.4825	0.991658	1
Abca1	rs4149271	107644287	A	I61 Intracerebral haemorrhage	1.39e-05	0.89615	0.210994	0.7148	0.992653	1.01
Abca1	rs3858074	107644737	C	I61 Intracerebral haemorrhage	1.46e-05	0.89074	0.210844	0.7033	0.991776	1.01
Abca1	rs3858075	107644830	T	I61 Intracerebral haemorrhage	1.57e-05	0.88289	0.210733	0.7185	0.991455	1.01
Abca1	rs2275542	107645080	T	I61 Intracerebral haemorrhage	2.94e-05	0.75322	0.314721	0.7241	0.992273	1.02
Abca1	rs41419649	107645244	C	I61 Intracerebral haemorrhage	3.06e-06	0.99214	0.0200085	0.4828	0.991822	1
Abca1	rs12003906	107645477	T	I61 Intracerebral haemorrhage	-0.0015722	0.077289	0.00242954	1	0.983294	0.398
Abca1	rs62568181	107645674	C	I61 Intracerebral haemorrhage	4.45e-05	0.755	0.103686	0.1764	0.995793	1.03
Abca1	rs7040990	107645906	G	I61 Intracerebral haemorrhage	-0.0015625	0.081519	0.00238332	1	0.982022	0.4
Abca1	rs13283515	107645922	C	I61 Intracerebral haemorrhage	4.55e-05	0.74984	0.103658	0.1885	0.996342	1.03
Abca1	rs3904997	107646009	A	I61 Intracerebral haemorrhage	1.35e-05	0.89939	0.210723	0.6032	0.992997	1.01
Abca1	rs146458003	107646085	A	I61 Intracerebral haemorrhage	-0.0015479	0.10478	0.00211767	0.5906	0.960545	0.404
Abca1	rs7041412	107646224	A	I61 Intracerebral haemorrhage	-0.0015532	0.10258	0.00212256	0.5952	0.951637	0.402
Abca1	rs3904998	107646260	C	I61 Intracerebral haemorrhage	1.28e-05	0.90445	0.21074	0.6176	0.993104	1.01
Abca1	rs3904999	107646289	T	I61 Intracerebral haemorrhage	1.34e-05	0.90018	0.210715	0.6249	0.993328	1.01
Abca1	rs145183203	107646756	G	I61 Intracerebral haemorrhage	0.00010686	0.9277	0.001361	1	genotyped	1.06
Abca1	rs11789603	107647019	T	I61 Intracerebral haemorrhage	-0.00010226	0.46499	0.10797	0.6641	0.993039	0.942
Abca1	rs4149270	107647077	A	I61 Intracerebral haemorrhage	1.26e-05	0.89108	0.329851	0.5464	0.997628	1.01
Abca1	rs75602357	107647106	T	I61 Intracerebral haemorrhage	5.08e-06	0.98695	0.0199521	0.4822	0.994279	1
Abca1	rs4149269	107647121	G	I61 Intracerebral haemorrhage	1.75e-05	0.84557	0.366655	0.5125	0.998687	1.01
Abca1	rs4149268	107647220	C	I61 Intracerebral haemorrhage	-1.15e-06	0.98984	0.3681	0.1296	genotyped	0.999
Abca1	rs7046079	107647504	T	I61 Intracerebral haemorrhage	-8.53e-05	0.79122	0.0185786	0.443	0.987651	0.951
Abca1	rs3890182	107647655	G	I61 Intracerebral haemorrhage	-3.08e-05	0.81656	0.1216	0.497	genotyped	0.982
Abca1	rs147012455	107647772	G	I61 Intracerebral haemorrhage	8.73e-05	0.79689	0.0166407	0.1598	0.994658	1.05
Abca1	rs2777783	107647978	T	I61 Intracerebral haemorrhage	0.00029511	0.40195	0.0168433	0.7093	0.909644	1.19
Abca1	rs2740495	107647980	T	I61 Intracerebral haemorrhage	0.00029504	0.40198	0.0168466	0.7094	0.909782	1.19
Abca1	rs186123267	107647986	C	I61 Intracerebral haemorrhage	-0.00029381	0.70659	0.00311762	0.5741	0.986092	0.842
Abca1	rs117976590	107647992	C	I61 Intracerebral haemorrhage	0.00032924	0.35745	0.01513	6.58e-23	genotyped	1.21
Abca1	rs72732702	107648409	A	I61 Intracerebral haemorrhage	1.35e-06	0.98962	0.223976	0.949	0.996984	1
Abca1	rs3847300	107648430	A	I61 Intracerebral haemorrhage	2.89e-05	0.82749	0.121699	0.6093	0.999478	1.02
Abca1	rs2417565	107648458	A	I61 Intracerebral haemorrhage	2.67e-05	0.8406	0.121863	0.684	0.997421	1.02
Abca1	rs3847301	107648519	C	I61 Intracerebral haemorrhage	2.53e-05	0.84842	0.121854	0.6898	0.997073	1.01
Abca1	rs3847302	107648595	G	I61 Intracerebral haemorrhage	2.78e-05	0.83421	0.121648	0.6259	0.998813	1.02
Abca1	rs3847303	107648652	T	I61 Intracerebral haemorrhage	2.5e-05	0.8505	0.121851	0.6955	0.996896	1.01
Abca1	rs13290420	107648965	C	I61 Intracerebral haemorrhage	2.43e-05	0.85486	0.121881	0.6955	0.996604	1.01
Abca1	rs13286991	107649380	G	I61 Intracerebral haemorrhage	2.39e-05	0.85712	0.121879	0.6955	0.996552	1.01
Abca1	rs13286395	107649419	T	I61 Intracerebral haemorrhage	2.38e-05	0.85731	0.121884	0.7014	0.996497	1.01
Abca1	rs7027196	107649606	T	I61 Intracerebral haemorrhage	2.37e-05	0.8584	0.121867	0.7073	0.996579	1.01
Abca1	rs7043081	107649611	T	I61 Intracerebral haemorrhage	2.37e-05	0.8584	0.121867	0.7073	0.996579	1.01
Abca1	rs7043581	107649984	G	I61 Intracerebral haemorrhage	2.3e-05	0.862	0.121889	0.7133	0.996397	1.01
Abca1	rs34171271	107650317	C	I61 Intracerebral haemorrhage	2.28e-05	0.86352	0.12188	0.7132	0.996417	1.01
Abca1	rs62568182	107650343	G	I61 Intracerebral haemorrhage	2.39e-05	0.85841	0.120259	0.5614	0.99047	1.01
Abca1	rs148317038	107650422	A	I61 Intracerebral haemorrhage	-0.00026343	0.36323	0.0243893	0.2475	0.931435	0.857
Abca1	rs13292582	107650430	G	I61 Intracerebral haemorrhage	2.28e-05	0.86346	0.12187	0.7132	0.996311	1.01
Abca1	rs72735003	107650513	T	I61 Intracerebral haemorrhage	-7.77e-05	0.77887	0.0253126	0.5575	0.993311	0.956
Abca1	rs142156695	107650533	A	I61 Intracerebral haemorrhage	0.00010246	0.76401	0.0164963	0.2081	0.990311	1.06
Abca1	rs7047523	107650575	C	I61 Intracerebral haemorrhage	8.27e-06	0.92675	0.368742	0.3781	0.997481	1
Abca1	rs2791948	107650578	C	I61 Intracerebral haemorrhage	0.00017507	0.12528	0.177978	0.5025	0.984757	1.11
Abca1	rs10991390	107650676	A	I61 Intracerebral haemorrhage	5.67e-05	0.84972	0.02148	0.6549	genotyped	1.03
Abca1	rs35699471	107650820	T	I61 Intracerebral haemorrhage	3.82e-05	0.77606	0.118361	0.1692	0.997714	1.02
Abca1	rs184847043	107650828	T	I61 Intracerebral haemorrhage	-0.00027533	0.72512	0.00309089	0.57	0.989456	0.851
Abca1	rs10115928	107650843	T	I61 Intracerebral haemorrhage	8.22e-06	0.92718	0.368755	0.382	0.997069	1
Abca1	rs189190280	107650992	A	I61 Intracerebral haemorrhage	-0.00027487	0.72571	0.00308753	0.5697	0.989414	0.851
Abca1	rs138492267	107651030	T	I61 Intracerebral haemorrhage	0.00010406	0.7603	0.0164963	0.1725	0.991498	1.06
Abca1	rs2275543	107651174	C	I61 Intracerebral haemorrhage	2.31e-05	0.87199	0.101969	0.243	0.996453	1.01
Abca1	rs2275544	107651212	C	I61 Intracerebral haemorrhage	3.14e-05	0.80277	0.138522	0.4698	0.998501	1.02
Abca1	rs150520154	107651357	T	I61 Intracerebral haemorrhage	0.00010122	0.76631	0.0165267	0.1568	0.992489	1.06
Abca1	rs2275545	107651526	G	I61 Intracerebral haemorrhage	3.06e-05	0.80552	0.142425	0.4667	0.996721	1.02
Abca1	rs4149267	107651945	C	I61 Intracerebral haemorrhage	7.92e-06	0.92989	0.368792	0.376	0.996976	1
Abca1	rs147614624	107652289	T	I61 Intracerebral haemorrhage	-0.00028208	0.71837	0.00310249	0.5729	0.988535	0.848
Abca1	rs73504175	107652341	C	I61 Intracerebral haemorrhage	-0.0015182	0.19869	0.00140489	0.2543	0.970018	0.411
Abca1	rs12686004	107653426	G	I61 Intracerebral haemorrhage	-0.00013303	0.32931	0.1145	0.1228	genotyped	0.925
Abca1	rs193019384	107653936	T	I61 Intracerebral haemorrhage	-0.0015695	0.12567	0.00183671	0.4975	0.960127	0.399
Abca1	rs138405364	107654103	A	I61 Intracerebral haemorrhage	1.2e-06	0.99692	0.0200014	0.4826	0.989686	1
Abca1	rs188132621	107654172	A	I61 Intracerebral haemorrhage	-0.00027657	0.72398	0.00309298	0.5697	0.988977	0.85
Abca1	rs540324364	107655097	C	I61 Intracerebral haemorrhage	-0.00041644	0.49864	0.00549877	0.8683	0.906226	0.783
Abca1	rs79674744	107655149	T	I61 Intracerebral haemorrhage	-1.25e-05	0.96776	0.0201604	0.4868	0.994159	0.993
Abca1	rs150713429	107655199	C	I61 Intracerebral haemorrhage	0.00010396	0.76046	0.0164902	0.1721	0.992347	1.06
Abca1	rs143517393	107655235	G	I61 Intracerebral haemorrhage	-0.0002747	0.72592	0.00308732	0.5697	0.989678	0.851
Abca1	rs10125482	107655426	T	I61 Intracerebral haemorrhage	3e-05	0.82311	0.118404	0.1824	0.997096	1.02
Abca1	rs113647163	107655596	A	I61 Intracerebral haemorrhage	0.00044481	0.072186	0.0347261	0.3342	0.910782	1.3
Abca1	rs3847304	107655848	C	I61 Intracerebral haemorrhage	2.43e-05	0.81537	0.223883	0.9137	0.994654	1.01
Abca1	rs3858076	107656122	C	I61 Intracerebral haemorrhage	1.25e-05	0.91964	0.141981	0.5603	0.995864	1.01
Abca1	rs2740494	107656150	C	I61 Intracerebral haemorrhage	1.42e-05	0.87462	0.368476	0.4064	0.996294	1.01
Abca1	rs79433302	107656293	T	I61 Intracerebral haemorrhage	-1.2e-05	0.9691	0.0201544	0.4867	0.994591	0.993
Abca1	rs189973510	107656424	C	I61 Intracerebral haemorrhage	0.00025838	0.63428	0.00676677	1	0.941447	1.16
Abca1	rs3905000	107657070	G	I61 Intracerebral haemorrhage	-7.32e-06	0.95358	0.1382	0.1069	genotyped	0.996
Abca1	rs3847305	107657253	C	I61 Intracerebral haemorrhage	-2.06e-05	0.86738	0.14418	0.6219	0.996488	0.988
Abca1	rs7848844	107657356	G	I61 Intracerebral haemorrhage	-0.0016123	0.082071	0.00228734	0.6294	0.962311	0.389
Abca1	rs2740493	107657825	T	I61 Intracerebral haemorrhage	1.19e-05	0.89478	0.368304	0.4021	0.995275	1.01
Abca1	rs2740492	107658248	T	I61 Intracerebral haemorrhage	2.3e-06	0.98231	0.226043	0.6204	0.99236	1
Abca1	rs2740491	107658385	A	I61 Intracerebral haemorrhage	1.02e-05	0.90956	0.368666	0.4402	0.994255	1.01
Abca1	rs72735008	107658723	T	I61 Intracerebral haemorrhage	-3.34e-05	0.90402	0.0252863	0.604	0.990809	0.981
Abca1	rs12341993	107658910	A	I61 Intracerebral haemorrhage	2.02e-05	0.88068	0.118583	0.1984	0.992403	1.01
Abca1	rs80170476	107659084	A	I61 Intracerebral haemorrhage	0.00010224	0.7645	0.0165129	0.1413	0.987848	1.06
Abca1	rs3983644	107659093	T	I61 Intracerebral haemorrhage	8.52e-06	0.93474	0.225787	0.6479	0.988958	1.01
Abca1	rs2027403	107659105	A	I61 Intracerebral haemorrhage	1.27e-05	0.88819	0.368339	0.3169	0.990683	1.01
Abca1	rs10991401	107660570	A	I61 Intracerebral haemorrhage	-6.02e-05	0.84188	0.0214194	0.8067	0.98383	0.965
Abca1	rs2099544	107660780	T	I61 Intracerebral haemorrhage	1.95e-05	0.82792	0.375223	0.2026	0.991966	1.01
Abca1	rs79120891	107661049	C	I61 Intracerebral haemorrhage	-0.00017994	0.49562	0.02784	0.6405	genotyped	0.9
Abca1	rs2777784	107661059	G	I61 Intracerebral haemorrhage	1.91e-05	0.83178	0.375257	0.195	0.991932	1.01
Abca1	rs2244278	107661129	A	I61 Intracerebral haemorrhage	0.00013257	0.32072	0.120408	0.7328	0.994131	1.08
Abca1	rs10120087	107661150	A	I61 Intracerebral haemorrhage	-0.00011098	0.43333	0.106168	0.3988	0.981932	0.937
Abca1	rs117262824	107661423	A	I61 Intracerebral haemorrhage	0.00022089	0.55056	0.0146561	0.7152	0.945307	1.14
Abca1	rs2777786	107661561	G	I61 Intracerebral haemorrhage	1.82e-05	0.83933	0.375389	0.1768	0.992088	1.01
Abca1	rs2777787	107661735	G	I61 Intracerebral haemorrhage	1.85e-05	0.8368	0.375373	0.1851	0.992069	1.01
Abca1	rs2740488	107661742	C	I61 Intracerebral haemorrhage	7.58e-05	0.44125	0.265249	0.5678	0.994495	1.05
Abca1	rs117079474	107662134	C	I61 Intracerebral haemorrhage	-0.00022868	0.37492	0.02936	0.003283	genotyped	0.875
Abca1	rs73664373	107662304	C	I61 Intracerebral haemorrhage	-9.8e-05	0.53468	0.083455	0.902	0.982192	0.944
Abca1	rs73664374	107662305	G	I61 Intracerebral haemorrhage	-9.78e-05	0.53517	0.08345	0.8932	0.982203	0.944
Abca1	rs2575875	107662494	A	I61 Intracerebral haemorrhage	7.94e-06	0.9297	0.372687	0.2966	0.990683	1
Abca1	rs77780610	107662659	C	I61 Intracerebral haemorrhage	5.93e-06	0.9848	0.019973	0.568	0.989586	1
Abca1	rs2791950	107662691	C	I61 Intracerebral haemorrhage	5.71e-07	0.99496	0.372685	0.1553	0.981835	1
Abca1	rs2777788	107662701	G	I61 Intracerebral haemorrhage	-6.87e-06	0.93977	0.370214	0.1132	0.97562	0.996
Abca1	rs4149266	107662705	G	I61 Intracerebral haemorrhage	-4.69e-06	0.95884	0.370786	0.1202	0.977115	0.997
Abca1	rs2777789	107662708	T	I61 Intracerebral haemorrhage	-3.44e-06	0.96982	0.370232	0.1208	0.975406	0.998
Abca1	rs61319799	107662812	G	I61 Intracerebral haemorrhage	-0.00012085	0.38752	0.109544	0.359	0.980571	0.932
Abca1	rs2777790	107663039	T	I61 Intracerebral haemorrhage	-1.27e-07	0.99888	0.372936	0.3053	0.990622	1
Abca1	rs2777791	107663065	G	I61 Intracerebral haemorrhage	1.19e-05	0.89466	0.374878	0.1947	0.990572	1.01
Abca1	rs2777792	107663094	T	I61 Intracerebral haemorrhage	-1.02e-07	0.99909	0.372942	0.3053	0.990489	1
Abca1	rs77083720	107663762	A	I61 Intracerebral haemorrhage	-4.97e-05	0.94275	0.00405837	0.6542	0.963381	0.971
Abca1	rs893058	107663893	A	I61 Intracerebral haemorrhage	-0.00010427	0.75044	0.0179704	0.4634	0.987285	0.941
Abca1	rs74865437	107664111	C	I61 Intracerebral haemorrhage	5.37e-05	0.82807	0.03193	0.07257	genotyped	1.03
Abca1	rs1883025	107664301	C	I61 Intracerebral haemorrhage	-0.00010612	0.2868	0.2542	0.8708	genotyped	0.94
Abca1	rs73664375	107664373	T	I61 Intracerebral haemorrhage	-9.93e-05	0.53238	0.082327	0.8382	0.980214	0.943
Abca1	rs3758294	107664815	C	I61 Intracerebral haemorrhage	0.00013888	0.19928	0.203158	0.4595	0.992018	1.08
Abca1	rs2740487	107664961	G	I61 Intracerebral haemorrhage	0.00013771	0.11575	0.45287	0.4668	0.989353	1.08
Abca1	rs2777793	107665511	T	I61 Intracerebral haemorrhage	0.00015455	0.076362	0.458109	0.5335	0.996177	1.09
Abca1	rs2575876	107665739	G	I61 Intracerebral haemorrhage	-8.87e-05	0.37483	0.252	0.3661	genotyped	0.949
Abca1	rs2482424	107665751	T	I61 Intracerebral haemorrhage	9.99e-05	0.44698	0.137867	0.6314	0.909468	1.06
Abca1	Affx-89013810	107665890	C	I61 Intracerebral haemorrhage	-0.0061766	0.092675	0.0001398	1	genotyped	0.0268
Abca1	rs1800978	107665978	G	I61 Intracerebral haemorrhage	0.0001508	0.25326	0.124321	0.6461	0.989117	1.09
Abca1	rs182306298	107666268	G	I61 Intracerebral haemorrhage	-0.00032949	0.67009	0.00319772	0.5874	0.979716	0.824
Abca1	rs72735011	107666345	T	I61 Intracerebral haemorrhage	-3.56e-05	0.89791	0.0253013	0.5332	0.987758	0.979
Abca1	rs2254819	107666414	T	I61 Intracerebral haemorrhage	-0.0001404	0.10717	0.4685	0.02665	genotyped	0.921
Abca1	rs2740486	107666513	G	I61 Intracerebral haemorrhage	0.00015162	0.081355	0.468128	0.2579	0.999257	1.09
Abca1	rs137967290	107666614	A	I61 Intracerebral haemorrhage	-0.00026162	0.41285	0.0204224	0.3641	0.911511	0.858
Abca1	rs2575877	107666772	C	I61 Intracerebral haemorrhage	0.00013126	0.13436	0.445355	0.4069	0.990105	1.08
Abca1	rs2575878	107667079	C	I61 Intracerebral haemorrhage	0.00013377	0.12758	0.445382	0.4449	0.987309	1.08
Abca1	rs2254708	107667147	C	I61 Intracerebral haemorrhage	0.00012126	0.30408	0.163065	0.725	0.986733	1.07
Abca1	rs3905001	107668064	C	I61 Intracerebral haemorrhage	5.87e-05	0.54487	0.289708	0.9139	0.967999	1.04
Abca1	rs80253084	107668067	T	I61 Intracerebral haemorrhage	-0.00010186	0.75683	0.0179218	0.4045	0.980957	0.942
Abca1	rs2575879	107668825	C	I61 Intracerebral haemorrhage	0.00011682	0.19331	0.431823	0.7311	0.94689	1.07
Abca1	rs189033753	107668879	C	I61 Intracerebral haemorrhage	-0.00028674	0.71516	0.00312264	0.5677	0.969459	0.845
Abca1	rs2777794	107668886	T	I61 Intracerebral haemorrhage	0.000119	0.1853	0.431601	0.8552	0.945736	1.07
Abca1	rs13284054	107669073	C	I61 Intracerebral haemorrhage	1.48e-05	0.91192	0.124539	0.9811	0.952276	1.01
Abca1	rs4100654	107669241	C	I61 Intracerebral haemorrhage	3.38e-05	0.82183	0.0970397	0.2503	0.946829	1.02
Abca1	rs78174930	107669299	C	I61 Intracerebral haemorrhage	0.00029523	0.36931	0.017717	0.2391	0.994754	1.19
Abca1	rs150856136	107669680	A	I61 Intracerebral haemorrhage	-0.00031089	0.69002	0.00318782	0.5757	0.965336	0.833
Abca1	rs41426948	107669732	A	I61 Intracerebral haemorrhage	-0.00035087	0.28423	0.0178	0.3534	genotyped	0.814
Abca1	rs147718025	107669981	T	I61 Intracerebral haemorrhage	-0.0015521	0.24229	0.00115461	0.2251	0.908296	0.403
Abca1	rs7854775	107670674	G	I61 Intracerebral haemorrhage	-4.83e-05	0.73822	0.10646	0.7493	0.93861	0.972
Abca1	rs143886467	107671011	T	I61 Intracerebral haemorrhage	-0.00021034	0.60813	0.0121917	0.7104	0.921759	0.884
Abca1	rs10820743	107671659	C	I61 Intracerebral haemorrhage	0.00011135	0.25633	0.294149	0.1781	0.93718	1.07
Abca1	rs183138020	107671705	T	I61 Intracerebral haemorrhage	-0.00035661	0.64427	0.00324232	0.5868	0.96634	0.811
Abca1	rs10820744	107671935	G	I61 Intracerebral haemorrhage	9.79e-05	0.28435	0.414636	0.6441	0.920608	1.06
Abca1	rs2777795	107672365	A	I61 Intracerebral haemorrhage	7.66e-05	0.59905	0.106033	0.3974	0.929509	1.05
Abca1	rs4149265	107672498	A	I61 Intracerebral haemorrhage	0.0001249	0.2057	0.292025	0.1201	0.930178	1.08
Abca1	rs62568199	107672526	G	I61 Intracerebral haemorrhage	4.93e-05	0.75419	0.0894446	0.1838	0.928519	1.03
Abca1	rs73506128	107673640	C	I61 Intracerebral haemorrhage	-1.62e-05	0.9478	0.0332572	0.3707	0.945132	0.991
Abca1	rs77852426	107674114	G	I61 Intracerebral haemorrhage	8.36e-05	0.75365	0.02732	0.7721	genotyped	1.05
Abca1	rs10521071	107674890	G	I61 Intracerebral haemorrhage	-2.49e-05	0.92745	0.0279269	0.2116	0.916639	0.986
Abca1	rs140348304	107676469	C	I61 Intracerebral haemorrhage	-0.00016418	0.49433	0.0359995	0.6341	0.936504	0.908
Abca1	rs62568200	107676577	C	I61 Intracerebral haemorrhage	0.00017458	0.27065	0.0848303	0.2525	0.96341	1.11
Abca1	rs1175453	107676706	A	I61 Intracerebral haemorrhage	-9.25e-05	0.38423	0.22613	0.2421	0.945505	0.947
Abca1	rs2575874	107676758	G	I61 Intracerebral haemorrhage	0.00014345	0.18211	0.212444	0.7594	0.969389	1.09
Abca1	rs12237054	107676940	A	I61 Intracerebral haemorrhage	-0.00020929	0.18945	0.08077	0.03749	genotyped	0.885
Abca1	rs4149264	107677211	C	I61 Intracerebral haemorrhage	-5.39e-05	0.62434	0.192721	0.09389	0.99885	0.969
Abca1	rs79813326	107677276	A	I61 Intracerebral haemorrhage	0.00019455	0.43952	0.0316994	0.5932	0.965419	1.12
Abca1	rs4149263	107677289	A	I61 Intracerebral haemorrhage	6.87e-05	0.53248	0.1933	0.01007	genotyped	1.04
Abca1	rs147278663	107677463	C	I61 Intracerebral haemorrhage	0.00078103	0.16429	0.00631296	0.5631	0.935659	1.58
Abca1	rs10991404	107677482	A	I61 Intracerebral haemorrhage	6.56e-05	0.66945	0.0875111	0.5952	0.997398	1.04
Abca1	rs10991405	107677512	C	I61 Intracerebral haemorrhage	6.73e-05	0.66171	0.0874277	0.5235	0.996321	1.04
Abca1	rs4149262	107677932	T	I61 Intracerebral haemorrhage	0.00019224	0.22739	0.0812601	0.1842	0.99392	1.12
Abca1	rs10991406	107677935	C	I61 Intracerebral haemorrhage	6.27e-05	0.68278	0.0876619	0.5738	0.99756	1.04
Abca1	rs10991407	107678011	G	I61 Intracerebral haemorrhage	6.25e-05	0.68372	0.0876724	0.5738	0.997444	1.04
Abca1	rs148596232	107678258	A	I61 Intracerebral haemorrhage	-1.04e-05	0.98376	0.0079107	0.6273	0.905404	0.994
Abca1	rs4149261	107678278	T	I61 Intracerebral haemorrhage	0.00018479	0.21555	0.0940535	0.08652	0.99227	1.11
Abca1	rs12350560	107678446	A	I61 Intracerebral haemorrhage	6.39e-05	0.67701	0.0875904	0.6029	0.998614	1.04
Abca1	rs12344687	107678640	T	I61 Intracerebral haemorrhage	6.41e-05	0.67641	0.0875793	0.6029	0.998537	1.04
Abca1	rs12335854	107678776	T	I61 Intracerebral haemorrhage	6.36e-05	0.67844	0.0876	0.6103	0.999044	1.04
Abca1	rs2515618	107678797	T	I61 Intracerebral haemorrhage	2.09e-05	0.8337	0.255283	0.7597	0.992948	1.01
Abca1	rs10991408	107678916	C	I61 Intracerebral haemorrhage	0.00019196	0.22802	0.0813133	0.1881	0.993607	1.12
Abca1	rs10991409	107679141	C	I61 Intracerebral haemorrhage	0.00019357	0.22422	0.0812651	0.188	0.993789	1.12
Abca1	rs189704012	107679175	C	I61 Intracerebral haemorrhage	-0.00051552	0.21779	0.0115477	0.1386	0.934666	0.739
Abca1	rs10991410	107679200	T	I61 Intracerebral haemorrhage	0.00019336	0.22473	0.0812686	0.1767	0.993753	1.12
Abca1	rs73664376	107679315	A	I61 Intracerebral haemorrhage	-0.00015368	0.50658	0.0371986	0.7901	0.976886	0.914
Abca1	rs13291117	107679425	T	I61 Intracerebral haemorrhage	-5.71e-05	0.71827	0.08249	0.00969	genotyped	0.967
Abca1	rs12336969	107679500	A	I61 Intracerebral haemorrhage	6.34e-05	0.67924	0.0876149	0.6103	0.999272	1.04
Abca1	rs75030337	107679774	G	I61 Intracerebral haemorrhage	6.35e-05	0.67898	0.0876113	0.6103	0.999369	1.04
Abca1	rs140275367	107679904	G	I61 Intracerebral haemorrhage	0.00020644	0.28505	0.0539961	0.1837	0.987581	1.13
Abca1	rs149944280	107679997	G	I61 Intracerebral haemorrhage	6.35e-05	0.6789	0.0876105	0.6029	0.999368	1.04
Abca1	rs79639423	107680113	C	I61 Intracerebral haemorrhage	6.35e-05	0.67912	0.0876099	0.6029	0.999429	1.04
Abca1	rs149075606	107680154	G	I61 Intracerebral haemorrhage	-0.00025319	0.6322	0.00728703	0.6218	0.924466	0.862
Abca1	rs77755871	107680172	G	I61 Intracerebral haemorrhage	6.35e-05	0.6791	0.0876097	0.6029	0.999438	1.04
Abca1	rs73664377	107680307	G	I61 Intracerebral haemorrhage	6.32e-05	0.68023	0.087622	0.6029	0.999373	1.04
Abca1	rs2437811	107680458	T	I61 Intracerebral haemorrhage	0.00015906	0.13015	0.2175	0.8416	genotyped	1.1
Abca1	rs12003756	107680553	G	I61 Intracerebral haemorrhage	-6.39e-05	0.67751	0.08774	0.1043	genotyped	0.963
Abca1	rs10512335	107680639	T	I61 Intracerebral haemorrhage	-0.00015784	0.36001	0.06806	0.08844	genotyped	0.912
Abca1	rs10512336	107680691	C	I61 Intracerebral haemorrhage	6.42e-05	0.67577	0.0875827	0.6178	0.999463	1.04
Abca1	rs10512337	107680730	A	I61 Intracerebral haemorrhage	6.42e-05	0.67562	0.0875869	0.6178	0.999362	1.04
Abca1	rs2515617	107680915	G	I61 Intracerebral haemorrhage	3.5e-05	0.68775	0.454223	0.741	0.99749	1.02
Abca1	rs73664378	107680953	A	I61 Intracerebral haemorrhage	6.49e-05	0.67256	0.0875879	0.6178	0.998492	1.04
Abca1	rs73506147	107681194	C	I61 Intracerebral haemorrhage	0.00015445	0.37067	0.0679291	0.5854	0.99668	1.09
Abca1	rs12347523	107681425	C	I61 Intracerebral haemorrhage	5.17e-05	0.73728	0.0869953	0.839	0.995259	1.03
Abca1	rs7872096	107681614	T	I61 Intracerebral haemorrhage	0.00023658	0.23657	0.0503584	0.2853	0.981136	1.15
Abca1	rs7857983	107681688	C	I61 Intracerebral haemorrhage	-4.32e-06	0.96985	0.177716	0.9766	0.982783	0.997
Abca1	rs12000590	107681693	A	I61 Intracerebral haemorrhage	-0.00018498	0.42917	0.0364459	0.805	0.973345	0.897
Abca1	rs7872225	107681717	A	I61 Intracerebral haemorrhage	0.00022749	0.25478	0.0504915	0.2549	0.979297	1.14
Abca1	rs7861141	107681763	C	I61 Intracerebral haemorrhage	5.51e-05	0.72136	0.0868035	0.847	0.993161	1.03
Abca1	rs67348902	107681973	A	I61 Intracerebral haemorrhage	7.77e-05	0.62266	0.0827035	0.265	0.992116	1.05
Abca1	rs2515616	107681995	G	I61 Intracerebral haemorrhage	0.00016605	0.11496	0.217982	0.8494	0.99176	1.1
Abca1	rs7861459	107682012	G	I61 Intracerebral haemorrhage	0.00021826	0.27291	0.0507891	0.3046	0.980178	1.14
Abca1	rs62568202	107682194	G	I61 Intracerebral haemorrhage	0.00020983	0.15445	0.097028	0.09057	0.98997	1.13
Abca1	rs73664380	107682221	C	I61 Intracerebral haemorrhage	-0.00018811	0.42173	0.036502	0.9409	0.969973	0.896
Abca1	rs72735013	107682377	A	I61 Intracerebral haemorrhage	-0.00037399	0.092469	0.0408439	0.5622	0.967852	0.803
Abca1	rs2791952	107682517	C	I61 Intracerebral haemorrhage	-0.00022259	0.12331	0.100336	0.1318	1	0.878
Abca1	rs6479285	107682885	C	I61 Intracerebral haemorrhage	3.74e-05	0.80849	0.0870412	0.7319	0.990322	1.02
Abca1	rs2472510	107683122	G	I61 Intracerebral haemorrhage	-2.52e-05	0.8012	0.255988	0.4467	0.984217	0.985
Abca1	rs7049195	107683124	A	I61 Intracerebral haemorrhage	3.54e-05	0.81843	0.0871516	0.7481	0.989086	1.02
Abca1	rs78608624	107683172	G	I61 Intracerebral haemorrhage	-0.00016483	0.47744	0.0372319	0.7528	0.969529	0.908
Abca1	rs117881899	107683197	G	I61 Intracerebral haemorrhage	7.73e-05	0.82993	0.0150188	1	0.977742	1.05
Abca1	rs7035693	107683465	G	I61 Intracerebral haemorrhage	3.81e-05	0.80519	0.0870417	0.7238	0.989698	1.02
Abca1	rs12347858	107683524	C	I61 Intracerebral haemorrhage	3.84e-05	0.80379	0.0870417	0.7319	0.989575	1.02
Abca1	rs12342233	107683594	A	I61 Intracerebral haemorrhage	0.00020533	0.304	0.0505542	0.3024	0.978337	1.13
Abca1	rs10512338	107683636	C	I61 Intracerebral haemorrhage	3.9e-05	0.80092	0.0870574	0.74	0.988843	1.02
Abca1	rs2515615	107683692	C	I61 Intracerebral haemorrhage	-0.00022442	0.1213	0.100561	0.1131	0.992159	0.877
Abca1	rs73506160	107683841	T	I61 Intracerebral haemorrhage	4.08e-05	0.79189	0.0870322	0.7158	0.987709	1.02
Abca1	rs2472509	107684230	G	I61 Intracerebral haemorrhage	3.21e-05	0.73069	0.326416	0.7479	0.981113	1.02
Abca1	rs2472508	107684253	A	I61 Intracerebral haemorrhage	-0.0001121	0.29149	0.215865	0.8949	0.98172	0.936
Abca1	rs10991411	107684276	C	I61 Intracerebral haemorrhage	4.34e-05	0.77912	0.0870598	0.7708	0.985781	1.03
Abca1	rs2487049	107684286	G	I61 Intracerebral haemorrhage	-0.00011198	0.29213	0.215836	0.8788	0.980839	0.936
Abca1	rs2515614	107684318	C	I61 Intracerebral haemorrhage	3.01e-05	0.74672	0.327051	0.7687	0.979253	1.02
Abca1	rs10991412	107684405	A	I61 Intracerebral haemorrhage	4.88e-05	0.75295	0.0868527	0.7537	0.984819	1.03
Abca1	rs10991413	107684419	T	I61 Intracerebral haemorrhage	0.00014297	0.32518	0.09919	0.0958	genotyped	1.09
Abca1	rs112872078	107684532	C	I61 Intracerebral haemorrhage	0.00039913	0.20346	0.0209057	0.8581	0.926006	1.26
Abca1	rs12343571	107684626	A	I61 Intracerebral haemorrhage	0.00019707	0.32397	0.0505484	0.452	0.978026	1.12
Abca1	rs73664382	107684848	A	I61 Intracerebral haemorrhage	0.00020559	0.29797	0.0517856	0.3429	0.978241	1.13
Abca1	rs73664384	107684943	C	I61 Intracerebral haemorrhage	0.00021018	0.28744	0.0517498	0.3995	0.978365	1.13
Abca1	rs77386036	107685016	A	I61 Intracerebral haemorrhage	0.00019118	0.334	0.0516332	0.2849	0.977756	1.12
Abca1	rs142234285	107685156	T	I61 Intracerebral haemorrhage	0.00123	0.32611	0.0013994	0.008508	0.92372	2.06
Abca1	rs112555145	107685200	G	I61 Intracerebral haemorrhage	0.00018571	0.34709	0.0518433	0.2804	0.978167	1.11
Abca1	rs139042654	107685279	A	I61 Intracerebral haemorrhage	0.00016503	0.65163	0.0145846	0.4029	0.976031	1.1
Abca1	rs73506168	107685387	A	I61 Intracerebral haemorrhage	0.00035765	0.77689	0.00138791	0.008328	0.940614	1.23
Abca1	rs2516313	107685542	T	I61 Intracerebral haemorrhage	7.72e-06	0.93291	0.342754	0.779	0.990747	1
Abca1	rs60295489	107685568	C	I61 Intracerebral haemorrhage	1.51e-05	0.90917	0.123172	0.8414	0.995276	1.01
Abca1	rs2487050	107685577	A	I61 Intracerebral haemorrhage	-1.69e-05	0.87542	0.203818	0.2683	0.990461	0.99
Abca1	rs10991414	107685589	C	I61 Intracerebral haemorrhage	5.08e-05	0.68639	0.139406	0.5592	0.988147	1.03
Abca1	rs113232777	107686078	C	I61 Intracerebral haemorrhage	-0.00029372	0.32365	0.0222775	0.3821	0.971343	0.842
Abca1	rs2515613	107686131	G	I61 Intracerebral haemorrhage	1.66e-05	0.84935	0.448096	0.4642	0.994159	1.01
Abca1	rs763075087	107686220	A	I61 Intracerebral haemorrhage	-0.0013119	0.20396	0.00184981	0.2993	0.948385	0.464
Abca1	rs2437821	107686241	C	I61 Intracerebral haemorrhage	-2.56e-05	0.81247	0.203907	0.2403	0.993758	0.985
Abca1	rs2487051	107686292	T	I61 Intracerebral haemorrhage	-2.57e-05	0.81169	0.203913	0.2403	0.993891	0.985
Abca1	rs10991415	107686354	A	I61 Intracerebral haemorrhage	-2.48e-05	0.85078	0.1232	0.9745	genotyped	0.986
Abca1	rs2487052	107686405	T	I61 Intracerebral haemorrhage	-2.57e-05	0.81124	0.203897	0.262	0.994234	0.985
Abca1	rs140453328	107686674	A	I61 Intracerebral haemorrhage	2.2e-05	0.94699	0.018918	0.5505	0.921299	1.01
Abca1	rs2515612	107686752	A	I61 Intracerebral haemorrhage	-3.2e-05	0.76652	0.203895	0.2467	0.995327	0.981
Abca1	rs10820747	107686823	A	I61 Intracerebral haemorrhage	5.33e-05	0.60178	0.237615	0.4051	0.995642	1.03
Abca1	rs2437820	107687033	G	I61 Intracerebral haemorrhage	1.78e-05	0.83823	0.441512	0.5611	0.999313	1.01
Abca1	rs2472377	107687104	C	I61 Intracerebral haemorrhage	-2.34e-05	0.78953	0.4397	0.4699	genotyped	0.986
Abca1	rs56042940	107687151	T	I61 Intracerebral haemorrhage	-6e-05	0.66442	0.110692	0.2162	0.993683	0.965
Abca1	rs2472507	107687193	C	I61 Intracerebral haemorrhage	-3.22e-05	0.76521	0.203965	0.251	0.995967	0.981
Abca1	rs55737841	107687261	A	I61 Intracerebral haemorrhage	-5.88e-05	0.67083	0.110619	0.2575	0.993744	0.966
Abca1	rs2487053	107687425	T	I61 Intracerebral haemorrhage	-1.45e-05	0.89204	0.207427	0.2536	0.993171	0.992
Abca1	rs2515611	107687496	A	I61 Intracerebral haemorrhage	-2.97e-05	0.78308	0.203907	0.2823	0.99572	0.983
Abca1	rs10991416	107687698	T	I61 Intracerebral haemorrhage	4.19e-05	0.75155	0.122753	0.6823	0.99651	1.02
Abca1	rs2472506	107687711	T	I61 Intracerebral haemorrhage	-2.8e-05	0.79498	0.203889	0.2753	0.995925	0.984
Abca1	rs2515610	107687906	T	I61 Intracerebral haemorrhage	-2.09e-05	0.84583	0.203895	0.236	0.99645	0.988
Abca1	rs2515609	107688059	A	I61 Intracerebral haemorrhage	-6.01e-05	0.58644	0.189445	0.08392	1	0.965
Abca1	rs10991417	107688629	A	I61 Intracerebral haemorrhage	-3.44e-05	0.69538	0.482	1.51e-06	genotyped	0.98
Abca1	rs62568210	107688717	A	I61 Intracerebral haemorrhage	1.19e-05	0.94599	0.0672987	0.4423	0.962128	1.01
Abca1	rs10991418	107688770	T	I61 Intracerebral haemorrhage	1.5e-05	0.90994	0.122243	0.7904	0.994114	1.01
Abca1	rs62568211	107688892	C	I61 Intracerebral haemorrhage	-0.00015248	0.25936	0.1167	0.3951	genotyped	0.915
Abca1	rs62568212	107689035	T	I61 Intracerebral haemorrhage	0.00016031	0.23679	0.116203	0.4216	0.996661	1.1
Abca1	rs10820749	107689042	A	I61 Intracerebral haemorrhage	3.27e-05	0.70681	0.487315	0.8482	0.995825	1.02
Abca1	rs4742928	107689250	T	I61 Intracerebral haemorrhage	4.44e-05	0.60973	0.482323	0.9809	0.993354	1.03
Abca1	rs12347784	107689289	G	I61 Intracerebral haemorrhage	2.19e-05	0.88067	0.0991103	0.9164	0.986073	1.01
Abca1	rs4742929	107689352	G	I61 Intracerebral haemorrhage	4.08e-05	0.63973	0.482951	0.883	0.992475	1.02
Abca1	rs2472373	107689710	G	I61 Intracerebral haemorrhage	7.8e-06	0.94708	0.165622	0.05654	0.978051	1
Abca1	rs2437817	107690057	A	I61 Intracerebral haemorrhage	-4.92e-05	0.59609	0.330988	0.3142	0.979451	0.972
Abca1	rs2243312	107690124	G	I61 Intracerebral haemorrhage	-4.96e-05	0.5932	0.331053	0.3032	0.979325	0.971
Abca1	rs111292742	107690402	C	I61 Intracerebral haemorrhage	4.24e-05	0.86081	0.0356762	0.7545	0.930397	1.03
Abca1	rs1800977	107690450	A	I61 Intracerebral haemorrhage	-4.55e-05	0.62421	0.33059	0.3138	0.978652	0.974
Abca1	rs2740483	107690535	C	I61 Intracerebral haemorrhage	2.82e-05	0.76233	0.325741	0.3244	0.980971	1.02
Abca1	rs1800976	107690709	G	I61 Intracerebral haemorrhage	-1.27e-05	0.88547	0.445589	0.6286	0.976674	0.993
Abca1	rs2246298	107690733	A	I61 Intracerebral haemorrhage	-4.84e-05	0.65762	0.199678	0.03592	0.979358	0.972
Abca1	rs2246293	107690838	G	I61 Intracerebral haemorrhage	1.13e-05	0.89837	0.449026	0.5805	0.9769	1.01
Abca1	rs2422493	107690995	A	I61 Intracerebral haemorrhage	1.36e-05	0.87732	0.448702	0.6094	0.97695	1.01
Abca1	rs10991419	107691225	T	I61 Intracerebral haemorrhage	1.21e-05	0.93028	0.113332	0.6018	0.978211	1.01
Abca1	rs2980083	107691362	C	I61 Intracerebral haemorrhage	1.07e-05	0.90274	0.465684	0.8627	0.97646	1.01
Abca1	rs72735076	107691523	A	I61 Intracerebral haemorrhage	-2.52e-05	0.84603	0.130675	0.06797	0.976023	0.985
Abca1	rs10991420	107691645	A	I61 Intracerebral haemorrhage	0.00014178	0.29669	0.118257	0.2583	0.975019	1.09
Abca1	rs113447434	107691660	G	I61 Intracerebral haemorrhage	-0.00023127	0.4347	0.0226097	0.7527	0.968542	0.873
Abca1	rs73506198	107691680	T	I61 Intracerebral haemorrhage	3.17e-05	0.83138	0.0953821	0.9761	0.975909	1.02
Abca1	rs2487048	107691823	G	I61 Intracerebral haemorrhage	2.05e-05	0.81594	0.438397	0.9026	0.977325	1.01
Abca1	rs76749395	107691859	G	I61 Intracerebral haemorrhage	-1.9e-05	0.88367	0.130252	0.09301	0.974569	0.989
Abca1	rs2487047	107691934	G	I61 Intracerebral haemorrhage	-5.46e-05	0.60698	0.216864	0.07781	0.97653	0.969
Abca1	rs10124728	107692080	C	I61 Intracerebral haemorrhage	6.54e-05	0.47741	0.344532	0.5295	0.97719	1.04
Abca1	rs2487046	107692229	G	I61 Intracerebral haemorrhage	2.03e-05	0.81776	0.438274	0.9832	0.976208	1.01
Abca1	rs10124755	107692242	C	I61 Intracerebral haemorrhage	5.97e-05	0.51674	0.345293	0.4435	0.97737	1.04
Abca1	rs111404124	107692504	A	I61 Intracerebral haemorrhage	-0.00032206	0.29478	0.0208272	0.7324	0.973431	0.828
Abca1	rs2487044	107692827	T	I61 Intracerebral haemorrhage	-5.14e-05	0.62888	0.215515	0.07325	0.975522	0.97
Abca1	rs10991421	107693140	A	I61 Intracerebral haemorrhage	0.00010095	0.61623	0.0503262	0.8261	0.964877	1.06
Abca1	rs2437812	107693201	C	I61 Intracerebral haemorrhage	3.19e-05	0.71927	0.421511	0.9069	0.975444	1.02
Abca1	rs2437813	107693298	A	I61 Intracerebral haemorrhage	-5.22e-05	0.62382	0.215595	0.06311	0.975322	0.97
Abca1	rs7866586	107693545	A	I61 Intracerebral haemorrhage	0.00010812	0.24146	0.341988	0.683	0.977096	1.07
Abca1	rs10991422	107693931	A	I61 Intracerebral haemorrhage	7.38e-05	0.59356	0.112505	0.3561	0.980292	1.04
Abca1	rs2487043	107693935	A	I61 Intracerebral haemorrhage	-5.04e-05	0.63569	0.215455	0.06158	0.975436	0.971
Abca1	rs142682340	107693975	A	I61 Intracerebral haemorrhage	-0.00038685	0.26089	0.0168452	0.7826	0.947602	0.797
Abca1	rs7021094	107694100	G	I61 Intracerebral haemorrhage	0.00010163	0.27097	0.341621	0.7375	0.977279	1.06
Abca1	rs2994376	107694198	A	I61 Intracerebral haemorrhage	-5.05e-05	0.63501	0.215488	0.05886	0.975564	0.971
Abca1	rs2043664	107694245	G	I61 Intracerebral haemorrhage	6.1e-05	0.52087	0.307837	0.1694	0.977464	1.04
Abca1	rs10991423	107694414	T	I61 Intracerebral haemorrhage	0.00016603	0.30063	0.0799966	0.3426	0.990937	1.1
Abca1	rs2487042	107694522	T	I61 Intracerebral haemorrhage	-5.7e-05	0.59239	0.215445	0.07404	0.975596	0.967
Abca1	rs2472500	107694780	C	I61 Intracerebral haemorrhage	-5.19e-05	0.62556	0.216402	0.06866	0.972729	0.97
Abca1	rs113610227	107694913	G	I61 Intracerebral haemorrhage	9.18e-06	0.95041	0.0978822	0.6011	0.973103	1.01
Abca1	rs2472499	107694924	C	I61 Intracerebral haemorrhage	-5.28e-05	0.61944	0.215802	0.07854	0.975351	0.97
Abca1	rs2472498	107695086	G	I61 Intracerebral haemorrhage	-5.08e-05	0.63275	0.215563	0.07341	0.976249	0.971
Abca1	rs2472496	107695353	A	I61 Intracerebral haemorrhage	6.92e-05	0.43212	0.443969	0.6369	0.977437	1.04
Abca1	rs2472495	107695396	G	I61 Intracerebral haemorrhage	-5.01e-05	0.63734	0.215523	0.06946	0.976801	0.971
Abca1	rs2472494	107695539	C	I61 Intracerebral haemorrhage	6.27e-05	0.47645	0.445591	0.5692	0.977788	1.04
Abca1	rs2472493	107695848	A	I61 Intracerebral haemorrhage	6.49e-05	0.46149	0.443856	0.7246	0.978543	1.04
Abca1	rs56310223	107695882	G	I61 Intracerebral haemorrhage	-0.00018343	0.25157	0.07982	0.482	genotyped	0.898
Abca1	rs2515608	107696463	G	I61 Intracerebral haemorrhage	5.97e-05	0.5288	0.307531	0.1955	0.981118	1.04
Abca1	rs192610805	107696932	A	I61 Intracerebral haemorrhage	0.0003477	0.339	0.0147528	0.1543	0.973964	1.23
Abca1	rs2472492	107697012	C	I61 Intracerebral haemorrhage	9.81e-05	0.26519	0.449092	0.101	0.979845	1.06
Abca1	rs560186951	107697163	T	I61 Intracerebral haemorrhage	-0.0018595	0.11861	0.00143759	0.1243	0.911846	0.336
Abca1	rs2487040	107697946	C	I61 Intracerebral haemorrhage	6.27e-05	0.50714	0.304543	0.1387	0.994305	1.04
Abca1	rs557164689	107697947	G	I61 Intracerebral haemorrhage	-0.00031318	0.70428	0.0030315	0.2442	0.909552	0.832
Abca1	rs12340094	107698056	T	I61 Intracerebral haemorrhage	2.97e-05	0.8333	0.107707	0.4203	0.983244	1.02
Abca1	rs2472491	107698088	A	I61 Intracerebral haemorrhage	0.00013846	0.13174	0.34192	0.008606	0.992329	1.08
Abca1	rs143917601	107698234	A	I61 Intracerebral haemorrhage	-0.00044579	0.14529	0.020604	0.5573	0.9924	0.77
Abca1	rs12553329	107698322	A	I61 Intracerebral haemorrhage	9.82e-05	0.36253	0.205841	0.9079	0.988143	1.06
Abca1	rs2472490	107698327	C	I61 Intracerebral haemorrhage	5.8e-05	0.53945	0.3045	0.1567	0.996377	1.03
Abca1	rs118110117	107698606	A	I61 Intracerebral haemorrhage	0.00059227	0.054142	0.02039	0.7667	genotyped	1.41
Abca1	rs3887137	107698612	T	I61 Intracerebral haemorrhage	7.38e-05	0.59125	0.113221	0.5105	0.988176	1.04
Abca1	rs150802978	107698745	C	I61 Intracerebral haemorrhage	0.0004737	0.20833	0.0137916	0.08848	0.97542	1.32
Abca1	rs4098517	107698783	A	I61 Intracerebral haemorrhage	7.5e-05	0.41255	0.345062	0.9064	0.990452	1.04
Abca1	rs117695407	107699066	G	I61 Intracerebral haemorrhage	-0.00042515	0.16366	0.0206634	0.6156	0.995084	0.779
Abca1	rs2437819	107699196	T	I61 Intracerebral haemorrhage	6.71e-05	0.47704	0.304264	0.1138	1	1.04
Abca1	rs4743765	107699368	A	I61 Intracerebral haemorrhage	7.42e-05	0.58892	0.11323	0.5394	0.989753	1.04
Abca1	rs10123152	107699653	T	I61 Intracerebral haemorrhage	3.38e-05	0.73661	0.252086	0.2994	0.989174	1.02
Abca1	rs35952640	107699686	C	I61 Intracerebral haemorrhage	3.53e-05	0.7767	0.143763	0.08068	0.987107	1.02
Abca1	rs67107507	107699802	T	I61 Intracerebral haemorrhage	-0.00054428	0.10922	0.0168833	0.4283	0.971789	0.727
Abca1	rs77219056	107699885	A	I61 Intracerebral haemorrhage	-0.00042227	0.16764	0.020601	0.5859	0.993975	0.781
Abca1	rs2472482	107699905	A	I61 Intracerebral haemorrhage	6.18e-05	0.51313	0.304241	0.1854	0.998352	1.04
Abca1	rs2487038	107699934	G	I61 Intracerebral haemorrhage	4.91e-05	0.65078	0.199744	0.5183	0.997092	1.03
Abca1	rs146941139	107700249	G	I61 Intracerebral haemorrhage	0.0002793	0.43403	0.0159343	0.1321	0.933957	1.18
Abca1	rs62568213	107700576	T	I61 Intracerebral haemorrhage	7.49e-05	0.5854	0.113236	0.523	0.991085	1.04
Abca1	rs2487036	107700958	A	I61 Intracerebral haemorrhage	-7.33e-05	0.50235	0.2005	0.6363	genotyped	0.958
Abca1	rs7848232	107701183	A	I61 Intracerebral haemorrhage	-0.00049361	0.030641	0.0377982	0.01068	0.982494	0.749
Abca1	rs2487035	107701424	T	I61 Intracerebral haemorrhage	0.00013676	0.13629	0.341849	0.01522	0.993818	1.08
Abca1	rs138168038	107701561	G	I61 Intracerebral haemorrhage	0.00025114	0.48727	0.0148289	0.1141	0.980685	1.16
Abca1	rs146017967	107701615	T	I61 Intracerebral haemorrhage	-0.00043567	0.15223	0.0208933	0.5898	0.991367	0.775
Abca1	rs117423251	107701798	C	I61 Intracerebral haemorrhage	-3.77e-05	0.93098	0.01017	0.9335	genotyped	0.978
Abca1	rs2487034	107701890	T	I61 Intracerebral haemorrhage	5.86e-05	0.53548	0.30386	0.2293	0.99479	1.03
Abca1	rs59691268	107702140	A	I61 Intracerebral haemorrhage	7.2e-05	0.5997	0.113163	0.5056	0.992131	1.04
Abca1	rs2487033	107702151	T	I61 Intracerebral haemorrhage	5.47e-05	0.61376	0.200254	0.4578	0.997793	1.03
Abca1	rs117549101	107703014	T	I61 Intracerebral haemorrhage	-0.00043586	0.15228	0.020897	0.5895	0.99022	0.775
Abca1	rs189967393	107703015	T	I61 Intracerebral haemorrhage	0.00021286	0.59957	0.0118649	0.6621	0.972429	1.13
Abca1	rs181277455	107703016	T	I61 Intracerebral haemorrhage	0.00021007	0.60409	0.0118795	0.6625	0.972648	1.13
Abca1	rs2472480	107703239	C	I61 Intracerebral haemorrhage	6.21e-05	0.56575	0.201158	0.4923	0.998053	1.04
Abca1	rs12006440	107703337	T	I61 Intracerebral haemorrhage	-0.00019017	0.4377	0.0332296	0.8711	0.972661	0.895
Abca1	rs10991428	107703923	A	I61 Intracerebral haemorrhage	3.31e-06	0.97875	0.143603	0.1677	0.989361	1
Abca1	rs2487032	107703934	A	I61 Intracerebral haemorrhage	-2.12e-05	0.80779	0.490216	0.4703	0.992468	0.988
Abca1	rs2487031	107704228	A	I61 Intracerebral haemorrhage	9.84e-05	0.29165	0.320142	0.1025	0.993035	1.06
Abca1	rs10120497	107704419	A	I61 Intracerebral haemorrhage	0.00057295	0.078511	0.0192779	1	0.931403	1.4
Abca1	rs570053739	107704517	T	I61 Intracerebral haemorrhage	-0.0018439	0.11918	0.00142569	0.1337	0.932277	0.339
Abca1	rs186340675	107704567	C	I61 Intracerebral haemorrhage	-0.0015086	0.056473	0.00328975	0.7785	0.914039	0.413
Abca1	rs10121339	107705208	A	I61 Intracerebral haemorrhage	4.27e-05	0.76211	0.107019	0.4255	0.985771	1.03
Abca1	rs117674321	107706118	A	I61 Intracerebral haemorrhage	0.00014685	0.35914	0.0801631	0.8052	0.99252	1.09
Abca1	rs2487030	107706188	C	I61 Intracerebral haemorrhage	-7.45e-05	0.49051	0.2017	0.795	genotyped	0.957
Abca1	rs2472471	107706344	A	I61 Intracerebral haemorrhage	7.17e-05	0.50626	0.201907	0.3794	0.999896	1.04
Abca1	rs4743766	107706815	C	I61 Intracerebral haemorrhage	0.00012709	0.23548	0.208312	0.7949	0.992949	1.08
Abca1	rs4743767	107706841	A	I61 Intracerebral haemorrhage	6.41e-05	0.63974	0.113382	0.486	0.994559	1.04
Abca1	rs4743768	107706913	A	I61 Intracerebral haemorrhage	6.82e-05	0.50976	0.229226	0.5477	0.992349	1.04
Abca1	rs2472469	107706935	C	I61 Intracerebral haemorrhage	0.00014732	0.090873	0.48275	0.05221	0.992692	1.09
Abca1	rs4743769	107707002	G	I61 Intracerebral haemorrhage	0.0001265	0.2376	0.208363	0.7949	0.99281	1.08
Abca1	rs79545149	107707071	G	I61 Intracerebral haemorrhage	-6.77e-05	0.5895	0.14471	0.2648	0.96577	0.961
Abca1	rs2164560	107707353	C	I61 Intracerebral haemorrhage	7.43e-05	0.42966	0.30885	0.6512	0.993689	1.04
Abca1	rs75383657	107707779	C	I61 Intracerebral haemorrhage	-0.00043275	0.15594	0.0208605	0.5605	0.988487	0.776
Abca1	rs7028070	107708024	T	I61 Intracerebral haemorrhage	-0.0005382	0.11359	0.0167637	0.2663	0.97849	0.729
Abca1	rs72735086	107708184	C	I61 Intracerebral haemorrhage	-0.00053552	0.11582	0.0167181	0.2887	0.97597	0.731
Abca1	rs116927382	107708241	T	I61 Intracerebral haemorrhage	-0.00052034	0.09385	0.0200964	0.438	0.988484	0.737
Abca1	rs76258368	107708301	G	I61 Intracerebral haemorrhage	-0.00052124	0.093185	0.0201065	0.4381	0.988546	0.737
Abca1	rs58839960	107708318	A	I61 Intracerebral haemorrhage	2.14e-05	0.87687	0.111488	0.5236	0.995233	1.01
Abca1	rs12344660	107708612	A	I61 Intracerebral haemorrhage	-0.00056156	0.065919	0.0210018	0.5846	0.970614	0.72
Abca1	rs117295193	107708925	C	I61 Intracerebral haemorrhage	-0.0005201	0.093809	0.0201056	0.4639	0.989285	0.737
Abca1	rs62568217	107709190	G	I61 Intracerebral haemorrhage	2.12e-05	0.87845	0.110168	0.3935	0.996023	1.01
Abca1	rs2472459	107710562	T	I61 Intracerebral haemorrhage	7.29e-05	0.49856	0.203143	0.3953	0.995292	1.04
Abca1	rs118046088	107710902	G	I61 Intracerebral haemorrhage	0.00012309	0.44244	0.0800015	0.7068	0.992973	1.07
Abca1	rs143980430	107711679	A	I61 Intracerebral haemorrhage	0.00012271	0.44374	0.0800187	0.7246	0.99321	1.07
Abca1	rs117541165	107711706	T	I61 Intracerebral haemorrhage	0.00012279	0.44346	0.0800153	0.7246	0.993255	1.07
Abca1	rs79453932	107712182	A	I61 Intracerebral haemorrhage	0.00033396	0.31557	0.0176568	0.3993	0.976061	1.22
Abca1	rs2472451	107712209	T	I61 Intracerebral haemorrhage	4.86e-05	0.66171	0.187866	0.3241	0.996107	1.03
Abca1	rs145569002	107712275	C	I61 Intracerebral haemorrhage	0.00012232	0.44516	0.0800434	0.7335	0.993193	1.07
Abca1	rs148863527	107712332	T	I61 Intracerebral haemorrhage	0.00010434	0.91953	0.0018349	1	0.956958	1.06
Abca1	rs2472447	107712707	A	I61 Intracerebral haemorrhage	9.64e-05	0.26984	0.464499	0.08744	0.989808	1.06
Abca1	rs117979522	107713217	G	I61 Intracerebral haemorrhage	0.00012296	0.44278	0.0800218	0.7782	0.993491	1.07
Abca1	rs62568218	107713236	G	I61 Intracerebral haemorrhage	2.39e-05	0.86274	0.110037	0.3886	0.99817	1.01
Abca1	rs1545102	107713645	A	I61 Intracerebral haemorrhage	-4.2e-05	0.73574	0.142454	0.2973	0.992587	0.976
Abca1	rs1811408	107713860	G	I61 Intracerebral haemorrhage	7.4e-05	0.41834	0.348504	0.6704	0.990888	1.04
Abca1	rs144848696	107714667	A	I61 Intracerebral haemorrhage	0.000123	0.44253	0.0800262	0.7426	0.993842	1.07
Abca1	rs184151609	107715108	C	I61 Intracerebral haemorrhage	0.00047333	0.49294	0.00417883	0.6707	0.933058	1.32
Abca1	rs79949216	107715128	C	I61 Intracerebral haemorrhage	-7.61e-06	0.95617	0.11	0.02564	genotyped	0.996
Abca1	rs79279753	107715223	A	I61 Intracerebral haemorrhage	7.42e-05	0.50259	0.190073	0.6928	0.996824	1.04
Abca1	rs2472519	107715878	G	I61 Intracerebral haemorrhage	-6.06e-06	0.95508	0.204985	0.2564	0.992711	0.996
Abca1	rs80329431	107715922	T	I61 Intracerebral haemorrhage	-4.74e-05	0.71744	0.126863	0.5512	0.985898	0.973
Abca1	rs2472518	107716170	A	I61 Intracerebral haemorrhage	4.44e-05	0.68941	0.188137	0.3354	0.993588	1.03
Abca1	rs2472516	107716396	G	I61 Intracerebral haemorrhage	1.98e-05	0.82318	0.400251	0.3562	0.992599	1.01
Abca1	rs12336688	107716864	A	I61 Intracerebral haemorrhage	-4.41e-05	0.73628	0.126844	0.6476	0.985688	0.974
Abca1	rs2472515	107716910	T	I61 Intracerebral haemorrhage	-4.07e-05	0.70261	0.210253	0.2927	0.991295	0.976
Abca1	rs143301928	107716928	T	I61 Intracerebral haemorrhage	-0.00048545	0.15051	0.0169372	0.2288	0.984666	0.752
Abca1	rs62568221	107716934	T	I61 Intracerebral haemorrhage	3.06e-05	0.82718	0.107547	0.4119	0.992734	1.02
Abca1	rs12555462	107717211	A	I61 Intracerebral haemorrhage	3.9e-05	0.78249	0.105664	0.3476	0.995305	1.02
Abca1	rs80242815	107717349	T	I61 Intracerebral haemorrhage	-0.00048598	0.14977	0.0169435	0.2294	0.986099	0.752
Abca1	rs62568222	107717429	T	I61 Intracerebral haemorrhage	0.00037519	0.13948	0.0305302	0.8625	0.982619	1.25
Abca1	rs1890883	107717462	G	I61 Intracerebral haemorrhage	4.18e-05	0.63321	0.445348	0.1183	0.990781	1.02
Abca1	rs1890884	107717481	T	I61 Intracerebral haemorrhage	-4.38e-05	0.68123	0.210467	0.3321	0.990483	0.975
Abca1	rs67071328	107717705	C	I61 Intracerebral haemorrhage	2.03e-05	0.87089	0.1409	0.07876	genotyped	1.01
Abca1	rs117949887	107718076	C	I61 Intracerebral haemorrhage	-0.00012949	0.42117	0.07903	0.3434	genotyped	0.927
Abca1	rs143070276	107718243	T	I61 Intracerebral haemorrhage	-0.00051019	0.10151	0.0200313	0.7268	0.985358	0.742
Abca1	rs2000068	107718308	G	I61 Intracerebral haemorrhage	2.17e-05	0.80723	0.396149	0.4003	0.99077	1.01
Abca1	rs139822703	107718484	C	I61 Intracerebral haemorrhage	0.00036902	0.14634	0.0304987	0.8395	0.982441	1.24
Abca1	rs149235481	107718520	G	I61 Intracerebral haemorrhage	-0.00049267	0.14225	0.0170637	0.2774	0.989509	0.749
Abca1	rs148424010	107718631	A	I61 Intracerebral haemorrhage	-0.00049311	0.14213	0.0170586	0.3009	0.98906	0.749
Abca1	rs113264008	107718818	A	I61 Intracerebral haemorrhage	5.15e-05	0.71603	0.10657	0.5382	0.984634	1.03
Abca1	rs150982102	107718827	G	I61 Intracerebral haemorrhage	-3.73e-05	0.88474	0.0303067	0.6811	0.964529	0.978
Abca1	rs140466256	107718921	A	I61 Intracerebral haemorrhage	-0.00049162	0.14315	0.0170485	0.2775	0.990293	0.75
Abca1	rs34910982	107719241	C	I61 Intracerebral haemorrhage	-0.00062505	0.020595	0.02655	0.5724	genotyped	0.693
Abca1	rs142351363	107719310	T	I61 Intracerebral haemorrhage	-0.00011452	0.72942	0.0191435	0.1742	0.900573	0.935
Abca1	rs2487029	107719444	G	I61 Intracerebral haemorrhage	-8.29e-05	0.43647	0.212675	0.3967	0.985487	0.953
Abca1	rs145785412	107719572	C	I61 Intracerebral haemorrhage	0.00036751	0.14826	0.0304766	0.8392	0.981866	1.24
Abca1	rs62568223	107719762	A	I61 Intracerebral haemorrhage	-0.00060898	0.19911	0.00888626	0.3227	0.946195	0.7
Abca1	rs2472511	107719789	T	I61 Intracerebral haemorrhage	-6.54e-05	0.54205	0.208717	0.3871	0.986062	0.962
Abca1	rs80275229	107719841	G	I61 Intracerebral haemorrhage	5.28e-05	0.71825	0.097937	0.3068	0.991603	1.03
Abca1	rs1561166	107720025	C	I61 Intracerebral haemorrhage	4.2e-05	0.77456	0.0979086	0.2924	0.990787	1.02
Abca1	rs2487028	107720120	C	I61 Intracerebral haemorrhage	-6.39e-05	0.55217	0.209129	0.227	0.979002	0.963
Abca1	rs1561165	107720296	C	I61 Intracerebral haemorrhage	3.92e-05	0.78839	0.0990929	0.2854	0.982714	1.02
Abca1	rs79786055	107720443	T	I61 Intracerebral haemorrhage	0.00017681	0.52423	0.02506	0.1359	genotyped	1.11
Abca1	rs4743770	107720501	A	I61 Intracerebral haemorrhage	-3.72e-05	0.7226	0.223871	0.2547	0.979847	0.978
Abca1	rs72735089	107720914	T	I61 Intracerebral haemorrhage	-0.0001496	0.63818	0.020401	0.6787	0.920242	0.916
Abca1	rs62568224	107721119	T	I61 Intracerebral haemorrhage	0.00038669	0.12536	0.0310074	0.6892	0.980124	1.25
Abca1	rs1125873	107721423	T	I61 Intracerebral haemorrhage	-9.43e-05	0.28049	0.491528	0.4407	0.980914	0.946
Abca1	rs56073355	107721574	A	I61 Intracerebral haemorrhage	0.00016394	0.33524	0.0708305	0.561	0.985307	1.1
Abca1	rs188112587	107721617	T	I61 Intracerebral haemorrhage	-0.0014617	0.065616	0.0032452	0.7786	0.918894	0.425
Abca1	rs4743771	107722282	A	I61 Intracerebral haemorrhage	1.27e-05	0.89441	0.299099	0.7922	0.979899	1.01
Abca1	rs4397467	107722578	G	I61 Intracerebral haemorrhage	6.71e-06	0.94392	0.299247	0.7923	0.980381	1
Abca1	rs1962882	107722735	T	I61 Intracerebral haemorrhage	-1.18e-05	0.89405	0.4197	0.8215	0.981714	0.993
Abca1	rs72735092	107722949	T	I61 Intracerebral haemorrhage	-0.00046344	0.13501	0.0202969	0.7309	0.98178	0.762
Abca1	rs117616307	107723147	T	I61 Intracerebral haemorrhage	-0.00021502	0.44467	0.0245763	0.5957	0.989923	0.882
Abca1	rs141366790	107723647	C	I61 Intracerebral haemorrhage	-0.00026457	0.29573	0.0315048	0.9311	0.960402	0.856
Abca1	rs2009462	107724076	G	I61 Intracerebral haemorrhage	0.00015952	0.34875	0.0708542	0.5872	0.981999	1.1
Abca1	rs2009461	107724088	A	I61 Intracerebral haemorrhage	0.00014775	0.37634	0.0743421	0.7117	0.976208	1.09
Abca1	rs143797786	107724592	C	I61 Intracerebral haemorrhage	4.62e-05	0.84674	0.0349104	0.432	0.974116	1.03
Abca1	rs111936426	107724707	A	I61 Intracerebral haemorrhage	3.81e-05	0.8099	0.082612	0.3347	0.988563	1.02
Abca1	rs141614615	107724814	T	I61 Intracerebral haemorrhage	0.00015846	0.35213	0.0708756	0.5168	0.982524	1.1
Abca1	rs4743772	107724990	T	I61 Intracerebral haemorrhage	8.76e-05	0.35907	0.298115	0.1883	0.98396	1.05
Abca1	rs7025746	107725470	T	I61 Intracerebral haemorrhage	3.37e-05	0.70974	0.368947	0.1848	0.98796	1.02
Abca1	rs528317599	107725564	T	I61 Intracerebral haemorrhage	0.00099813	0.35732	0.00172741	1	0.923274	1.79
Abca1	rs7045067	107725799	G	I61 Intracerebral haemorrhage	8.71e-05	0.36171	0.298041	0.1869	0.984264	1.05
Abca1	rs10991432	107726070	A	I61 Intracerebral haemorrhage	-6.14e-05	0.61385	0.151267	0.4171	0.986763	0.965
Abca1	rs4742930	107726423	G	I61 Intracerebral haemorrhage	2.11e-05	0.80973	0.45196	0.1243	0.988842	1.01
Abca1	rs4742931	107726578	T	I61 Intracerebral haemorrhage	-1.96e-05	0.85572	0.207045	0.3119	0.984499	0.989
Abca1	rs148511355	107726580	T	I61 Intracerebral haemorrhage	0.00015499	0.36257	0.0709581	0.5971	0.982195	1.1
Abca1	rs9919066	107726821	T	I61 Intracerebral haemorrhage	3.85e-05	0.80782	0.082537	0.3951	0.989842	1.02
Abca1	rs13301815	107726869	C	I61 Intracerebral haemorrhage	-3.8e-05	0.73349	0.186481	0.3578	0.992392	0.978
Abca1	rs10991433	107726918	C	I61 Intracerebral haemorrhage	0.00010885	0.44092	0.106944	0.8281	0.984949	1.07
Abca1	rs186650757	107727049	T	I61 Intracerebral haemorrhage	0.00032168	0.24377	0.0264313	0.8948	0.956537	1.21
Abca1	rs4743774	107727443	T	I61 Intracerebral haemorrhage	-5.67e-05	0.58798	0.223084	0.2751	0.985762	0.967
Abca1	rs4743775	107727489	G	I61 Intracerebral haemorrhage	-5.69e-05	0.58661	0.223108	0.2752	0.985799	0.967
Abca1	rs35714044	107727525	G	I61 Intracerebral haemorrhage	-3.77e-05	0.73577	0.186461	0.3819	0.993037	0.978
Abca1	rs4743776	107727727	A	I61 Intracerebral haemorrhage	8.57e-05	0.36905	0.298603	0.1542	0.985041	1.05
Abca1	rs4743777	107727841	C	I61 Intracerebral haemorrhage	-7.15e-05	0.49278	0.225712	0.2132	0.985832	0.959
Abca1	rs75379866	107728373	C	I61 Intracerebral haemorrhage	0.00011759	0.38624	0.116808	0.6399	0.987018	1.07
Abca1	rs72735094	107728424	G	I61 Intracerebral haemorrhage	-0.00041739	0.2319	0.0159952	0.5381	0.971159	0.783
Abca1	rs138765068	107728581	C	I61 Intracerebral haemorrhage	0.00038013	0.1326	0.0307884	0.5868	0.983322	1.25
Abca1	rs7869497	107728889	G	I61 Intracerebral haemorrhage	0.00015667	0.35793	0.0708494	0.6338	0.98125	1.1
Abca1	rs75643536	107729080	G	I61 Intracerebral haemorrhage	-3.95e-05	0.80494	0.08153	0.4456	genotyped	0.977
Abca1	rs7868850	107729125	A	I61 Intracerebral haemorrhage	0.00015639	0.3588	0.0708501	0.6433	0.981276	1.1
Abca1	rs62569476	107729543	A	I61 Intracerebral haemorrhage	0.00037628	0.13687	0.0307443	0.5481	0.983106	1.25
Abca1	rs117270082	107730622	A	I61 Intracerebral haemorrhage	6.06e-05	0.7986	0.0351737	0.5129	0.980219	1.04
Abca1	rs1812096	107730841	T	I61 Intracerebral haemorrhage	2.9e-05	0.80287	0.1717	8.02e-18	genotyped	1.02
Abca1	rs1812095	107730848	T	I61 Intracerebral haemorrhage	-4.33e-05	0.70495	0.174107	0.673	0.999772	0.975
Abca1	rs140004785	107731023	A	I61 Intracerebral haemorrhage	-0.0002294	0.36117	0.0318497	0.3799	0.964372	0.874
Abca1	rs2900388	107731194	T	I61 Intracerebral haemorrhage	0.00010077	0.28899	0.302473	0.1448	0.986233	1.06
Abca1	rs34206781	107731484	C	I61 Intracerebral haemorrhage	-4.25e-05	0.71014	0.174003	0.6904	0.999275	0.975
Abca1	rs76263865	107731519	T	I61 Intracerebral haemorrhage	4.42e-05	0.77946	0.0827863	0.5482	0.994379	1.03
Abca1	rs12380341	107731568	T	I61 Intracerebral haemorrhage	-4.24e-05	0.71109	0.173989	0.6904	0.999506	0.975
Abca1	rs7023634	107731789	A	I61 Intracerebral haemorrhage	0.0001014	0.28598	0.302536	0.1541	0.986181	1.06
Abca1	rs4743778	107732391	T	I61 Intracerebral haemorrhage	3.33e-05	0.70311	0.456567	0.1508	0.991618	1.02
Abca1	rs147772065	107732530	C	I61 Intracerebral haemorrhage	5.98e-05	0.80099	0.0351915	0.5131	0.980478	1.04
Abca1	rs74582225	107732596	C	I61 Intracerebral haemorrhage	0.00035805	0.15683	0.0307467	0.5482	0.983585	1.23
Abca1	rs4524850	107733426	C	I61 Intracerebral haemorrhage	-2.06e-05	0.86174	0.160365	0.7304	0.992893	0.988
Abca1	rs2417589	107733547	C	I61 Intracerebral haemorrhage	-3.99e-06	0.97089	0.195463	0.9177	0.997792	0.998
Abca1	rs139295568	107734578	T	I61 Intracerebral haemorrhage	-0.00066161	0.17606	0.00859512	0.6048	0.919487	0.679
Abca1	rs72735097	107734713	T	I61 Intracerebral haemorrhage	-0.00039226	0.26558	0.0157486	0.2132	0.968269	0.795
Abca1	rs4556142	107734714	G	I61 Intracerebral haemorrhage	5.11e-05	0.57019	0.373407	0.1336	0.994688	1.03
Abca1	rs76958885	107734726	A	I61 Intracerebral haemorrhage	-0.00056043	0.078503	0.0192635	0.44	0.978245	0.72
Abca1	rs4260948	107734804	C	I61 Intracerebral haemorrhage	5.23e-05	0.55062	0.435002	0.09486	0.999464	1.03
Abca1	rs737623	107735105	G	I61 Intracerebral haemorrhage	5.28e-05	0.54645	0.434978	0.09764	0.999614	1.03
Abca1	rs737624	107735318	C	I61 Intracerebral haemorrhage	5.28e-05	0.54648	0.434991	0.09905	0.999601	1.03
Abca1	rs62569477	107735367	T	I61 Intracerebral haemorrhage	0.00034034	0.17773	0.0307498	0.5511	0.986801	1.22
Abca1	rs7046313	107735568	T	I61 Intracerebral haemorrhage	0.00012095	0.36878	0.117677	0.5435	0.996734	1.07
Abca1	rs868370	107735569	G	I61 Intracerebral haemorrhage	5.3e-05	0.54493	0.435015	0.09836	0.999633	1.03
Abca1	rs868369	107735807	A	I61 Intracerebral haemorrhage	6.35e-05	0.48	0.369616	0.809	0.997646	1.04
Abca1	rs10991437	107735920	C	I61 Intracerebral haemorrhage	-0.00013133	0.33063	0.117	0.748	genotyped	0.926
Abca1	rs1808789	107736034	T	I61 Intracerebral haemorrhage	6.34e-05	0.48048	0.369557	0.8062	0.997645	1.04
Abca1	rs4351469	107736145	C	I61 Intracerebral haemorrhage	5.42e-05	0.58526	0.268324	0.4684	0.969191	1.03
Abca1	rs735169	107736318	T	I61 Intracerebral haemorrhage	5.01e-05	0.56894	0.4361	0.000336	genotyped	1.03
Abca1	rs4743780	107736686	G	I61 Intracerebral haemorrhage	5.68e-05	0.51691	0.436085	0.08943	0.997061	1.03
Abca1	rs4743781	107736689	T	I61 Intracerebral haemorrhage	5.68e-05	0.51693	0.436092	0.08943	0.997043	1.03
Abca1	rs5020792	107736706	A	I61 Intracerebral haemorrhage	-4.17e-06	0.9697	0.194529	0.7806	0.99499	0.998
Abca1	rs4743782	107736714	A	I61 Intracerebral haemorrhage	5.64e-05	0.51991	0.435783	0.08947	0.99763	1.03
Abca1	rs62569478	107736900	C	I61 Intracerebral haemorrhage	0.00033595	0.18271	0.0308222	0.5517	0.987598	1.22
Abca1	rs7039455	107737002	G	I61 Intracerebral haemorrhage	5.38e-05	0.53898	0.435205	0.1118	0.999507	1.03
Abca1	rs66503157	107737033	T	I61 Intracerebral haemorrhage	-1.01e-05	0.92681	0.19524	0.8531	0.996699	0.994
Abca1	rs2185414	107737067	G	I61 Intracerebral haemorrhage	5.35e-05	0.54157	0.435161	0.1102	0.999409	1.03
Abca1	rs62569479	107737076	C	I61 Intracerebral haemorrhage	0.00033633	0.18225	0.0308186	0.5902	0.987527	1.22
Abca1	rs118057579	107737243	G	I61 Intracerebral haemorrhage	2.37e-05	0.90814	0.04659	0.5927	genotyped	1.01
Abca1	rs715117	107737342	G	I61 Intracerebral haemorrhage	5.34e-05	0.5424	0.43515	0.1064	0.999456	1.03
Abca1	rs715118	107737358	A	I61 Intracerebral haemorrhage	-1.77e-05	0.92319	0.0608254	0.339	0.980528	0.99
Abca1	rs715119	107737393	T	I61 Intracerebral haemorrhage	-4.43e-05	0.67267	0.219048	0.09625	0.995736	0.974
Abca1	rs79364414	107737478	A	I61 Intracerebral haemorrhage	0.00013185	0.58076	0.0360636	0.593	0.944252	1.08
Abca1	rs2077752	107737710	G	I61 Intracerebral haemorrhage	-1.39e-05	0.93932	0.060983	0.3633	0.981444	0.992
Abca1	rs7026781	107737880	A	I61 Intracerebral haemorrhage	4.95e-05	0.57175	0.435238	0.111	0.99941	1.03
Abca1	rs12379903	107738068	A	I61 Intracerebral haemorrhage	5.41e-05	0.53686	0.435247	0.1149	0.998678	1.03
Abca1	rs12379916	107738081	C	I61 Intracerebral haemorrhage	-1.01e-05	0.92626	0.19525	0.8702	0.995663	0.994
Abca1	rs10123844	107738142	A	I61 Intracerebral haemorrhage	5.39e-05	0.53868	0.435218	0.1125	0.998355	1.03
Abca1	rs113990436	107738270	T	I61 Intracerebral haemorrhage	-1.68e-05	0.92702	0.06077	0.3615	0.979261	0.99
Abca1	rs4373582	107738327	G	I61 Intracerebral haemorrhage	5.4e-05	0.53849	0.435542	0.1273	0.996723	1.03
Abca1	rs4584198	107738340	T	I61 Intracerebral haemorrhage	5.46e-05	0.53374	0.43565	0.1222	0.996489	1.03
Abca1	rs4535794	107738362	G	I61 Intracerebral haemorrhage	5.23e-05	0.55141	0.435039	0.1398	0.995911	1.03
Abca1	rs4584199	107738412	A	I61 Intracerebral haemorrhage	5.66e-05	0.51896	0.43534	0.1318	0.997302	1.03
Abca1	rs4237209	107738648	G	I61 Intracerebral haemorrhage	5.84e-05	0.5058	0.434626	0.1425	0.995594	1.03
Abca1	rs4237210	107738656	C	I61 Intracerebral haemorrhage	5.85e-05	0.5051	0.434622	0.1454	0.995546	1.03
Abca1	rs4237211	107738689	A	I61 Intracerebral haemorrhage	5.74e-05	0.51272	0.435352	0.1336	0.997005	1.03
Abca1	rs34810676	107739043	C	I61 Intracerebral haemorrhage	-5.88e-06	0.95725	0.195244	0.8573	0.994125	0.997
Abca1	rs12686565	107739152	C	I61 Intracerebral haemorrhage	6.42e-05	0.47541	0.36953	0.7976	0.996006	1.04
Abca1	rs113901532	107739191	A	I61 Intracerebral haemorrhage	-1.76e-05	0.9236	0.0609222	0.3087	0.97931	0.99
Abca1	rs12379205	107739312	T	I61 Intracerebral haemorrhage	7.43e-05	0.51601	0.175854	0.74	0.988552	1.04
Abca1	rs13287306	107739681	T	I61 Intracerebral haemorrhage	-0.00073501	0.003577	0.03051	0.8158	genotyped	0.65
Abca1	rs10761089	107740191	A	I61 Intracerebral haemorrhage	0.00010359	0.23627	0.454568	0.237	0.992909	1.06
Abca1	rs10991438	107740287	T	I61 Intracerebral haemorrhage	-1.01e-05	0.92525	0.203282	0.09122	0.99364	0.994
Abca1	rs10761090	107740288	G	I61 Intracerebral haemorrhage	0.00010351	0.23666	0.454565	0.2398	0.992883	1.06
Abca1	rs77258545	107740848	A	I61 Intracerebral haemorrhage	0.00013231	0.32747	0.11698	0.5528	0.995438	1.08
Abca1	rs76945967	107741646	A	I61 Intracerebral haemorrhage	0.00012564	0.34874	0.119192	0.7031	0.994564	1.08
Hexb	rs80037764	73885743	T	I61 Intracerebral haemorrhage	0.00038728	0.15056	0.02666	0.6456	genotyped	1.25
Hexb	rs4146149	73886579	G	I61 Intracerebral haemorrhage	3.37e-05	0.7111	0.354	0.001542	genotyped	1.02
Hexb	rs300245	73886691	A	I61 Intracerebral haemorrhage	-3.53e-05	0.68452	0.489523	0.8267	0.993436	0.98
Hexb	rs300246	73887308	T	I61 Intracerebral haemorrhage	9.76e-05	0.32835	0.252717	0.4715	0.996183	1.06
Hexb	rs76733847	73888150	A	I61 Intracerebral haemorrhage	0.00013229	0.30477	0.131908	0.9048	0.985505	1.08
Hexb	rs300247	73888617	A	I61 Intracerebral haemorrhage	0.0001003	0.31544	0.252048	0.4903	0.997762	1.06
Hexb	rs113406520	73889186	T	I61 Intracerebral haemorrhage	6.24e-05	0.64722	0.117021	0.7588	0.977675	1.04
Hexb	rs76381109	73889204	A	I61 Intracerebral haemorrhage	0.00010799	0.31339	0.208113	0.6366	0.992807	1.07
Hexb	rs56094408	73889249	T	I61 Intracerebral haemorrhage	-2e-05	0.81806	0.499422	0.7685	0.991748	0.988
Hexb	rs10064338	73890439	A	I61 Intracerebral haemorrhage	-0.0004043	0.24135	0.01608	0.8279	genotyped	0.789
Hexb	rs145003453	73890564	T	I61 Intracerebral haemorrhage	-0.0002194	0.54929	0.0154561	0.546	0.912364	0.879
Hexb	rs10075059	73891986	A	I61 Intracerebral haemorrhage	0.00039272	0.27446	0.0151628	0.8158	0.972608	1.26
Hexb	rs4704148	73892030	A	I61 Intracerebral haemorrhage	-8.42e-05	0.78087	0.0215119	0.3812	0.960934	0.952
Hexb	rs300253	73893691	G	I61 Intracerebral haemorrhage	2.55e-05	0.77571	0.384491	0.1135	0.993006	1.02
Hexb	rs13188042	73893913	A	I61 Intracerebral haemorrhage	7.62e-05	0.4894	0.192933	0.8951	0.992378	1.05
Hexb	rs17560266	73894109	C	I61 Intracerebral haemorrhage	0.00010473	0.46649	0.102681	0.3218	0.984412	1.06
Hexb	rs1995262	73894144	T	I61 Intracerebral haemorrhage	0.00011339	0.25271	0.257397	0.3712	1	1.07
Hexb	rs78084119	73894495	G	I61 Intracerebral haemorrhage	-0.0002567	0.65795	0.00598284	0.5733	0.934394	0.86
Hexb	rs300254	73896769	C	I61 Intracerebral haemorrhage	0.00011672	0.24245	0.252454	0.4685	0.996565	1.07
Hexb	rs300255	73896980	C	I61 Intracerebral haemorrhage	0.00011799	0.23756	0.25202	0.4462	0.998139	1.07
Hexb	rs62368178	73897868	T	I61 Intracerebral haemorrhage	-0.0002086	0.34853	0.0416876	0.6802	0.946982	0.885
Hexb	rs10070279	73898568	G	I61 Intracerebral haemorrhage	0.00013307	0.30201	0.131923	0.846	0.985202	1.08
Hexb	rs300256	73898678	A	I61 Intracerebral haemorrhage	2.98e-05	0.73824	0.389571	0.101	0.992157	1.02
Hexb	rs182330491	73898953	T	I61 Intracerebral haemorrhage	0.00018926	0.61444	0.0147438	0.9026	0.913323	1.12
Hexb	rs300257	73899013	C	I61 Intracerebral haemorrhage	0.00011757	0.23607	0.257342	0.3407	0.997939	1.07
Hexb	rs6895845	73899431	A	I61 Intracerebral haemorrhage	0.00013336	0.30098	0.131905	0.8519	0.985165	1.08
Hexb	rs2136874	73899506	A	I61 Intracerebral haemorrhage	-9.2e-05	0.76122	0.021441	0.3797	0.96529	0.947
Hexb	rs115497847	73900170	G	I61 Intracerebral haemorrhage	0.00016379	0.70696	0.0106435	0.7989	0.919945	1.1
Hexb	rs185639993	73901055	C	I61 Intracerebral haemorrhage	0.0010894	0.14358	0.00365431	0.6128	0.920804	1.89
Hexb	rs6866318	73901136	A	I61 Intracerebral haemorrhage	0.00013221	0.30511	0.13201	0.7996	0.984803	1.08
Hexb	rs300264	73902405	T	I61 Intracerebral haemorrhage	0.0001121	0.25909	0.257111	0.3707	0.99605	1.07
Hexb	rs6877353	73902920	A	I61 Intracerebral haemorrhage	0.00013267	0.30337	0.132037	0.8519	0.985109	1.08
Hexb	rs184404812	73903467	T	I61 Intracerebral haemorrhage	1.37e-05	0.98606	0.00324715	0.7816	0.923291	1.01
Hexb	rs17670147	73904734	G	I61 Intracerebral haemorrhage	-6.04e-05	0.65149	0.1199	0.333	genotyped	0.965
Hexb	rs186180	73905556	C	I61 Intracerebral haemorrhage	0.00012943	0.19644	0.251119	0.5039	0.994188	1.08
Hexb	rs300263	73905694	C	I61 Intracerebral haemorrhage	0.00012537	0.22534	0.229534	0.1802	0.990272	1.08
Hexb	rs370180	73906372	C	I61 Intracerebral haemorrhage	0.0001279	0.20204	0.25092	0.4979	0.993719	1.08
Hexb	rs300262	73906706	T	I61 Intracerebral haemorrhage	4e-05	0.6547	0.389204	0.08346	0.989543	1.02
Hexb	rs300261	73907833	A	I61 Intracerebral haemorrhage	0.00011463	0.24864	0.258604	0.3553	0.990967	1.07
Hexb	rs77403492	73908080	G	I61 Intracerebral haemorrhage	0.00011681	0.3653	0.131941	0.8049	0.98333	1.07
Hexb	rs115159593	73909302	T	I61 Intracerebral haemorrhage	-0.000777	0.088357	0.00948474	0.04917	0.95919	0.634
Hexb	rs300243	73910839	C	I61 Intracerebral haemorrhage	6.92e-05	0.44534	0.361903	0.4602	0.98775	1.04
Hexb	rs300244	73911187	A	I61 Intracerebral haemorrhage	1.59e-06	0.98549	0.499685	0.6707	0.98542	1
Hexb	rs10061404	73915696	A	I61 Intracerebral haemorrhage	0.00012505	0.33206	0.132128	0.9761	0.984493	1.08
Hexb	rs114958795	73916698	A	I61 Intracerebral haemorrhage	-0.000542	0.080699	0.0202824	8.46e-36	1	0.728
Hexb	rs115594907	73917129	C	I61 Intracerebral haemorrhage	-0.0001831	0.66833	0.01054	1.78e-16	genotyped	0.898
Hexb	rs7356676	73917301	G	I61 Intracerebral haemorrhage	0.00010619	0.40258	0.137519	0.5868	0.981183	1.06
Hexb	rs10038151	73917527	G	I61 Intracerebral haemorrhage	0.00010824	0.39988	0.132546	0.6335	0.986221	1.07
Hexb	rs72762800	73917833	G	I61 Intracerebral haemorrhage	0.00016374	0.43742	0.04423	0.04073	genotyped	1.1
Hexb	rs10071779	73918344	A	I61 Intracerebral haemorrhage	0.00012039	0.35014	0.131487	0.5447	0.988223	1.07
Hexb	rs10079609	73918616	G	I61 Intracerebral haemorrhage	0.00012124	0.34594	0.132062	0.5168	0.988216	1.07
Hexb	rs77502610	73919448	T	I61 Intracerebral haemorrhage	-1.97e-06	0.99095	0.0696885	0.2343	0.954731	0.999
Hexb	rs71627061	73919977	A	I61 Intracerebral haemorrhage	0.00014725	0.29417	0.108419	0.9293	0.981827	1.09
Hexb	rs300258	73920939	A	I61 Intracerebral haemorrhage	4.4e-05	0.62729	0.362413	0.8763	0.986891	1.03
Hexb	rs77947661	73921574	C	I61 Intracerebral haemorrhage	-0.000101	0.88095	0.00456371	0.169	0.905154	0.943
Hexb	rs535404008	73921648	A	I61 Intracerebral haemorrhage	-0.0006041	0.18717	0.00985225	0.1968	0.914635	0.702
Hexb	rs10942714	73922463	T	I61 Intracerebral haemorrhage	0.00011849	0.35684	0.131958	0.6607	0.989607	1.07
Hexb	rs35547049	73923134	C	I61 Intracerebral haemorrhage	-0.0002217	0.2954	0.04384	0.9034	genotyped	0.878
Hexb	Affx-26952451	73924269	T	I61 Intracerebral haemorrhage	0.00021778	0.41197	0.02742	0.05165	genotyped	1.14
Hexb	rs300260	73924269	T	I61 Intracerebral haemorrhage	0.000217	0.4131	0.027422	0.01546	1	1.14
Hexb	rs10075142	73926984	A	I61 Intracerebral haemorrhage	0.00013869	0.28261	0.130357	0.4617	0.992685	1.08
Hexb	rs536856684	73927080	C	I61 Intracerebral haemorrhage	0.0012885	0.14848	0.0025799	1	0.913615	2.13
Hexb	rs300241	73927280	T	I61 Intracerebral haemorrhage	0.00015723	0.22838	0.1266	0.4091	genotyped	1.1
Hexb	rs35323547	73927750	T	I61 Intracerebral haemorrhage	0.00016036	0.24853	0.110778	0.9653	0.985111	1.1
Hexb	rs1039320	73927752	T	I61 Intracerebral haemorrhage	0.00013544	0.29149	0.132344	0.33	0.988893	1.08
Hexb	rs6886768	73927770	C	I61 Intracerebral haemorrhage	0.00013848	0.28319	0.130406	0.5136	0.993043	1.08
Hexb	rs6867790	73929650	A	I61 Intracerebral haemorrhage	0.00013783	0.28476	0.130611	0.4625	0.994399	1.08
Hexb	rs6453068	73929841	C	I61 Intracerebral haemorrhage	0.0001292	0.31472	0.131287	0.4158	0.997261	1.08
Hexb	rs300240	73930442	T	I61 Intracerebral haemorrhage	2.36e-05	0.79353	0.361339	0.5108	0.999386	1.01
Hexb	rs300239	73930751	T	I61 Intracerebral haemorrhage	2.19e-05	0.80872	0.361174	0.5037	1	1.01
Hexb	Affx-26952524	73930751	T	I61 Intracerebral haemorrhage	2.5e-05	0.78195	0.3616	0.237	genotyped	1.01
Hexb	rs442425	73931246	C	I61 Intracerebral haemorrhage	0.00012768	0.21514	0.230126	0.658	1	1.08
Hexb	rs9176	73932315	C	I61 Intracerebral haemorrhage	2.52e-05	0.77985	0.361051	0.429	0.998508	1.01
Hexb	rs379146	73932534	G	I61 Intracerebral haemorrhage	-4e-05	0.64559	0.4953	0.03268	genotyped	0.977
Hexb	rs7707483	73932763	C	I61 Intracerebral haemorrhage	0.00013276	0.30112	0.131665	0.8757	0.995219	1.08
Hexb	rs34286796	73933174	C	I61 Intracerebral haemorrhage	0.00014953	0.27303	0.115743	0.7181	0.981422	1.09
Hexb	rs1500133	73933628	C	I61 Intracerebral haemorrhage	0.00011837	0.25139	0.229303	0.4199	0.99627	1.07
Hexb	rs1500134	73933978	G	I61 Intracerebral haemorrhage	0.00011404	0.26951	0.228858	0.4652	0.997251	1.07
Hexb	rs3776474	73934131	G	I61 Intracerebral haemorrhage	0.0001135	0.27176	0.228869	0.439	0.997492	1.07
Hexb	rs3822447	73934224	G	I61 Intracerebral haemorrhage	0.00011437	0.26803	0.229083	0.4278	0.995647	1.07
Hexb	rs1500135	73934253	T	I61 Intracerebral haemorrhage	0.00011431	0.2683	0.22909	0.4193	0.995506	1.07
Hexb	rs10474420	73934274	G	I61 Intracerebral haemorrhage	0.00013105	0.3075	0.131699	0.911	0.994272	1.08
Hexb	rs77891905	73934755	A	I61 Intracerebral haemorrhage	0.00054505	0.14012	0.01405	0.2424	genotyped	1.38
Hexb	rs970237	73934926	T	I61 Intracerebral haemorrhage	0.00010889	0.29188	0.228719	0.3942	0.997096	1.07
Hexb	rs3776477	73935330	G	I61 Intracerebral haemorrhage	0.00014062	0.27623	0.140226	0.4926	0.931604	1.09
Hexb	rs3776478	73935354	A	I61 Intracerebral haemorrhage	0.00011225	0.27693	0.229311	0.4139	0.994924	1.07
Hexb	rs3776479	73935406	C	I61 Intracerebral haemorrhage	0.0001081	0.29598	0.228135	0.4122	0.995014	1.07
Hexb	rs1039321	73937506	A	I61 Intracerebral haemorrhage	6.96e-05	0.50261	0.2278	0.01382	genotyped	1.04
Hexb	rs7734383	73937854	T	I61 Intracerebral haemorrhage	0.00011624	0.36581	0.131489	0.8695	0.993363	1.07
Hexb	rs114739423	73938259	G	I61 Intracerebral haemorrhage	0.0001124	0.5727	0.05012	0.09647	genotyped	1.07
Hexb	rs1500136	73938452	A	I61 Intracerebral haemorrhage	-4.3e-05	0.89254	0.0198953	0.8184	0.947045	0.975
Hexb	rs16872141	73939265	C	I61 Intracerebral haemorrhage	0.00010824	0.39816	0.132662	0.8938	0.992277	1.07
Hexb	rs72764605	73940299	T	I61 Intracerebral haemorrhage	0.00012203	0.33755	0.147179	0.8394	0.919698	1.07
Hexb	rs7721318	73940430	T	I61 Intracerebral haemorrhage	9.75e-05	0.34806	0.225872	0.2849	0.994653	1.06
Hexb	rs10070403	73942502	T	I61 Intracerebral haemorrhage	0.0001146	0.37379	0.130665	0.8692	0.994242	1.07
Hexb	rs73113473	73942728	A	I61 Intracerebral haemorrhage	0.00011377	0.37712	0.130735	0.8166	0.994671	1.07
Hexb	rs73113474	73942900	G	I61 Intracerebral haemorrhage	0.00011154	0.38604	0.130944	0.9167	0.997084	1.07
Hexb	rs10474421	73943257	C	I61 Intracerebral haemorrhage	0.00011222	0.38314	0.130923	0.9226	0.997544	1.07
Hexb	rs10474422	73943353	C	I61 Intracerebral haemorrhage	0.0001121	0.38366	0.130887	0.8989	0.997715	1.07
Hexb	rs10473968	73943431	G	I61 Intracerebral haemorrhage	6.31e-05	0.64576	0.114704	0.5733	0.98051	1.04
Hexb	rs7700314	73943841	G	I61 Intracerebral haemorrhage	0.00011174	0.3851	0.130934	0.8694	0.99774	1.07
Hexb	rs7704467	73944109	G	I61 Intracerebral haemorrhage	4.37e-05	0.63176	0.351385	0.5462	0.98859	1.03
Hexb	rs6453069	73944177	G	I61 Intracerebral haemorrhage	0.00024326	0.30831	0.0355257	0.03428	0.953722	1.15
Hexb	rs6453070	73944217	T	I61 Intracerebral haemorrhage	0.0001103	0.39108	0.130937	0.9108	0.999238	1.07
Hexb	rs1500132	73944296	C	I61 Intracerebral haemorrhage	0.0001303	0.21509	0.220321	0.3339	0.986764	1.08
Hexb	rs112079675	73944316	T	I61 Intracerebral haemorrhage	0.00013998	0.53405	0.03871	0.8723	genotyped	1.09
Hexb	rs141867747	73944418	T	I61 Intracerebral haemorrhage	0.00046705	0.21439	0.0146462	0.4153	0.914387	1.31
Hexb	rs6864196	73944444	A	I61 Intracerebral haemorrhage	-0.0001178	0.36107	0.1309	0.111	genotyped	0.933
Hexb	rs62368182	73944814	C	I61 Intracerebral haemorrhage	0.00026035	0.13263	0.06772	0.5631	genotyped	1.16
Hexb	rs9942348	73944997	A	I61 Intracerebral haemorrhage	0.00011839	0.35928	0.129935	0.982	0.995624	1.07
Hexb	rs4704149	73945185	C	I61 Intracerebral haemorrhage	0.00013252	0.2077	0.220493	0.4168	0.984585	1.08
Hexb	rs6869778	73945433	G	I61 Intracerebral haemorrhage	0.00011944	0.35533	0.129861	0.976	0.995615	1.07
Hexb	rs6874600	73945738	A	I61 Intracerebral haemorrhage	0.00012156	0.34759	0.12976	0.994	0.992053	1.07
Hexb	rs2173673	73946098	A	I61 Intracerebral haemorrhage	9.38e-05	0.36654	0.230517	0.4017	0.97861	1.06
Hexb	rs142687721	73946486	G	I61 Intracerebral haemorrhage	0.00015664	0.24179	0.123063	0.5942	0.970678	1.1
Hexb	rs146020626	73946488	G	I61 Intracerebral haemorrhage	0.00014212	0.28844	0.122904	0.4786	0.970956	1.09
Hexb	rs9942341	73947164	C	I61 Intracerebral haemorrhage	0.00011861	0.2507	0.239092	0.4794	0.9645	1.07
Hexb	rs56951927	73947192	G	I61 Intracerebral haemorrhage	9.29e-05	0.49171	0.121646	0.2156	0.962405	1.06
Hexb	rs60248850	73947263	C	I61 Intracerebral haemorrhage	9.31e-05	0.49313	0.120513	0.1045	0.959519	1.06
Hexb	rs34931997	73947363	C	I61 Intracerebral haemorrhage	5.44e-05	0.54847	0.3589	0.04926	genotyped	1.03
Hexb	rs13173835	73947591	G	I61 Intracerebral haemorrhage	6.81e-05	0.46387	0.371682	0.09422	0.925011	1.04
Hexb	rs6896412	73947979	T	I61 Intracerebral haemorrhage	8.35e-05	0.33617	0.4869	0.5844	genotyped	1.05
Hexb	rs6874691	73948251	G	I61 Intracerebral haemorrhage	3.2e-05	0.84726	0.07328	0.08213	genotyped	1.02
Hexb	rs10058135	73949009	A	I61 Intracerebral haemorrhage	0.00031342	0.044029	0.08506	0.5961	genotyped	1.2
Hexb	rs4704150	73949258	G	I61 Intracerebral haemorrhage	-0.0001372	0.19832	0.222471	0.2583	0.95581	0.923
Hexb	rs10073786	73949268	T	I61 Intracerebral haemorrhage	0.00015721	0.079981	0.441327	0.6465	0.942163	1.1
Hexb	rs34692858	73949449	C	I61 Intracerebral haemorrhage	0.00011723	0.26615	0.228413	0.3905	0.955466	1.07
Hexb	rs59854202	73949560	T	I61 Intracerebral haemorrhage	-0.0001386	0.18589	0.232754	0.1533	0.959192	0.922
Hexb	rs59181501	73949824	G	I61 Intracerebral haemorrhage	-0.0001422	0.17258	0.234206	0.2573	0.964865	0.92
Hexb	rs13173785	73949860	A	I61 Intracerebral haemorrhage	0.00015286	0.083719	0.496388	0.9207	0.960821	1.09
Hexb	rs4704151	73949876	A	I61 Intracerebral haemorrhage	-0.0001421	0.17302	0.233864	0.295	0.964222	0.92
Hexb	rs59496823	73950313	T	I61 Intracerebral haemorrhage	-9.85e-05	0.35392	0.22288	0.4494	0.960422	0.944
Hexb	rs115331871	73950427	C	I61 Intracerebral haemorrhage	-0.0003006	0.39103	0.01552	0.1923	genotyped	0.838
Hexb	rs72764607	73950503	C	I61 Intracerebral haemorrhage	-1.8e-05	0.90821	0.08433	0.5995	genotyped	0.989
Hexb	rs60141674	73950640	A	I61 Intracerebral haemorrhage	-0.0001527	0.14024	0.234847	0.3293	0.975914	0.914
Hexb	rs4397112	73950658	C	I61 Intracerebral haemorrhage	-0.0001517	0.14281	0.23477	0.3585	0.97601	0.915
Hexb	rs904713	73950693	T	I61 Intracerebral haemorrhage	-0.0001037	0.33157	0.217255	0.7312	0.970263	0.941
Hexb	rs904714	73950760	T	I61 Intracerebral haemorrhage	-0.0001506	0.14567	0.234278	0.3681	0.979487	0.916
Hexb	rs4704153	73951233	C	I61 Intracerebral haemorrhage	-0.0001536	0.13663	0.234607	0.2886	0.985158	0.914
Hexb	rs4704154	73951269	C	I61 Intracerebral haemorrhage	-0.000154	0.1356	0.23466	0.28	0.985372	0.914
Hexb	rs4703637	73951467	A	I61 Intracerebral haemorrhage	-0.0001502	0.14722	0.229256	0.3778	0.993561	0.916
Hexb	rs904715	73951621	G	I61 Intracerebral haemorrhage	0.00015597	0.074639	0.497155	0.8856	0.981814	1.1
Hexb	rs4703638	73951733	G	I61 Intracerebral haemorrhage	0.00011461	0.27367	0.22785	0.5065	0.971036	1.07
Hexb	rs4703639	73951763	G	I61 Intracerebral haemorrhage	0.00011303	0.28056	0.227692	0.4457	0.970835	1.07
Hexb	rs2314754	73952002	C	I61 Intracerebral haemorrhage	0.00015004	0.14827	0.2279	0.01847	genotyped	1.09
Hexb	rs112310655	73952606	T	I61 Intracerebral haemorrhage	-0.0001476	0.15143	0.234065	0.2666	0.990134	0.917
Hexb	rs67223559	73952765	G	I61 Intracerebral haemorrhage	-0.0001509	0.14286	0.233328	0.2702	0.993692	0.915
Hexb	rs10942715	73952804	C	I61 Intracerebral haemorrhage	0.00014782	0.091405	0.473946	0.7728	0.983187	1.09
Hexb	rs12152861	73954619	T	I61 Intracerebral haemorrhage	0.00015882	0.068017	0.483029	0.7374	0.994142	1.1
Hexb	rs13187309	73954752	C	I61 Intracerebral haemorrhage	0.00015974	0.066283	0.476762	0.9536	0.993574	1.1
Hexb	rs16872154	73955280	T	I61 Intracerebral haemorrhage	-0.0001481	0.1532	0.227388	0.462	0.996829	0.917
Hexb	rs10071175	73955466	C	I61 Intracerebral haemorrhage	0.00014932	0.085854	0.491963	0.9401	0.995331	1.09
Hexb	rs904717	73955773	A	I61 Intracerebral haemorrhage	0.00015712	0.071702	0.4783	0.0133	genotyped	1.1
Hexb	rs16872160	73956787	C	I61 Intracerebral haemorrhage	-0.0001542	0.1378	0.226844	0.4671	0.99308	0.914
Hexb	rs57938943	73956940	T	I61 Intracerebral haemorrhage	-0.0001538	0.13912	0.226744	0.4094	0.991532	0.914
Hexb	rs10041731	73957141	G	I61 Intracerebral haemorrhage	0.00016273	0.061832	0.475275	0.9945	0.989869	1.1
Hexb	rs76087647	73957624	G	I61 Intracerebral haemorrhage	0.0001548	0.66604	0.0152617	1	0.960215	1.09
Hexb	rs1550906	73957666	C	I61 Intracerebral haemorrhage	5.19e-05	0.59909	0.2631	0.01779	genotyped	1.03
Hexb	rs1006281	73957675	A	I61 Intracerebral haemorrhage	-0.0001624	0.11928	0.226796	0.6481	0.985729	0.909
Hexb	rs75647837	73957966	A	I61 Intracerebral haemorrhage	0.00013735	0.7068	0.0147686	1	0.966441	1.08
Hexb	rs1696980	73958057	C	I61 Intracerebral haemorrhage	0.00025482	0.10633	0.0859443	0.7711	0.956056	1.16
Hexb	rs4704156	73958206	C	I61 Intracerebral haemorrhage	4.55e-05	0.64704	0.265979	0.03315	0.9734	1.03
Hexb	rs4703640	73958245	C	I61 Intracerebral haemorrhage	3.63e-05	0.71486	0.265875	0.03097	0.972236	1.02
Hexb	rs58047404	73958796	G	I61 Intracerebral haemorrhage	-5.71e-05	0.54443	0.338705	0.4623	0.94378	0.967
Hexb	rs77368290	73958938	G	I61 Intracerebral haemorrhage	0.00011703	0.6762	0.02457	0.8875	genotyped	1.07
Hexb	rs1696982	73959258	T	I61 Intracerebral haemorrhage	-0.0001356	0.16004	0.294554	0.5681	0.97133	0.924
Hexb	rs1665890	73959259	G	I61 Intracerebral haemorrhage	-0.000193	0.033249	0.384459	0.3047	0.964262	0.893
Hexb	rs2454846	73959526	A	I61 Intracerebral haemorrhage	0.0001264	0.18655	0.2914	0.1397	genotyped	1.08
Hexb	rs2454847	73959632	T	I61 Intracerebral haemorrhage	-0.0001171	0.25034	0.243889	0.9741	0.980826	0.934
Hexb	rs58501222	73959773	A	I61 Intracerebral haemorrhage	-0.0001283	0.18	0.289875	0.8233	0.997018	0.928
Hexb	rs13185892	73960044	G	I61 Intracerebral haemorrhage	-0.0001273	0.18357	0.289861	0.8298	0.996968	0.928
Hexb	rs13190137	73960142	C	I61 Intracerebral haemorrhage	-0.0001314	0.16963	0.289721	0.8459	0.99683	0.926
Hexb	rs820861	73960192	G	I61 Intracerebral haemorrhage	-0.0001316	0.16907	0.289758	0.8427	0.996833	0.926
Hexb	rs820860	73960308	T	I61 Intracerebral haemorrhage	-0.0001951	0.026782	0.4156	0.3848	genotyped	0.892
Hexb	rs820859	73960498	G	I61 Intracerebral haemorrhage	-0.0001316	0.169	0.28978	0.8298	0.99679	0.926
Hexb	rs820858	73960725	T	I61 Intracerebral haemorrhage	-0.0001258	0.18861	0.289665	0.8105	0.996895	0.929
Hexb	rs7700832	73960835	C	I61 Intracerebral haemorrhage	-9.22e-05	0.33362	0.294283	0.8367	0.993989	0.947
Hexb	rs820857	73960992	C	I61 Intracerebral haemorrhage	-0.0001249	0.19198	0.289914	0.8622	0.995116	0.929
Hexb	rs766318	73961293	G	I61 Intracerebral haemorrhage	-9.61e-05	0.3139	0.294225	0.8399	0.993897	0.945
Hexb	rs820856	73961609	C	I61 Intracerebral haemorrhage	-0.0001172	0.21865	0.294861	0.7125	0.995258	0.934
Hexb	rs820855	73961704	T	I61 Intracerebral haemorrhage	-0.0001245	0.19334	0.289831	0.8654	0.995744	0.93
Hexb	rs820854	73962485	A	I61 Intracerebral haemorrhage	-0.0001207	0.20807	0.289202	0.9011	0.994275	0.932
Hexb	rs820853	73962506	T	I61 Intracerebral haemorrhage	-0.0001917	0.02946	0.416084	0.164	0.993918	0.894
Hexb	rs860245	73962955	G	I61 Intracerebral haemorrhage	-0.0001128	0.23749	0.294236	0.749	0.992457	0.936
Hexb	rs820852	73963011	G	I61 Intracerebral haemorrhage	-0.0001876	0.033319	0.414231	0.1998	0.994859	0.896
Hexb	rs820851	73963152	A	I61 Intracerebral haemorrhage	-0.0001113	0.24353	0.29417	0.7677	0.992289	0.937
Hexb	rs115601208	73963492	T	I61 Intracerebral haemorrhage	1.11e-05	0.94827	0.0761941	0.7594	0.914712	1.01
Hexb	rs820850	73963502	G	I61 Intracerebral haemorrhage	-0.0001085	0.25604	0.294119	0.8664	0.992209	0.938
Hexb	rs11958029	73964118	T	I61 Intracerebral haemorrhage	0.00011423	0.22903	0.3008	0.2004	genotyped	1.07
Hexb	rs11960249	73964119	A	I61 Intracerebral haemorrhage	-0.0001037	0.27808	0.291543	0.593	0.998216	0.941
Hexb	rs820849	73964517	T	I61 Intracerebral haemorrhage	-7.47e-05	0.55114	0.150994	0.8742	0.929787	0.957
Hexb	rs17560807	73964600	T	I61 Intracerebral haemorrhage	-0.0001895	0.31111	0.05695	0.5198	genotyped	0.895
Hexb	rs820848	73964660	G	I61 Intracerebral haemorrhage	-0.0001131	0.23698	0.294238	0.9803	0.988813	0.936
Hexb	rs820847	73964845	G	I61 Intracerebral haemorrhage	-0.0001816	0.042318	0.412759	0.1993	0.965498	0.899
Hexb	rs72764621	73966739	C	I61 Intracerebral haemorrhage	-0.0002226	0.47119	0.02013	0.73	genotyped	0.878
Hexb	rs6453072	73966901	A	I61 Intracerebral haemorrhage	-2.83e-05	0.745	0.4573	0.6522	genotyped	0.984
Hexb	rs820844	73967964	T	I61 Intracerebral haemorrhage	-2.08e-05	0.82146	0.415198	0.0924	0.907079	0.988
Hexb	rs820843	73968469	T	I61 Intracerebral haemorrhage	-6.53e-05	0.52566	0.253588	0.5023	0.934884	0.962
Hexb	rs11747100	73968934	C	I61 Intracerebral haemorrhage	-1.7e-05	0.87865	0.189366	0.8242	0.989924	0.99
Hexb	rs16872173	73969058	C	I61 Intracerebral haemorrhage	-0.0001835	0.16982	0.129347	0.5569	0.927079	0.898
Hexb	rs820842	73969376	A	I61 Intracerebral haemorrhage	2.23e-05	0.80438	0.422252	0.0177	0.947331	1.01
Hexb	rs11747317	73969653	A	I61 Intracerebral haemorrhage	1.24e-05	0.91087	0.1903	0.4283	genotyped	1.01
Hexb	rs79228497	73970106	A	I61 Intracerebral haemorrhage	3.72e-05	0.74291	0.179136	0.306	0.991441	1.02
Hexb	rs140728376	73970164	G	I61 Intracerebral haemorrhage	-8.99e-05	0.54605	0.100332	0.427	0.934017	0.949
Hexb	rs820841	73970597	T	I61 Intracerebral haemorrhage	-5.65e-05	0.52311	0.452874	0.2839	0.963656	0.967
Hexb	rs10515187	73970757	G	I61 Intracerebral haemorrhage	-1.8e-06	0.98692	0.194129	0.9738	0.993472	0.999
Hexb	rs11748221	73970816	C	I61 Intracerebral haemorrhage	5.06e-05	0.65572	0.178876	0.2859	0.991039	1.03
Hexb	rs820840	73971107	G	I61 Intracerebral haemorrhage	4.53e-05	0.61674	0.395921	0.3125	0.956939	1.03
Hexb	rs11749103	73971777	G	I61 Intracerebral haemorrhage	7.37e-05	0.57545	0.126592	0.9875	0.97947	1.04
Hexb	rs820862	73972457	A	I61 Intracerebral haemorrhage	-7.12e-05	0.42004	0.447992	0.2308	0.970738	0.959
Hexb	rs11750605	73972463	C	I61 Intracerebral haemorrhage	6.43e-05	0.57105	0.178927	0.1381	0.991553	1.04
Hexb	rs11750634	73972539	C	I61 Intracerebral haemorrhage	6.1e-05	0.5907	0.179156	0.1386	0.99158	1.04
Hexb	rs820863	73972734	T	I61 Intracerebral haemorrhage	-6.85e-05	0.43787	0.447334	0.2377	0.972356	0.961
Hexb	rs59650752	73972900	C	I61 Intracerebral haemorrhage	5.96e-06	0.96572	0.11095	0.4598	0.987459	1
Hexb	rs11738373	73972925	C	I61 Intracerebral haemorrhage	6.63e-05	0.55925	0.178906	0.1799	0.991765	1.04
Hexb	rs11738401	73972991	C	I61 Intracerebral haemorrhage	6.71e-05	0.5549	0.178859	0.1705	0.991673	1.04
Hexb	rs11750747	73973220	G	I61 Intracerebral haemorrhage	6.75e-05	0.55226	0.178896	0.1856	0.992043	1.04
Hexb	rs820864	73973359	C	I61 Intracerebral haemorrhage	-7.44e-05	0.46246	0.252091	0.9602	0.97014	0.957
Hexb	rs3894712	73973651	A	I61 Intracerebral haemorrhage	6.91e-05	0.54266	0.178911	0.1896	0.992523	1.04
Hexb	rs7445920	73973825	T	I61 Intracerebral haemorrhage	2.64e-05	0.81018	0.194388	0.9913	0.991507	1.02
Hexb	rs10942716	73973951	A	I61 Intracerebral haemorrhage	7.04e-05	0.5352	0.178911	0.1935	0.992546	1.04
Hexb	rs112771415	73974174	G	I61 Intracerebral haemorrhage	-0.0003895	0.2746	0.0152994	0.9074	0.974023	0.796
Hexb	rs10942717	73974275	G	I61 Intracerebral haemorrhage	7.18e-05	0.52676	0.178862	0.1934	0.993151	1.04
Hexb	rs11748460	73974487	C	I61 Intracerebral haemorrhage	-0.0001493	0.38747	0.06799	0.04496	genotyped	0.916
Hexb	rs11738782	73974564	G	I61 Intracerebral haemorrhage	6.46e-05	0.56919	0.178901	0.2167	0.993125	1.04
Hexb	rs11738805	73974568	T	I61 Intracerebral haemorrhage	5.4e-05	0.63434	0.178486	0.1996	0.995804	1.03
Hexb	rs59514206	73974847	G	I61 Intracerebral haemorrhage	6.98e-05	0.53811	0.17917	0.2244	0.993482	1.04
Hexb	rs12233980	73975094	A	I61 Intracerebral haemorrhage	7.21e-05	0.52518	0.179026	0.2028	0.993447	1.04
Hexb	rs12233981	73975140	A	I61 Intracerebral haemorrhage	7.22e-05	0.52444	0.179026	0.207	0.993452	1.04
Hexb	rs139198275	73975417	A	I61 Intracerebral haemorrhage	-0.0003645	0.39337	0.010975	0.6273	0.93871	0.808
Hexb	rs111335315	73975557	G	I61 Intracerebral haemorrhage	3.12e-05	0.77621	0.19435	0.9564	0.992616	1.02
Hexb	rs79129220	73975587	T	I61 Intracerebral haemorrhage	2.96e-05	0.78732	0.194538	0.9608	0.991141	1.02
Hexb	rs80186841	73975815	G	I61 Intracerebral haemorrhage	6.85e-05	0.54594	0.178957	0.1924	0.994217	1.04
Hexb	rs16872194	73975830	T	I61 Intracerebral haemorrhage	-0.0003986	0.26229	0.0153306	0.9076	0.97707	0.792
Hexb	rs77367159	73976883	T	I61 Intracerebral haemorrhage	2.49e-05	0.82068	0.193688	0.8139	0.99567	1.01
Hexb	rs148275294	73977007	A	I61 Intracerebral haemorrhage	0.00040336	0.31864	0.0121374	0.4233	0.955124	1.27
Hexb	rs6898989	73977173	A	I61 Intracerebral haemorrhage	5.76e-05	0.61148	0.178693	0.1445	0.998281	1.03
Hexb	rs4460123	73977524	G	I61 Intracerebral haemorrhage	-2.77e-05	0.80908	0.1745	1.59e-05	genotyped	0.984
Hexb	rs17670514	73977645	C	I61 Intracerebral haemorrhage	5.21e-05	0.64768	0.175339	0.319	0.999536	1.03
Hexb	rs6896615	73978221	G	I61 Intracerebral haemorrhage	-7.04e-05	0.42234	0.4321	0.4651	0.992044	0.96
Hexb	rs820866	73978701	A	I61 Intracerebral haemorrhage	-7.06e-05	0.42078	0.432174	0.4652	0.993591	0.959
Hexb	rs820867	73979130	C	I61 Intracerebral haemorrhage	-7.67e-05	0.38228	0.426811	0.4223	0.99452	0.956
Hexb	rs820868	73979807	G	I61 Intracerebral haemorrhage	-7.19e-05	0.41123	0.43207	0.3407	0.998237	0.959
Hexb	rs820869	73980065	T	I61 Intracerebral haemorrhage	-7.27e-05	0.40562	0.431957	0.3753	0.999628	0.958
Hexb	rs820870	73980111	T	I61 Intracerebral haemorrhage	-6.55e-05	0.45551	0.4335	0.3581	genotyped	0.962
Hexb	rs16872198	73980182	G	I61 Intracerebral haemorrhage	5.89e-05	0.60602	0.174822	0.8315	0.999205	1.04
Hexb	rs820871	73980197	C	I61 Intracerebral haemorrhage	-4.94e-05	0.61863	0.257137	0.589	0.999133	0.971
Hexb	rs820872	73980214	T	I61 Intracerebral haemorrhage	-7.3e-05	0.4041	0.431939	0.366	0.999446	0.958
Hexb	rs820874	73980621	C	I61 Intracerebral haemorrhage	-7.27e-05	0.40569	0.432005	0.2873	0.999331	0.958
Hexb	rs2936918	73980799	C	I61 Intracerebral haemorrhage	-7.16e-05	0.41293	0.431965	0.2904	0.999206	0.959
Hexb	rs820878	73981270	C	I61 Intracerebral haemorrhage	-2.27e-05	0.91227	0.04655	0.009557	genotyped	0.987
Hexb	rs147155126	73981299	C	I61 Intracerebral haemorrhage	-0.0003757	0.3439	0.01208	0.7197	genotyped	0.802
Hexb	rs820879	73981662	A	I61 Intracerebral haemorrhage	-5.28e-05	0.59521	0.2574	0.8161	genotyped	0.97
Hexb	rs820880	73982325	A	I61 Intracerebral haemorrhage	-4.95e-05	0.6176	0.256943	0.4163	0.99909	0.971
Hexb	rs820881	73982349	A	I61 Intracerebral haemorrhage	-4.93e-05	0.61929	0.257129	0.4504	0.998519	0.972
Hexb	rs820882	73982692	C	I61 Intracerebral haemorrhage	-5.01e-05	0.61367	0.256966	0.4161	0.998972	0.971
Hexb	rs3776481	73982695	C	I61 Intracerebral haemorrhage	6.25e-05	0.58401	0.174699	0.8405	0.998354	1.04
Hexb	rs820883	73982789	A	I61 Intracerebral haemorrhage	-4.92e-05	0.61985	0.257059	0.461	0.998812	0.972
Hexb	rs820884	73982965	C	I61 Intracerebral haemorrhage	-5.1e-05	0.60733	0.256832	0.4526	0.998807	0.971
Hexb	rs820885	73983049	G	I61 Intracerebral haemorrhage	-4.94e-05	0.6183	0.257001	0.4394	0.998783	0.971
Hexb	rs820886	73984188	A	I61 Intracerebral haemorrhage	-4.72e-05	0.63453	0.257074	0.4637	0.998529	0.973
Hexb	rs820887	73984246	G	I61 Intracerebral haemorrhage	-4.72e-05	0.63425	0.257048	0.4556	0.998637	0.973
Hexb	rs820888	73984264	A	I61 Intracerebral haemorrhage	-4.73e-05	0.63371	0.257006	0.483	0.998253	0.973
Hexb	rs113242388	73984414	T	I61 Intracerebral haemorrhage	0.00010964	0.55005	0.0599238	0.3665	0.991168	1.07
Hexb	rs6453073	73984460	G	I61 Intracerebral haemorrhage	6.02e-05	0.59792	0.174956	0.3305	0.998619	1.04
Hexb	rs7710892	73984610	T	I61 Intracerebral haemorrhage	6.09e-05	0.59316	0.174881	0.2992	0.998948	1.04
Hexb	rs143060773	73984714	C	I61 Intracerebral haemorrhage	-0.0003414	0.561	0.00591764	0.3652	0.921591	0.819
Hexb	rs16872206	73984913	G	I61 Intracerebral haemorrhage	6.09e-05	0.59356	0.174898	0.2938	0.999225	1.04
Hexb	rs35711978	73985121	T	I61 Intracerebral haemorrhage	6.11e-05	0.59233	0.174874	0.2911	0.999534	1.04
Hexb	rs11556045	73985215	A	I61 Intracerebral haemorrhage	-8.48e-05	0.45821	0.1754	0.5554	genotyped	0.951
Hexb	rs820889	73985534	C	I61 Intracerebral haemorrhage	-5.04e-06	0.97453	0.0822019	0.01049	0.997617	0.997
Hexb	rs13188271	73985578	C	I61 Intracerebral haemorrhage	6.31e-05	0.58018	0.174771	0.2963	0.999377	1.04
Hexb	rs13154639	73985910	G	I61 Intracerebral haemorrhage	6.24e-05	0.58414	0.174898	0.2992	0.999217	1.04
Hexb	rs12519436	73986189	C	I61 Intracerebral haemorrhage	6.52e-05	0.56909	0.174014	0.2791	0.995388	1.04
Hexb	rs10942718	73986200	T	I61 Intracerebral haemorrhage	7.3e-05	0.52474	0.17331	0.24	0.994128	1.04
Hexb	rs12521189	73986206	A	I61 Intracerebral haemorrhage	6.65e-05	0.56135	0.174054	0.2871	0.995655	1.04
Hexb	rs12516258	73986427	T	I61 Intracerebral haemorrhage	6.68e-05	0.55908	0.174186	0.2159	0.997521	1.04
Hexb	rs12518926	73986428	G	I61 Intracerebral haemorrhage	6.01e-05	0.59809	0.174803	0.2748	0.998863	1.04
Hexb	rs820875	73986648	G	I61 Intracerebral haemorrhage	4.87e-05	0.58504	0.3939	0.152	genotyped	1.03
Hexb	rs3776484	73986826	C	I61 Intracerebral haemorrhage	6.73e-05	0.55546	0.174717	0.267	0.9992	1.04
Hexb	rs820876	73987048	T	I61 Intracerebral haemorrhage	-5.65e-05	0.5175	0.443778	0.05268	0.995702	0.967
Hexb	rs13178702	73987135	T	I61 Intracerebral haemorrhage	6.77e-05	0.55279	0.174681	0.2695	0.999373	1.04
Hexb	rs3756443	73987546	G	I61 Intracerebral haemorrhage	6.69e-05	0.55781	0.174842	0.2855	0.999197	1.04
Hexb	rs3756444	73987775	G	I61 Intracerebral haemorrhage	7.04e-05	0.43957	0.346075	0.04574	0.99694	1.04
Hexb	rs56320720	73988546	G	I61 Intracerebral haemorrhage	-7.07e-05	0.53619	0.1745	0.5782	genotyped	0.959
Hexb	rs3733791	73989127	G	I61 Intracerebral haemorrhage	7.07e-05	0.53583	0.174766	0.2855	0.998199	1.04
Hexb	rs820877	73989297	T	I61 Intracerebral haemorrhage	8.16e-06	0.96002	0.07707	0.005976	genotyped	1
Hexb	rs1566431	73989894	C	I61 Intracerebral haemorrhage	6.88e-05	0.54738	0.174472	0.3325	0.99683	1.04
Hexb	rs11746583	73989930	A	I61 Intracerebral haemorrhage	4.72e-05	0.68218	0.170899	0.8142	0.997476	1.03
Hexb	rs12517888	73990012	G	I61 Intracerebral haemorrhage	7.12e-05	0.53304	0.174754	0.2854	0.996303	1.04
Hexb	rs13186984	73990784	G	I61 Intracerebral haemorrhage	6.22e-05	0.49122	0.361567	0.009097	0.992617	1.04
Hexb	rs147462655	73990875	G	I61 Intracerebral haemorrhage	-0.0002603	0.54116	0.0110107	0.9357	0.941237	0.859
Hexb	rs3104693	73991185	T	I61 Intracerebral haemorrhage	-1.74e-05	0.84189	0.461159	0.0886	0.991015	0.99
Hexb	rs77412261	73992029	A	I61 Intracerebral haemorrhage	0.00035384	0.22537	0.02307	1.73e-16	genotyped	1.23
Hexb	rs1696979	73992406	G	I61 Intracerebral haemorrhage	5.15e-05	0.56207	0.395974	0.3639	0.991303	1.03
Hexb	rs1665894	73992609	A	I61 Intracerebral haemorrhage	-1.8e-05	0.91213	0.0769803	0.006019	0.98717	0.989
Hexb	rs10805890	73992881	A	I61 Intracerebral haemorrhage	-6.81e-05	0.55481	0.1722	0.09763	genotyped	0.961
Hexb	rs11959392	73993279	G	I61 Intracerebral haemorrhage	0.0003672	0.31207	0.0147	2.29e-32	genotyped	1.24
Hexb	rs62368222	73993419	T	I61 Intracerebral haemorrhage	-9.57e-05	0.79318	0.0152197	0.03788	0.935635	0.945
Hexb	rs11749435	73993420	A	I61 Intracerebral haemorrhage	4.38e-05	0.70589	0.170706	0.4811	0.983685	1.03
Hexb	rs2442041	73993871	C	I61 Intracerebral haemorrhage	-4.48e-05	0.78573	0.0766299	0.01526	0.97206	0.974
Hexb	rs185922357	73994466	T	I61 Intracerebral haemorrhage	-0.0003671	0.3248	0.0141668	0.4104	0.966192	0.806
Hexb	rs79408075	73994693	G	I61 Intracerebral haemorrhage	-0.0004486	0.13686	0.0221772	0.6421	0.948078	0.769
Hexb	rs141662456	73995315	G	I61 Intracerebral haemorrhage	-0.0001539	0.70138	0.0128914	0.03241	0.911148	0.914
Hexb	rs78661372	73995619	G	I61 Intracerebral haemorrhage	-2.43e-05	0.8854	0.0745328	0.5574	0.955688	0.986
Hexb	rs820839	73996407	C	I61 Intracerebral haemorrhage	-2.84e-05	0.78525	0.227732	0.7618	0.977054	0.983
Hexb	rs183908490	73996596	A	I61 Intracerebral haemorrhage	0.00021756	0.53789	0.0160227	0.4073	0.954703	1.14
Hexb	rs820838	73996824	C	I61 Intracerebral haemorrhage	-2.22e-05	0.81182	0.324836	0.7723	0.978434	0.987
Hexb	rs72764630	73997524	T	I61 Intracerebral haemorrhage	-7.6e-05	0.56462	0.124989	0.8446	0.986335	0.956
Hexb	rs11749240	73998721	T	I61 Intracerebral haemorrhage	7.41e-05	0.57261	0.126396	0.4199	0.984657	1.04
Hexb	rs820835	73998880	T	I61 Intracerebral haemorrhage	4.58e-05	0.75034	0.101688	0.1	0.987555	1.03
Hexb	rs11743615	73998974	T	I61 Intracerebral haemorrhage	7.35e-05	0.57549	0.126433	0.4248	0.986376	1.04
Hexb	rs11747101	73999039	G	I61 Intracerebral haemorrhage	6.28e-05	0.62555	0.13418	0.6892	0.975638	1.04
Hexb	rs138428085	73999060	T	I61 Intracerebral haemorrhage	-0.0001539	0.73828	0.00925109	0.098	0.955894	0.914
Hexb	rs820834	73999205	C	I61 Intracerebral haemorrhage	-5.27e-05	0.74007	0.0815068	0.1273	0.990296	0.97
Hexb	rs13360054	73999432	G	I61 Intracerebral haemorrhage	-5.68e-05	0.54968	0.302098	0.8774	0.986688	0.967
Hexb	rs1665886	73999439	T	I61 Intracerebral haemorrhage	4.72e-05	0.74269	0.101783	0.1145	0.988856	1.03
Hexb	rs1665885	73999441	T	I61 Intracerebral haemorrhage	4.68e-05	0.74511	0.101761	0.1123	0.988801	1.03
Hexb	rs820833	73999782	G	I61 Intracerebral haemorrhage	4.74e-05	0.74173	0.101791	0.1146	0.988901	1.03
Hexb	rs820832	73999831	C	I61 Intracerebral haemorrhage	4.73e-05	0.7424	0.101785	0.1146	0.988954	1.03
Hexb	rs113808162	73999834	C	I61 Intracerebral haemorrhage	0.00016767	0.50545	0.03066	0.6239	genotyped	1.1
Hexb	rs820831	74000084	T	I61 Intracerebral haemorrhage	6.89e-05	0.43752	0.404177	0.949	0.98782	1.04
Hexb	rs820830	74000130	T	I61 Intracerebral haemorrhage	4.82e-05	0.73718	0.101836	0.1169	0.989017	1.03
Hexb	rs820829	74000195	T	I61 Intracerebral haemorrhage	6.88e-05	0.43851	0.404038	0.9208	0.987242	1.04
Hexb	rs146120580	74000202	G	I61 Intracerebral haemorrhage	-0.000281	0.62187	0.0063233	0.192	0.920253	0.848
Hexb	rs820828	74000399	A	I61 Intracerebral haemorrhage	-5.07e-05	0.74968	0.0816018	0.1334	0.990085	0.971
Hexb	rs144450050	74001360	C	I61 Intracerebral haemorrhage	9.65e-05	0.72536	0.0280854	0.3155	0.910535	1.06
Hexb	rs56091958	74001617	C	I61 Intracerebral haemorrhage	0.00015165	0.62921	0.0194941	0.1768	1	1.09
Hexb	rs820827	74001977	A	I61 Intracerebral haemorrhage	3.75e-05	0.79388	0.101908	0.09861	0.988735	1.02
Hexb	rs820826	74002331	A	I61 Intracerebral haemorrhage	5.46e-05	0.59809	0.227663	0.585	0.993054	1.03
Hexb	rs144485814	74005358	T	I61 Intracerebral haemorrhage	-0.0004473	0.12703	0.0228037	0.7819	0.978742	0.769
Hexb	rs11746717	74008286	A	I61 Intracerebral haemorrhage	3.25e-06	0.98117	0.116266	0.05033	0.960202	1
Hexb	rs11746757	74008426	C	I61 Intracerebral haemorrhage	-5.28e-05	0.61037	0.227215	0.5582	0.994128	0.97
Hexb	rs11742621	74008523	T	I61 Intracerebral haemorrhage	-5.26e-05	0.61152	0.2272	0.5517	0.994138	0.97
Hexb	rs11746069	74008763	C	I61 Intracerebral haemorrhage	-4.35e-05	0.76202	0.101583	0.1038	0.990645	0.975
Hexb	rs17670605	74008944	A	I61 Intracerebral haemorrhage	-4.34e-05	0.76285	0.101575	0.1038	0.990656	0.975
Hexb	rs145180280	74009199	G	I61 Intracerebral haemorrhage	-0.0003655	0.24593	0.0194069	0.3016	0.99597	0.807
Hexb	rs17561000	74009327	A	I61 Intracerebral haemorrhage	2.77e-05	0.85213	0.09413	0.6889	genotyped	1.02
Hexb	rs72764635	74010102	C	I61 Intracerebral haemorrhage	-1e-06	0.99461	0.0949	0.4749	genotyped	0.999
Hexb	rs114661695	74011484	C	I61 Intracerebral haemorrhage	-0.0001454	0.75203	0.00923823	0.121	0.958828	0.918
Hexb	rs11959570	74011816	G	I61 Intracerebral haemorrhage	-4.56e-05	0.72771	0.125484	0.6338	0.996453	0.974
Hexb	rs114307934	74012740	T	I61 Intracerebral haemorrhage	0.00012462	0.62911	0.0297382	0	1	1.08
Hexb	rs72764640	74013253	G	I61 Intracerebral haemorrhage	4.09e-05	0.7968	0.0814356	0.1944	0.991266	1.02
Hexb	rs6453074	74013611	G	I61 Intracerebral haemorrhage	-7.07e-05	0.50867	0.2091	0.01838	genotyped	0.959
Hexb	rs41271749	74014405	A	I61 Intracerebral haemorrhage	-0.000136	0.59601	0.0299297	0.3597	0.982507	0.923
Hexb	rs28942073	74014629	C	I61 Intracerebral haemorrhage	0.00021174	0.89036	0.0008065	0.1932	genotyped	1.13
Hexb	rs17738111	74015025	C	I61 Intracerebral haemorrhage	5.42e-05	0.733	0.0814921	0.1758	0.991374	1.03
Hexb	rs62366371	74015234	T	I61 Intracerebral haemorrhage	5.27e-05	0.74024	0.0815645	0.1689	0.99205	1.03
Hexb	rs6867972	74015350	C	I61 Intracerebral haemorrhage	-5.01e-05	0.57181	0.407445	0.7987	0.989639	0.971
Hexb	rs141762746	74016877	C	I61 Intracerebral haemorrhage	-0.0004587	0.1145	0.0230978	1	0.982205	0.764
Hexb	rs79357178	74017312	T	I61 Intracerebral haemorrhage	0.00018687	0.5324	0.0226412	0.09595	0.945249	1.12
Hexb	rs1048167	74017499	T	I61 Intracerebral haemorrhage	-4.53e-05	0.72916	0.125536	0.3107	1	0.974
Hexb	rs35080306	74017590	G	I61 Intracerebral haemorrhage	0.000313	0.31889	0.01953	0.1528	genotyped	1.2
Hexb	rs16872220	74018774	C	I61 Intracerebral haemorrhage	-4.3e-05	0.74257	0.125338	0.7488	0.999172	0.975
Hexb	rs142569033	74019606	T	I61 Intracerebral haemorrhage	-0.0003661	0.24412	0.0194323	0.3701	0.999258	0.807
Hexb	rs10515189	74020029	T	I61 Intracerebral haemorrhage	-4.45e-05	0.75662	0.101642	0.1352	0.99254	0.974
Hexb	rs72764642	74020235	A	I61 Intracerebral haemorrhage	2.45e-05	0.8689	0.0946592	0.9762	0.996081	1.01
Hexb	rs62366372	74021201	T	I61 Intracerebral haemorrhage	-0.00017	0.41449	0.04545	0.01947	genotyped	0.905
Hexb	rs143199538	74021324	C	I61 Intracerebral haemorrhage	-0.0001958	0.66463	0.009591	0.03069	0.958392	0.892
Hexb	rs141789665	74021509	A	I61 Intracerebral haemorrhage	-0.0012331	0.35075	0.001081	1	genotyped	0.485
Hexb	rs114172835	74022220	C	I61 Intracerebral haemorrhage	3.74e-06	0.99038	0.0215112	0.7354	0.923212	1
Hexb	rs62366373	74022350	T	I61 Intracerebral haemorrhage	5.3e-05	0.73843	0.08158	0.1623	0.993146	1.03
Hexb	rs6453075	74023041	T	I61 Intracerebral haemorrhage	-5.02e-05	0.6275	0.22701	0.5195	0.996641	0.971
Hexb	rs72764643	74023640	C	I61 Intracerebral haemorrhage	-4.02e-05	0.75922	0.125164	0.7426	0.99918	0.977
Hexb	rs6894177	74024869	G	I61 Intracerebral haemorrhage	-4.28e-05	0.74386	0.125326	0.7488	0.999164	0.975
Hexb	rs11746611	74024873	A	I61 Intracerebral haemorrhage	-4.44e-05	0.75737	0.101643	0.1352	0.992999	0.974
Hexb	rs57549677	74025150	G	I61 Intracerebral haemorrhage	-4.28e-05	0.7439	0.125326	0.7488	0.99916	0.975
Hexb	rs11743655	74025266	G	I61 Intracerebral haemorrhage	-5.2e-05	0.61542	0.227234	0.5134	0.99654	0.97
Hexb	rs149505551	74026071	A	I61 Intracerebral haemorrhage	-8.44e-05	0.84889	0.010377	1	0.926036	0.952
Hexb	rs143461990	74026093	C	I61 Intracerebral haemorrhage	-0.0001663	0.78116	0.005276	0.7429	genotyped	0.907
Hexb	Affx-80273723	74026116	TCGATATG	I61 Intracerebral haemorrhage	0.0017052	0.64525	0.0001372	1	genotyped	2.72
Hexb	rs113347529	74026884	C	I61 Intracerebral haemorrhage	-4.6e-05	0.72547	0.125523	0.7253	0.996642	0.973
Hexb	rs114542784	74028417	G	I61 Intracerebral haemorrhage	-0.000278	0.41371	0.0169759	0.6789	0.971997	0.85
Hexb	rs62366375	74029586	T	I61 Intracerebral haemorrhage	-4.62e-05	0.74719	0.101773	0.1193	0.997514	0.973
Hexb	rs62366376	74030081	C	I61 Intracerebral haemorrhage	-4.4e-05	0.75927	0.10166	0.119	0.99637	0.975
Hexb	rs13164140	74030338	A	I61 Intracerebral haemorrhage	-3.13e-05	0.7594	0.236445	0.29	0.991568	0.982
Hexb	rs6877188	74031525	A	I61 Intracerebral haemorrhage	-3.85e-05	0.76903	0.125042	0.8205	0.999586	0.978
Hexb	rs149576436	74031585	C	I61 Intracerebral haemorrhage	-0.0001816	0.82509	0.00300513	0.546	0.920832	0.899
Hexb	rs16872231	74032116	A	I61 Intracerebral haemorrhage	-3.85e-05	0.76906	0.125042	0.8144	0.999714	0.978
Hexb	rs7713812	74032897	C	I61 Intracerebral haemorrhage	-4.13e-05	0.75269	0.125224	0.8086	0.99963	0.976
Hexb	rs17670701	74033309	C	I61 Intracerebral haemorrhage	5.3e-05	0.73786	0.0816087	0.1308	0.997313	1.03
Hexb	rs142926951	74033658	G	I61 Intracerebral haemorrhage	-0.0003653	0.24556	0.0194148	0.3937	0.99756	0.807
Hexb	rs6453076	74033701	A	I61 Intracerebral haemorrhage	-4.11e-05	0.75361	0.125207	0.8146	0.999779	0.976
Hexb	rs6453077	74033944	T	I61 Intracerebral haemorrhage	-4.85e-05	0.6392	0.226846	0.4464	0.998867	0.972
Hexb	rs7732843	74034245	A	I61 Intracerebral haemorrhage	-4.12e-05	0.75322	0.125208	0.8207	0.999646	0.976
Hexb	rs779411230	74034681	A	I61 Intracerebral haemorrhage	0.0005968	0.61308	0.00146343	0.1538	0.922132	1.42
Hexb	rs115655426	74034824	C	I61 Intracerebral haemorrhage	-0.0003637	0.24809	0.0193857	0.3684	0.997247	0.808
Hexb	rs10515190	74034985	C	I61 Intracerebral haemorrhage	-0.0004081	0.18778	0.0200558	0.3824	0.990344	0.787
Hexb	rs115208747	74035221	G	I61 Intracerebral haemorrhage	4.62e-05	0.92122	0.008677	0.1106	genotyped	1.03
Hexb	rs145136703	74035504	G	I61 Intracerebral haemorrhage	-3.19e-05	0.93676	0.0124324	1	0.939561	0.981
Hexb	rs10075965	74036794	T	I61 Intracerebral haemorrhage	-1.96e-05	0.86236	0.180441	0.3777	0.990975	0.989
Hexb	rs16872235	74037386	T	I61 Intracerebral haemorrhage	4.82e-05	0.71413	0.125	0.4899	genotyped	1.03
Hexb	rs72764647	74037989	T	I61 Intracerebral haemorrhage	-3.85e-05	0.76914	0.125041	0.8144	0.999784	0.978
Hexb	rs139120037	74038186	C	I61 Intracerebral haemorrhage	-0.000365	0.24591	0.0194122	0.3937	0.997772	0.807
Hexb	rs56127814	74038805	A	I61 Intracerebral haemorrhage	-3.94e-05	0.76395	0.125098	0.8757	0.999858	0.977
Hexb	rs11743415	74039150	A	I61 Intracerebral haemorrhage	-4.36e-05	0.76105	0.101692	0.1236	0.996559	0.975
Hexb	rs7732440	74039263	C	I61 Intracerebral haemorrhage	7.64e-05	0.57134	0.12	0.09506	genotyped	1.05
Hexb	rs55996695	74040882	A	I61 Intracerebral haemorrhage	6.02e-05	0.64581	0.125307	0.3622	0.999036	1.04
Hexb	rs150919162	74041105	C	I61 Intracerebral haemorrhage	-0.0005376	0.22718	0.0104699	0.7953	0.905847	0.73
Hexb	rs6453078	74041124	C	I61 Intracerebral haemorrhage	-6.13e-05	0.56614	0.209471	0.5027	0.994878	0.965
Hexb	rs535593621	74041318	A	I61 Intracerebral haemorrhage	0.00035626	0.67421	0.00285415	0.4632	0.914816	1.23
Hexb	rs6453079	74041329	G	I61 Intracerebral haemorrhage	-4.09e-05	0.75466	0.125211	0.8207	0.999599	0.976
Hexb	rs116830945	74043638	C	I61 Intracerebral haemorrhage	-0.0003695	0.44029	0.0083982	0.2623	0.982777	0.805
Hexb	rs6881010	74043934	T	I61 Intracerebral haemorrhage	-5.89e-05	0.58147	0.209865	0.5536	0.995322	0.966
Hexb	rs58864890	74044605	A	I61 Intracerebral haemorrhage	-3.95e-05	0.76327	0.125104	0.8757	0.999606	0.977
Hexb	rs11741464	74044609	A	I61 Intracerebral haemorrhage	-5.5e-05	0.70157	0.101604	0.1256	0.996775	0.968
Hexb	rs147905476	74044668	A	I61 Intracerebral haemorrhage	2.89e-05	0.84558	0.0948866	0.9525	0.99388	1.02
Hexb	rs141831969	74045144	G	I61 Intracerebral haemorrhage	-0.0002924	0.36745	0.0183851	0.3668	0.988358	0.843
Hexb	rs17852781	74046464	T	I61 Intracerebral haemorrhage	-5.51e-05	0.70081	0.101615	0.1257	0.996489	0.968
Hexb	rs6873998	74046656	G	I61 Intracerebral haemorrhage	-4.18e-05	0.7499	0.125269	0.8147	0.999539	0.976
Hexb	rs16872242	74047436	A	I61 Intracerebral haemorrhage	-3.9e-05	0.76599	0.125072	0.8757	0.999749	0.977
Hexb	rs61093699	74047692	T	I61 Intracerebral haemorrhage	-5.23e-05	0.71574	0.101422	0.1077	0.996295	0.97
Hexb	rs6898684	74047963	G	I61 Intracerebral haemorrhage	-4.36e-05	0.73901	0.125353	0.7725	0.999499	0.975
Hexb	rs6873912	74048150	A	I61 Intracerebral haemorrhage	-4.07e-05	0.75599	0.125175	0.8146	0.999717	0.976
Hexb	rs75898801	74048487	A	I61 Intracerebral haemorrhage	-7.46e-05	0.63431	0.0865791	0.2952	0.96531	0.957
Hexb	rs72764650	74049046	G	I61 Intracerebral haemorrhage	-3.62e-05	0.78264	0.124895	0.8817	0.999793	0.979
Hexb	rs10057606	74049196	A	I61 Intracerebral haemorrhage	-1.97e-05	0.86193	0.180419	0.4163	0.991138	0.989
Hexb	rs147606872	74049336	C	I61 Intracerebral haemorrhage	-3.8e-05	0.77182	0.125008	0.8144	0.999755	0.978
Hexb	rs2314936	74050209	T	I61 Intracerebral haemorrhage	-5.46e-05	0.59741	0.226862	0.4851	0.999082	0.968
Hexb	rs6884338	74050271	A	I61 Intracerebral haemorrhage	-3.89e-05	0.76671	0.125069	0.8205	0.999732	0.977
Hexb	rs2314937	74050315	C	I61 Intracerebral haemorrhage	-5.53e-05	0.59316	0.226932	0.4821	0.999018	0.968
Hexb	rs116523183	74050666	T	I61 Intracerebral haemorrhage	-0.0001417	0.72577	0.0127212	0.2848	0.911871	0.92
Hexb	rs62366406	74050752	T	I61 Intracerebral haemorrhage	-5.79e-05	0.6862	0.101773	0.1307	0.998263	0.967
Hexb	rs59110717	74051232	A	I61 Intracerebral haemorrhage	-5.69e-05	0.58244	0.227089	0.4977	0.999079	0.967
Hexb	rs142201617	74051856	T	I61 Intracerebral haemorrhage	-0.0003646	0.2466	0.0194074	0.3936	0.996855	0.808
Hexb	rs150544130	74052420	A	I61 Intracerebral haemorrhage	-0.0003644	0.24679	0.0194058	0.3936	0.997667	0.808
Hexb	rs77437197	74053599	A	I61 Intracerebral haemorrhage	-0.0004096	0.18604	0.0200747	0.3825	0.990288	0.787
Hexb	rs62366408	74053764	G	I61 Intracerebral haemorrhage	-5.67e-05	0.58331	0.227078	0.5008	0.999222	0.967
Hexb	rs10515191	74054595	G	I61 Intracerebral haemorrhage	-5.66e-05	0.58395	0.227061	0.4946	0.999336	0.967
Hexb	rs957680	74055209	T	I61 Intracerebral haemorrhage	2.4e-05	0.85475	0.1262	0.01438	genotyped	1.01
Hexb	rs7705519	74056513	C	I61 Intracerebral haemorrhage	-9.03e-05	0.46424	0.144457	0.9614	0.999503	0.948
Hexb	rs10515192	74057714	A	I61 Intracerebral haemorrhage	-3.85e-05	0.76923	0.125037	0.8266	0.99979	0.978
Hexb	rs11948188	74058083	T	I61 Intracerebral haemorrhage	-5.49e-05	0.59536	0.226867	0.4791	0.999298	0.968
Hexb	rs62366409	74058218	C	I61 Intracerebral haemorrhage	0.00018906	0.38826	0.0414087	0.01134	0.98303	1.12
Hexb	rs56365996	74058260	C	I61 Intracerebral haemorrhage	-5.49e-05	0.59588	0.226875	0.4821	0.999333	0.968
Hexb	rs10942719	74058398	T	I61 Intracerebral haemorrhage	-4.16e-05	0.63777	0.410214	0.9522	0.995971	0.976
Hexb	rs55870102	74058613	G	I61 Intracerebral haemorrhage	-5.5e-05	0.59522	0.226889	0.4883	0.999422	0.968
Hexb	rs10515193	74059091	C	I61 Intracerebral haemorrhage	6.74e-05	0.60676	0.125536	0.3587	0.998665	1.04
Hexb	rs79992455	74059525	T	I61 Intracerebral haemorrhage	-4.85e-05	0.90308	0.01204	0.6708	genotyped	0.972
Hexb	rs72764654	74059708	C	I61 Intracerebral haemorrhage	-3.85e-05	0.76903	0.125039	0.8205	0.999783	0.978
Hexb	rs147231258	74059770	A	I61 Intracerebral haemorrhage	-0.0003651	0.24576	0.0194132	0.3937	0.996705	0.807
Hexb	rs10515194	74059851	A	I61 Intracerebral haemorrhage	-3.86e-05	0.76841	0.125043	0.8205	0.999777	0.978
Hexb	rs62366412	74061081	T	I61 Intracerebral haemorrhage	-7.39e-05	0.57277	0.1254	0.1779	genotyped	0.958
Hexb	rs72764655	74061244	C	I61 Intracerebral haemorrhage	-3.66e-05	0.77988	0.124923	0.8694	0.99968	0.979
Hexb	rs72764656	74061281	A	I61 Intracerebral haemorrhage	-3.84e-05	0.76948	0.125032	0.8023	0.999636	0.978
Hexb	rs116058851	74062242	T	I61 Intracerebral haemorrhage	-0.0003684	0.33362	0.014194	0.692	0.914915	0.806
Hexb	rs17738266	74062266	C	I61 Intracerebral haemorrhage	4.22e-05	0.78996	0.0814398	0.1516	0.998374	1.03
Hexb	rs17647023	74062358	T	I61 Intracerebral haemorrhage	-4.34e-05	0.67031	0.237406	0.3533	0.994642	0.975
Hexb	rs11556477	74062881	T	I61 Intracerebral haemorrhage	3.9e-05	0.80566	0.0815815	0.1427	0.997805	1.02
Hexb	rs6453081	74063069	A	I61 Intracerebral haemorrhage	-0.0003854	0.21746	0.0197043	0.5055	0.990098	0.798
Hexb	rs1043968	74063154	G	I61 Intracerebral haemorrhage	-5.24e-05	0.61302	0.226594	0.491	0.999302	0.97
Hexb	rs116165962	74063250	C	I61 Intracerebral haemorrhage	-3.86e-05	0.7684	0.125049	0.8942	0.999598	0.978
Hexb	rs79669494	74063268	T	I61 Intracerebral haemorrhage	-4.11e-05	0.7537	0.125202	0.8147	0.999619	0.976
Hexb	rs1164693	74064149	G	I61 Intracerebral haemorrhage	-9.67e-05	0.74745	0.0214	0.1448	genotyped	0.945
Hexb	rs6879781	74064314	C	I61 Intracerebral haemorrhage	-5.26e-05	0.61126	0.226623	0.5318	0.999519	0.97
Hexb	rs72764657	74064340	G	I61 Intracerebral haemorrhage	-4e-05	0.76006	0.125133	0.7723	0.999564	0.977
Hexb	rs6882035	74065821	G	I61 Intracerebral haemorrhage	-3.83e-05	0.77014	0.125024	0.7841	0.999542	0.978
Hexb	rs3932895	74065953	G	I61 Intracerebral haemorrhage	-4.91e-05	0.73231	0.101272	0.1156	0.996991	0.972
Hexb	rs1164694	74066386	A	I61 Intracerebral haemorrhage	-0.0001471	0.50555	0.04023	0.8089	genotyped	0.917
Hexb	rs75138268	74066711	T	I61 Intracerebral haemorrhage	-0.0002466	0.56049	0.0109663	0.6836	0.960374	0.865
Hexb	rs114548474	74067401	A	I61 Intracerebral haemorrhage	1.78e-05	0.9543	0.021465	0.7361	0.925753	1.01
Hexb	rs6870806	74067536	C	I61 Intracerebral haemorrhage	-4e-05	0.76014	0.125237	0.7544	0.998613	0.977
Hexb	rs62366413	74067727	A	I61 Intracerebral haemorrhage	-1.52e-06	0.99244	0.0797408	0.2652	0.991314	0.999
Hexb	rs116688227	74068507	A	I61 Intracerebral haemorrhage	-8.74e-05	0.80213	0.0165663	0.4083	0.944367	0.95
Hexb	rs16872259	74068774	T	I61 Intracerebral haemorrhage	-3.6e-05	0.78349	0.124887	0.8325	0.999802	0.979
